# Supplementary material for: Recent advances in clinical practice: colorectal cancer chemoprevention in the average-risk population
Source: PubMed Central journal article supplement — Gut. 2020 Sep 28;69(12):2244–55. doi: 10.1136/gutjnl-2020-320990 (PMC7677480; doi:10.1136/gutjnl-2020-320990), 2020-09-28
Supplement: gutjnl-2020-320990supp001.pdf [file gutjnl-2020-320990supp001.pdf]

Supplementary Table 1. Components with a protective effect on CRC prevention

| Study Country (Reference)       | Search period and databases searched                        | Inclusion / exclusion criteria                                                                                                                                                                                                                             | Intervention                      | Control | Outcomes                                         | Results                                                                                                                                                                                                                                                                            | Quality score Heterogeneity Publication bias                                                                |
|---------------------------------|-------------------------------------------------------------|------------------------------------------------------------------------------------------------------------------------------------------------------------------------------------------------------------------------------------------------------------|-----------------------------------|---------|--------------------------------------------------|------------------------------------------------------------------------------------------------------------------------------------------------------------------------------------------------------------------------------------------------------------------------------------|-------------------------------------------------------------------------------------------------------------|
| <b>ASPIRIN</b>                  |                                                             |                                                                                                                                                                                                                                                            |                                   |         |                                                  |                                                                                                                                                                                                                                                                                    |                                                                                                             |
| Bosetti et al., 2006 Italy [10] | up to December 2005 Medline                                 | <b>Inclusion:</b> not specific other than search sting terms<br><b>Exclusion:</b> Articles reporting estimates for all NSAIDs combined                                                                                                                     | Aspirin                           | NS      | CRC incidence<br>11 case-control; 7 Cohort       | Overall:<br><b>RR=0.71 (0.67;0.75)</b><br>case-control:<br><b>RR=0.59 (0.54;0.64)</b><br>Cohort:<br><b>RR=0.85 (0.78;0.92)</b>                                                                                                                                                     | Quality score and publication bias: not performed<br><br>Heterogeneity: <0.001                              |
| Dubé et al., 2007 Canada [14]   | up to December 2006 Medline, preMedline, Embase and Central | <b>Inclusions:</b> Patients at average risk of CRC<br><b>Exclusions:</b> 1) studies of familial adenomatous polyposis or hereditary nonpolyposis colon cancer syndromes (Lynch I or II); 2) Secondary prevention studies of patients with a history of CRC | Aspirin regular use               | NS      | CRC incidence<br>2 RCT; 7 case-control; 6 Cohort | case-control:<br>1 to 3 years:<br><b>RR=0.85 (0.72;1.00)</b><br>4 to 6 years<br><b>RR=0.74 (0.60;0.90)</b><br><br>Cohort:<br><b>RR=0.78 (0.63;0.97)</b>                                                                                                                            | Quality score; heterogeneity; publication bias: NS                                                          |
|                                 |                                                             |                                                                                                                                                                                                                                                            | Low dose aspirin (100-325 mg/day) | Placebo | CRC incidence<br>2 RCT                           | RR=1.02 (0.84; 1.25)                                                                                                                                                                                                                                                               | Quality score; heterogeneity; publication bias: not specified.                                              |
| Din et al., 2010 UK [11]        | From 1980 to 2010 Medline and ISI web of knowledge          | <b>Inclusions:</b> (1) studies measuring CRC incidence; (2) the strength of association had to be stated in the form of RR or OR; and (3) the study population had to be comparable with the general population;<br><b>Exclusions:</b> Not English article | Low dose aspirin: ≤ 165 mg daily  | NS      | CRC incidence<br>6 case-control; 4 Cohort        | <u>Dose response:</u><br><525mg/week:<br><b>RR= 0.79 (0.66;0.95)</b><br>525;1050 mg/week:<br>RR=0.69 (0.43;1.11)<br>>1050 mg/week:<br>RR=0.73 (0.33;1.60)<br><br>case-control:<br>OR=0.81 (0.63;1.04)<br>Cohort:<br>RR =0.90 (0.90, 1.09)<br>case-control:<br>OR=0.81 (0.63; 1.04) | Quality score; publication bias: not specified.<br><br>Heterogeneity case-control: p=0.06<br>Cohort: p=0.44 |

| Study Country (Reference)             | Search period and databases searched       | Inclusion / exclusion criteria                                                                                                                                                                                                                                                                                                                                                                                                                                                                                        | Intervention                                                                                 | Control | Outcomes                                                                                                                 | Results                                                                                                                                                                                                                                                                                                                     | Quality score<br>Heterogeneity<br>Publication bias                                                                                                                                                                                         |
|---------------------------------------|--------------------------------------------|-----------------------------------------------------------------------------------------------------------------------------------------------------------------------------------------------------------------------------------------------------------------------------------------------------------------------------------------------------------------------------------------------------------------------------------------------------------------------------------------------------------------------|----------------------------------------------------------------------------------------------|---------|--------------------------------------------------------------------------------------------------------------------------|-----------------------------------------------------------------------------------------------------------------------------------------------------------------------------------------------------------------------------------------------------------------------------------------------------------------------------|--------------------------------------------------------------------------------------------------------------------------------------------------------------------------------------------------------------------------------------------|
|                                       |                                            |                                                                                                                                                                                                                                                                                                                                                                                                                                                                                                                       |                                                                                              |         |                                                                                                                          | Cohort:<br>RR =0.90 (0.90, 1.09)                                                                                                                                                                                                                                                                                            |                                                                                                                                                                                                                                            |
|                                       |                                            |                                                                                                                                                                                                                                                                                                                                                                                                                                                                                                                       | Low dose aspirin: ≤ 165 mg daily                                                             | NS      | CRC incidence<br>6 case-control; 4 Cohort                                                                                | 75mg/day<br><b>RR= 0.78 (0.65;0.92)</b><br><525mg/week:<br><b>RR=0.79 (0.66;0.95)</b><br>Duration: 75mg/day for:<br>0-1 year<br>RR=0.87 (0.59;1.28),<br>5-10 years:<br><b>RR=0.63 (0.45;0.87)</b><br>>10 years<br>RR=0.82 (0.58;1.16).<br><br>case-control:<br>OR=0.81 (0.63; 1.04)<br>Cohort:<br>RR =0.99 (0.90, 1.09)     |                                                                                                                                                                                                                                            |
| Bosetti et al., 2012<br>Italy<br>[12] | Up to September 2011<br>Pubmed and Medline | <b>Inclusions:</b> 1) aspirin use considered separately from other NSAIDs; 2) original data 3) not based on selected patients with specific diseases; 4) published in English language;<br><br><b>Exclusions:</b> 1) patients with rheumatoid arthritis; 2) study on users on low;dose aspirin only 3) RCT of aspirin, usually with cardiovascular events as the primary endpoint; 4) multiple reports were published on the same population or subpopulation (included only the most recent and the informative one) | Aspirin;<br>Regular aspirin use at least 1–2 tablets per week) or alternatively ever/any use | NS      | <b>CRC incidence</b><br>15 case-control; 15 Cohort<br><br>37,519 cases (21,414 from case-control and 16,105 from Cohort) | <b>RR=0.63 (0.56–0.70)</b><br><b>Cohort</b><br><b>RR=0.82 (0.75–0.89)</b><br><br><u>Daily Aspirin use</u><br><b>RR=0.66 (0.57–0.77)</b><br><5 years<br><b>RR=0.80 (0.71–0.91)</b><br>>5 years<br><b>RR=0.75 (0.70–0.80)</b><br><br><u>Low dose</u><br>RR=0.95 (0.76–1.19)<br><u>High dose</u><br><b>RR=0.69 (0.57–0.85)</b> | Quality score: not performed<br><br>Heterogeneity:<br>Overall <0.001 (I <sup>2</sup> =75.5%)<br><br>case-control <0.001 (I <sup>2</sup> =65.4%)<br><br>Cohort<0.001 (I <sup>2</sup> =66%)<br><br>Duration p=0.369<br>Publication bias: yes |
|                                       |                                            |                                                                                                                                                                                                                                                                                                                                                                                                                                                                                                                       |                                                                                              |         | <b>Colon</b>                                                                                                             | Overall                                                                                                                                                                                                                                                                                                                     | Not reported                                                                                                                                                                                                                               |

| Study Country (Reference)    | Search period and databases searched                                                            | Inclusion / exclusion criteria                                                                                                                                                                                                                                                                                                                                                                                                                                                                                                                                                                                                                                                                                       | Intervention              | Control                  | Outcomes                                                   | Results                                                                                                                                                                                                           | Quality score Heterogeneity Publication bias                                                                            |
|------------------------------|-------------------------------------------------------------------------------------------------|----------------------------------------------------------------------------------------------------------------------------------------------------------------------------------------------------------------------------------------------------------------------------------------------------------------------------------------------------------------------------------------------------------------------------------------------------------------------------------------------------------------------------------------------------------------------------------------------------------------------------------------------------------------------------------------------------------------------|---------------------------|--------------------------|------------------------------------------------------------|-------------------------------------------------------------------------------------------------------------------------------------------------------------------------------------------------------------------|-------------------------------------------------------------------------------------------------------------------------|
|                              |                                                                                                 |                                                                                                                                                                                                                                                                                                                                                                                                                                                                                                                                                                                                                                                                                                                      |                           |                          | <b>cancer incidence</b><br>6 case-control; 6 Cohort        | <b>RR=0.71 (0.63;0.80)</b><br>case-control:<br><b>RR=0.61 (0.50–0.76)</b><br>Cohort:<br><b>RR=0.77 (0.67–0.89)</b>                                                                                                |                                                                                                                         |
|                              |                                                                                                 |                                                                                                                                                                                                                                                                                                                                                                                                                                                                                                                                                                                                                                                                                                                      |                           |                          | <b>Rectal cancer incidence</b><br>3 case-control; 6 Cohort | <b>RR=0.68 (0.55;0.83)</b>                                                                                                                                                                                        | Not reported                                                                                                            |
| Yé et al., 2013[13]<br>China | January 1990 to June 2012<br>Medline, Pubmed, Embase, ISI web, web of science, wanfang and cnki | <b>Inclusions:</b> 1) Cohort study design; 2) provide information on aspirin use in relation to CRC; 3) include three or more quantitatively measured exposure categories of aspirin use (such as dose, frequency and duration); 4) have CRC incidence as defined above as the endpoint; and 5) report original data and include HR or RR and their 95% CIs<br><br><b>Exclusion:</b> 1) not published as full reports 2) cross-sectional or case-control design; 3) based on selected patients with specific diseases (such as adenomas, ulcerative colitis or prior cancer) 4) When multiple reports were published on the same population or subpopulation, only the most recent and informative one were selected | Aspirin highest Dose      | Aspirin lowest Dose      | <b>CRC incidence</b><br>5 Cohort                           | Overall:<br><b>RR=0.74 (0.64;0.83)</b>                                                                                                                                                                            | Quality score; not performed<br><br>Heterogeneity:<br>p=0.545 (I <sup>2</sup> =0.0%)<br><br>Publication bias: No        |
|                              |                                                                                                 |                                                                                                                                                                                                                                                                                                                                                                                                                                                                                                                                                                                                                                                                                                                      | Aspirin highest Frequency | Aspirin lowest Frequency | <b>CRC incidence</b><br>9 Cohort                           | <b>RR=0.80 (0.75;0.85)</b><br><br><u>Subgroup:</u><br>Men:<br><b>RR=0.60 (0.27;0.93)</b><br>Women:<br><b>RR=0.82 (0.73;0.91)</b><br>Colon:<br><b>RR=0.76 (0.65;0.87)</b><br>Rectal:<br><b>RR=0.74 (0.64;0.83)</b> | Quality score; not performed<br><br>Heterogeneity:<br>p=0.384 (I <sup>2</sup> =6.2%)<br><br>Publication bias:<br>Slight |
|                              |                                                                                                 |                                                                                                                                                                                                                                                                                                                                                                                                                                                                                                                                                                                                                                                                                                                      | Aspirin highest Duration  | Aspirin lowest Duration  | <b>CRC incidence</b><br>9 Cohort                           | <b>RR=0.75 (0.68;0.81)</b><br><br><u>Subgroup:</u><br>Men:<br><b>RR=0.70 (0.54;0.86)</b><br>Women:<br><b>RR=0.73 (0.62;0.84)</b>                                                                                  | Quality score; not performed<br><br>Heterogeneity:<br>p=0.160 (I <sup>2</sup> =31.1%)<br><br>Publication bias: Yes      |

| Study Country (Reference)         | Search period and databases searched                                                                                       | Inclusion / exclusion criteria                                                                                                                                                                                                                                                                                                                                                                                                                                                                                              | Intervention                               | Control      | Outcomes                                  | Results                                                                                                                                              | Quality score Heterogeneity Publication bias                                                                      |
|-----------------------------------|----------------------------------------------------------------------------------------------------------------------------|-----------------------------------------------------------------------------------------------------------------------------------------------------------------------------------------------------------------------------------------------------------------------------------------------------------------------------------------------------------------------------------------------------------------------------------------------------------------------------------------------------------------------------|--------------------------------------------|--------------|-------------------------------------------|------------------------------------------------------------------------------------------------------------------------------------------------------|-------------------------------------------------------------------------------------------------------------------|
|                                   |                                                                                                                            |                                                                                                                                                                                                                                                                                                                                                                                                                                                                                                                             |                                            |              |                                           | Colon:<br><b>RR=0.67 (0.44;0.91)</b><br>Rectal:<br><b>RR=0.54 (0.20;0.88)</b>                                                                        |                                                                                                                   |
|                                   |                                                                                                                            |                                                                                                                                                                                                                                                                                                                                                                                                                                                                                                                             | Dose response                              | Vs no intake |                                           | <u>75 mg/day</u><br><b>RR=0.90 (0.86;0.94)</b><br><u>163 mg/day</u><br><b>RR=0.86 (0.81;0.91)</b><br><u>325 mg/day</u><br><b>RR=0.80 (0.74;0.88)</b> | Quality: not performed<br>Heterogeneity: unknown<br>Publication bias: no                                          |
| Emilsson et al., 2017 Norway [15] | Up to 31 October 2015 COCHRANE central register Medline and EMBASE                                                         | <b>Inclusion:</b> RCT reporting CRC mortality, CRC incidence, or both, with a minimum FU of 2 years and more than 100 included individuals<br><b>Exclusions:</b> high-risk populations (such as individuals with familial adenomatous polyposis or Lynch syndrome)                                                                                                                                                                                                                                                          | Aspirin                                    | Placebo      | <b>CRC incidence</b><br>6 RCT             | <b>Colorectal</b><br><b>RR=0.86 (0.76;0.98)</b><br><b>Proximal:</b><br><b>RR=0.58 (0.46;0.74)</b><br><b>Distal:</b><br>RR=0.77 (0.58;1.04)           | Quality score; no quality score<br>Heterogeneity: Colorectal: I <sup>2</sup> = 22.6%<br>Publication bias: unknown |
| <b>NSAID</b>                      |                                                                                                                            |                                                                                                                                                                                                                                                                                                                                                                                                                                                                                                                             |                                            |              |                                           |                                                                                                                                                      |                                                                                                                   |
| Rostom et al., 2007 Canada [16]   | up to December 2006<br><br>MEDLINE, EMBASE, Cochrane Central Register of Controlled Trials (CENTRAL), and Cochrane Library | <b>Inclusions:</b> 1) subjects at average risk for CRC (that is, no known risk factors for colorectal adenoma or CRC, other than age) 2) studies of higher-risk individuals with a personal or family history of CRA or a family history of sporadic CRC 3) addressed the incidence of CRA, CRC, or both and CRC related death or overall death.<br><b>Exclusions:</b> 1) studies of high risk patients with familial adenomatous polyposis or hereditary nonpolyposis colon cancer syndromes (Lynch I or II) and secondary | Regular use of non-ASA NSAIDs for ≥ 1 year | NS           | CRC incidence<br>4 case-control; 3 Cohort | <b>case-control:</b><br><b>RR=0.70(0.63;0.78)</b><br><b>Cohort:</b><br><b>RR=0.61(0.48;0.77)</b>                                                     | Not reported                                                                                                      |
|                                   |                                                                                                                            |                                                                                                                                                                                                                                                                                                                                                                                                                                                                                                                             | Regular use of any NSAID for ≥ 1 year      | NS           | 3 Cohort                                  | <b>RR=0.57(0.47;0.68)</b>                                                                                                                            | Not reported                                                                                                      |

| Study Country (Reference) | Search period and databases searched                  | Inclusion / exclusion criteria                                                                                                                                                                                                                                                                                                                                                                                                                                                                                                                                                                                                                                                                                                                                                                                                                                  | Intervention | Control | Outcomes                                                                                                        | Results                                                                                                                                                                                                                                                                                                                                                                                                                                                                                                | Quality score<br>Heterogeneity<br>Publication bias                                                                                                                                                                                                                                                                                                                                                                                                                         |
|---------------------------|-------------------------------------------------------|-----------------------------------------------------------------------------------------------------------------------------------------------------------------------------------------------------------------------------------------------------------------------------------------------------------------------------------------------------------------------------------------------------------------------------------------------------------------------------------------------------------------------------------------------------------------------------------------------------------------------------------------------------------------------------------------------------------------------------------------------------------------------------------------------------------------------------------------------------------------|--------------|---------|-----------------------------------------------------------------------------------------------------------------|--------------------------------------------------------------------------------------------------------------------------------------------------------------------------------------------------------------------------------------------------------------------------------------------------------------------------------------------------------------------------------------------------------------------------------------------------------------------------------------------------------|----------------------------------------------------------------------------------------------------------------------------------------------------------------------------------------------------------------------------------------------------------------------------------------------------------------------------------------------------------------------------------------------------------------------------------------------------------------------------|
|                           |                                                       | prevention studies of patients with a personal history of CRC.                                                                                                                                                                                                                                                                                                                                                                                                                                                                                                                                                                                                                                                                                                                                                                                                  |              |         |                                                                                                                 |                                                                                                                                                                                                                                                                                                                                                                                                                                                                                                        |                                                                                                                                                                                                                                                                                                                                                                                                                                                                            |
| Din et al., 2010 UK [11]  | From 1980 to 2010<br>Medline and ISI web of knowledge | <b>Inclusions:</b> (1) studies that measured CRC incidence; (2) the strength of association had to be stated in the form of RR or OR; and (3) the study population had to be comparable with the general population;<br><br><b>Exclusions:</b> Not English article                                                                                                                                                                                                                                                                                                                                                                                                                                                                                                                                                                                              | NSAID        | NS      | CRC incidence<br>6 case-control; 4 Cohort                                                                       | Any NSAID<br><b>RR=0.73 (0.64;0.83)</b><br>Non-aspirin NSAID<br><b>RR= 0.74 (0.60;0.90).</b><br><br>Duration: Any NSAID<br>0-1 year:<br>RR= 0.82 (0.66;1.03)<br>5-10 years:<br><b>RR= 0.57 (0.44;0.75)</b>                                                                                                                                                                                                                                                                                             | Quality score;<br>publication bias: not specified.<br><br>Heterogeneity<br>NS                                                                                                                                                                                                                                                                                                                                                                                              |
| Tomic et al., 2018 [17]   | From 1985 to April 2019                               | <b>Inclusions:</b> (1) original clinical studies; (2) studies that included participants aged 40 years or older, male and/or female; (3) exposure- NA-NSAIDs; (4) case-control, Cohort or RCT studies providing information about association measures- OR, RR and their CI analysing the effects of NA-NSAIDs on CRC risk or providing sufficient data from which it could be calculated; and studies written in English, French, Spanish, German or Italian<br><br><b>Exclusions:</b><br>(1) preclinical studies; (2) studies including participants of all ages; (3) exposure- Aspirin included; (4) studies based solely on mortality/survival rates; (5) secondary prevention studies, where the main aim has not been the investigation of the NA-NSAIDs effect on CRC prevention; and finally (6) reviews, previous meta-analysis, editorials or letters |              |         | CRC incidence<br>10 Cohort,<br>13 case-control,<br><br>Higher dose<br>5 Cohort<br>Lower doses<br>3 case-control | Combined analysis:<br><b>OR=0.74 (0.67;0.81)</b><br>(random effect)<br>Cohort:<br><b>OR=0.80 (0.72;0.88)</b><br>case-control:<br><b>OR = 0.61 (0.50;0.75)</b><br><br>Men overall:<br>OR=0.86 (0.70;1.06)<br>Men case-control<br>OR=0.80 (0.58;1.12)<br>Women overall:<br><b>OR=0.67 (0.53;0.85)</b><br>Women Cohort<br><b>OR=0.81 (0.67;0.98)</b><br><br>Higher doses<br><b>RR= 0.82 (0.69;0.99)</b><br>Lower doses<br>RR= 0.92 (0.83;1.01)<br><br>Proximal colon cancer<br><b>RR=0.73 (0.60;0.87)</b> | <b>Quality score NOS</b><br><b>Heterogeneity</b><br>Combined analysis<br>$I^2 = 75.9\%$ , $p < 0.001$<br>Cohort;<br>$I^2 = 69.9\%$ , $p < 0.001$<br>case-control:<br>$I^2 = 80.1\%$ , $p < 0.001$<br><br>Men overall :<br>$I^2 = 15.9\%$ $p=0.312$ ,<br><br>Women overall<br>$I^2 = 54.5\%$ $p=0.031$<br><br>Higher doses $I^2=0\%$ ,<br>$p=0.594$<br>Lower doses<br>$I^2=0.9\%$ , $p=0.365$<br><br>Proximal colon cancer<br>$I^2=63.8$ , $p=0.017$<br>Distal colon cancer |

| Study Country (Reference)            | Search period and databases searched | Inclusion / exclusion criteria                                                                                                                                                                                                                                                                                                                                                                          | Intervention                          | Control                          | Outcomes                                                            | Results                                                                                                                                                                                                                                      | Quality score Heterogeneity Publication bias                                                                                                                                                                                                                    |
|--------------------------------------|--------------------------------------|---------------------------------------------------------------------------------------------------------------------------------------------------------------------------------------------------------------------------------------------------------------------------------------------------------------------------------------------------------------------------------------------------------|---------------------------------------|----------------------------------|---------------------------------------------------------------------|----------------------------------------------------------------------------------------------------------------------------------------------------------------------------------------------------------------------------------------------|-----------------------------------------------------------------------------------------------------------------------------------------------------------------------------------------------------------------------------------------------------------------|
|                                      |                                      |                                                                                                                                                                                                                                                                                                                                                                                                         |                                       |                                  |                                                                     | Distal colon cancer<br><b>RR=0.78 (0.69;0.88)</b><br>Rectal cancer<br>RR= 0.82 (0.67;1.01)<br><br>Duration > 5 years<br><b>RR = 0.80 (0.68;0.94)</b>                                                                                         | I <sup>2</sup> =0%, p= 0.17<br>Rectal cancer<br>I <sup>2</sup> =51%, p=0.057<br><br>Duration > 5 years I <sup>2</sup><br>= 0%, p < 0.465<br><br><b>Publication biases</b><br>Egger's test<br>Overall p = 0.006<br>case-control p =<br>0.001<br>Cohort p = 0.809 |
| <b>MAGNESIUM</b>                     |                                      |                                                                                                                                                                                                                                                                                                                                                                                                         |                                       |                                  |                                                                     |                                                                                                                                                                                                                                              |                                                                                                                                                                                                                                                                 |
| Chen et al. 2012<br>China [19]       | Until July 2012<br>Pubmed            | <b>Inclusions:</b> 1) case-control and Cohort, 2) exposure was intake of dietary Mg or total Mg (dietary and supplements combined), 3) outcome was colorectal, colon or rectal cancer and, 4) RR estimates OR in nested case-control studies with corresponding 95% CI provided, or could be calculated using the raw data presented in the studies<br><br><b>Exclusions:</b> 1) Non prospective design | Magnesium intake*<br>highest category | Mg intake lowest category        | CRC risk ICC; 7 Cohort<br><br>N=338,979 for case-control and Cohort | Overall:<br>RR=0.89 (0.79;1.00)<br><b>Cohort:<br/>RR=0.87 (0.77;0.99)</b><br><br>Dose-response analysis increment of 50 mg/day CRC<br>RR=0.95(0.89;1.00)<br>Colon cancer<br><b>RR=0.93(0.88;0.99)</b><br>Rectal cancer<br>RR=0.93(0.83;1.04) | Quality not reported<br><br>Heterogeneity:<br>Overall:<br>I <sup>2</sup> = 0%, p = 0.46<br>Cohort:<br>I <sup>2</sup> = 0%, p = 0.43<br><br>Publication bias:<br>no indication of publication bias                                                               |
| Wark et al. 2012<br>Netherlands [18] | 1966-31 July 2011<br><br>Pubmed      | <b>Inclusions:</b> 1) presented RR estimates and their variances or sufficient data to obtain these effect measures, 2) if multiple publications presented findings on the same study population, only the most recent information was used                                                                                                                                                             | Magnesium intake*<br>highest category | Magnesium intake lowest category | CRC risk 6 Cohort<br><br>N=252,867 for Cohort                       | RR = 0.85 (0.71; 1.00)<br>Random-effects model<br><b>RR = 0.84 (0.73; 0.97)</b><br>fixed-effects models<br><br>NB: Dose response effect RR= 0.87 (0.75;                                                                                      | Quality not reported<br><br>Heterogeneity:<br>Overall: I <sup>2</sup> = 27%, p = 0.23<br><br>Publication bias:                                                                                                                                                  |

| Study Country (Reference)  | Search period and databases searched                            | Inclusion / exclusion criteria                                                                                                                                                                                                                                                                                                                                              | Intervention                          | Control                      | Outcomes                                                                                                                            | Results                                               | Quality score Heterogeneity Publication bias                                                                                                                                                                                                                                                                                                                                                                                                                                                                                                                                                     |
|----------------------------|-----------------------------------------------------------------|-----------------------------------------------------------------------------------------------------------------------------------------------------------------------------------------------------------------------------------------------------------------------------------------------------------------------------------------------------------------------------|---------------------------------------|------------------------------|-------------------------------------------------------------------------------------------------------------------------------------|-------------------------------------------------------|--------------------------------------------------------------------------------------------------------------------------------------------------------------------------------------------------------------------------------------------------------------------------------------------------------------------------------------------------------------------------------------------------------------------------------------------------------------------------------------------------------------------------------------------------------------------------------------------------|
|                            |                                                                 |                                                                                                                                                                                                                                                                                                                                                                             |                                       |                              |                                                                                                                                     | 1.01) per 100 mg/d                                    | no indication of publication bias                                                                                                                                                                                                                                                                                                                                                                                                                                                                                                                                                                |
| Ko et al., 2014 Korea [20] | Up to November 2012<br><br>PubMed, Cochrane Library, and SCOPUS | <b>Inclusions:</b> 1) case-control or Cohort studies on the relationship between magnesium intakes and cancer, 2) human; 3) dietary magnesium; and 4) cancer incidence regardless of cancer types.<br><br><b>Exclusions:</b> 1) supplementary magnesium or with magnesium from drinking water, 2) in vitro 3) mortality, and 4) review articles, letters, and case reports. | Magnesium intake*<br>highest category | Mg intake<br>lowest category | CRC risk**<br>4 Cohort and case-control<br><br>N=1,236,004 for case-control and Cohort for all cancer outcomes (unk for colorectal) | <b>RR = 0.78 (0.66; 0.92)</b><br>fixed-effects models | Yes, using the NOS, mean of NOS was 5.7 stars in case-control studies and 7.4 stars in cohort studies. Based on this data, we decided the NOS cut-off for a high-quality study to be $\geq 6$ stars for case-control study and $\geq 8$ stars for cohort studies.<br>4 high-quality case-control studies and 5 high-quality prospective cohort studies<br><br>Heterogeneity:<br>Overall: $I^2 = 17\%$<br><br>Publication bias:<br>Publication for overall cancer (unk for colorectal)<br>Heterogeneity:<br>Overall: $I^2 = 17\%$<br>Publication bias:<br>for overall cancer (unk for colorectal) |
| <b>FOLIC ACID</b>          |                                                                 |                                                                                                                                                                                                                                                                                                                                                                             |                                       |                              |                                                                                                                                     |                                                       |                                                                                                                                                                                                                                                                                                                                                                                                                                                                                                                                                                                                  |

| Study Country (Reference)        | Search period and databases searched                   | Inclusion / exclusion criteria                                                                                                                                                                                                                                                                                                                                                                                   | Intervention                                                                                                          | Control                       | Outcomes                                         | Results                                                                                                                                                                                                                                                                                                                                                                                  | Quality score Heterogeneity Publication bias                                                                                                                      |
|----------------------------------|--------------------------------------------------------|------------------------------------------------------------------------------------------------------------------------------------------------------------------------------------------------------------------------------------------------------------------------------------------------------------------------------------------------------------------------------------------------------------------|-----------------------------------------------------------------------------------------------------------------------|-------------------------------|--------------------------------------------------|------------------------------------------------------------------------------------------------------------------------------------------------------------------------------------------------------------------------------------------------------------------------------------------------------------------------------------------------------------------------------------------|-------------------------------------------------------------------------------------------------------------------------------------------------------------------|
| Kennedy et al., 2011 Canada [21] | up to October 2009<br><br>MEDLINE, Embase and Scopus   | <b>Inclusions:</b> 1) observational studies, 2) folate exposure (dietary or total) 3) at least two levels of folate intake, 4) association with rates of colorectal, colon and/or rectal cancer.<br><br><b>Exclusions:</b> 1) no clear levels of folic acid intake.                                                                                                                                              | High Folate intake (dietary or total) <sup>1</sup><br>Cohort : FU 8-22years<br><br>case-control: 1-2 year before diag | Low folate intake             | CRC incidence<br><br>18 case-control<br>9 Cohort | Total folate<br><b>Cohort:</b><br><b>RR=0.85(0.74;0.99)</b><br><br>Dietary folate case-control:<br>RR=0.87(0.74;1.02)<br>Cohort:<br>RR=0.92(0.81;1.05)<br><br>Rectal cancer only:<br>case-control:<br>RR=0.89(0.64;1.25)<br>Colon cancer only case-control:<br>RR=1.03(0.88;1.20)<br><b>Cohort:</b><br><b>RR=0.75(0.57;0.99)</b><br><br>Men only:<br>case-control:<br>RR=0.89(0.66;1.19) | Quality performed: Downs and Black scoring tool<br><br>Heterogeneity: Total folate I <sup>2</sup> = 11%; p = 0.34,<br><br>Publication bias: some publication bias |
| Heine-Bröring et al., 2015 [22]  | Up to January 2013<br><br>Medline, Embase and Cochrane | <b>Inclusions:</b> prospective Cohort studies if they reported original and peer-reviewed data on the association of dietary supplement use and colorectal, colon, or rectal cancer incidence. To be included in the meta-analyses, information on ascertainment of CRC cases, and estimates of the RR with 95% CI were required<br><br><b>Exclusions:</b> studies on colorectal adenomas, RCTs and case-control | Highest level of folate intake<br>FU : 8-24yrs                                                                        | Lowest level of folate intake | CRC incidence<br><br>3 Cohort                    | <b>RR=0.88(0.78;0.98)</b>                                                                                                                                                                                                                                                                                                                                                                | Quality performed: none<br><br>Heterogeneity: I <sup>2</sup> =6%; p=0.34<br><br>Publication bias: not reported                                                    |



| Study Country (Reference)        | Search period and databases searched                                                                                        | Inclusion / exclusion criteria                                                                                                                                                                                                                                                                                                                                                            | Intervention                               | Control                       | Outcomes                                                                                                   | Results                                                           | Quality score Heterogeneity Publication bias                                                                                                                        |
|----------------------------------|-----------------------------------------------------------------------------------------------------------------------------|-------------------------------------------------------------------------------------------------------------------------------------------------------------------------------------------------------------------------------------------------------------------------------------------------------------------------------------------------------------------------------------------|--------------------------------------------|-------------------------------|------------------------------------------------------------------------------------------------------------|-------------------------------------------------------------------|---------------------------------------------------------------------------------------------------------------------------------------------------------------------|
| Liu et al., 2015<br>China [23]   | Up to April 2014<br><br>Pubmed                                                                                              | <b>Inclusions:</b> [1] Cohort studies [2]; the exposure of interest was vitamin or multiple-vitamin supplement intake [3] the outcome of interest was the incidence of colorectal, colon, or rectal cancer [4] relative risk (RR) or OR estimates with 95 % CI were reported.<br><br><b>Exclusions:</b> Articles with <6 stars.                                                           | Highest level of Folate intake             | Lowest level of Folate intake | <b>CRC incidence</b><br><br>19 Cohort                                                                      | <b>RR=0.88(0.81;0.95)</b><br>Random effect model                  | Quality performed:<br>NOS 8-6 stars<br><br>Heterogeneity:<br>I <sup>2</sup> =43%, p=0.02<br><br>Publication bias:<br>p=0.08                                         |
| <b>FOLIC ACID In Combination</b> |                                                                                                                             |                                                                                                                                                                                                                                                                                                                                                                                           |                                            |                               |                                                                                                            |                                                                   |                                                                                                                                                                     |
| Carroll et al., 2010<br>UK [24]  | Up to June 2008<br><br>Cochrane Library, MEDLINE, PreMEDLINE, CINAHL, EMBASE, Web of Science, BIOSIS and Research Registers | <b>Inclusions:</b> 1) RCTs, 2) folic acid or folate, 3) with or without other agents,<br><br><b>Population:</b> No increased risk CRC 3 studies (for CRC incidence)                                                                                                                                                                                                                       | Folic Acid + Vit B vitamins ± antioxidants | Placebo ± antioxidants        | CRC incidence*<br><br>3 RCT<br>N=11,062                                                                    | RR=1.13(0.77; 1.64)<br>Random effect model                        | Quality performed with a published scale<br><br>Heterogeneity:<br>Overall: I <sup>2</sup> = 7%, p=0.34<br><br>Publication bias:<br>unk for CRC                      |
| Wien et al. 2012<br>Norway [26]  | Up to March 2010<br><br>(May 2010/31 January 2011) (non-systematic)<br><br>Cochrane Library, Medline, Embase                | <b>Inclusions:</b> 1) RCTs, case-control or Cohort, 2) assessed cancer incidence and/or cancer mortality, 3) any population taking folic acid supplements ≥0.4 mg/day by oral route for any indication<br><br><b>Exclusions:</b> 1) folic acid given as part of high-dose cytostatic regimen of cancer treatment.<br><br><b>Population:</b> Seven RCTs were performed in populations with | Folic acid ≥ 0.4mg/day ± other Vit         | Any control                   | CRC incidence*<br>9 RCT<br>1 Cohort<br><br>10 RCTs reporting overall cancer incidence<br>N=38 233 (unk for | RCT:<br>RR=1.00(0.83; 1.21)<br><br>Cohort:<br>RR=0.45(0.05; 3.92) | Quality performed:<br>yes<br><br>Heterogeneity:<br>I <sup>2</sup> = 0%; (unk for CRC)<br><br>Publication bias:<br>No indication based on forest plots (unk for CRC) |

| Study Country (Reference)        | Search period and databases searched                               | Inclusion / exclusion criteria                                                                                                                                                                                                                                                                                                                                                                       | Intervention                                                          | Control                 | Outcomes                                                            | Results                                                                                                    | Quality score<br>Heterogeneity<br>Publication bias                                                                                        |
|----------------------------------|--------------------------------------------------------------------|------------------------------------------------------------------------------------------------------------------------------------------------------------------------------------------------------------------------------------------------------------------------------------------------------------------------------------------------------------------------------------------------------|-----------------------------------------------------------------------|-------------------------|---------------------------------------------------------------------|------------------------------------------------------------------------------------------------------------|-------------------------------------------------------------------------------------------------------------------------------------------|
|                                  | and Centre of Reviews and Dissemination, clinical trial registries | cardiovascular disease or high-risk groups for cardiovascular disease, three were in populations with a history of colorectal adenoma, one in a population with atrophic gastritis and one was performed in pregnant women.                                                                                                                                                                          |                                                                       |                         | CRC)                                                                |                                                                                                            |                                                                                                                                           |
| Qin et al. 2015<br>China<br>[25] | up to October 2014<br><br>Pubmed and Embase                        | <b>Inclusions:</b> 1) RCT, 2) correlation between folic acid supplementation and colorectal cancer risk, 3) RR with a 95% CI or the number of colorectal cancer events was reported; 4) the supplementary folic acid level was stated; 5) published in English.<br><br><b>Population:</b> Vascular disease, diabetes, CR adenoma, cardiovascular disease, stroke, transient ischemic attack, general | Folic acid supplementati on 0.5mg to 2.5mg/day ± vit B6, B12, Aspirin | placebo                 | CRC incidence<br><br>8 RCTs<br>N= 34,598                            | RR=1.00(0.82; 1.22)<br><br>Male only:<br>RR=1.01(0.82; 1.23)                                               | Quality performed: yes<br><br>Heterogeneity: I <sup>2</sup> = 0%; p = 0.82,<br><br>Publication bias: Egger=0.33                           |
| <b>DAIRY PRODUCTS</b>            |                                                                    |                                                                                                                                                                                                                                                                                                                                                                                                      |                                                                       |                         |                                                                     |                                                                                                            |                                                                                                                                           |
| Aune et al., 2012<br>UK<br>[28]  | Up to May2010                                                      | <b>Inclusions:</b> 1) Cohort or case-control, 2) total dairy products or specific types of dairy products and colorectal cancer incidence                                                                                                                                                                                                                                                            | High total dairy product                                              | Low total dairy product | CRC Risk<br>12 Cohort<br><br>1,170,942 participants<br>11,579 cases | <b>RR=0.81(0.74;0.90)</b><br><br>Dose response 400 g increase per day (g/day)<br><b>RR=0.83(0.78;0.88)</b> | Quality not reported<br><br><b>Heterogeneity:</b> p=0.06; I <sup>2</sup> =42%<br><br><b>Publication bias:</b> Egger p=0.58<br>Begg p=0.79 |
|                                  |                                                                    |                                                                                                                                                                                                                                                                                                                                                                                                      |                                                                       |                         | Colon<br>5 Cohort                                                   | RR= 0.72(0.51;1.02)<br>Dose response 400 g increase per day (g/day)<br><b>RR=0.84(0.72;0.97)</b>           | <b>Heterogeneity:</b> p=0.09; I <sup>2</sup> =50%                                                                                         |
|                                  |                                                                    |                                                                                                                                                                                                                                                                                                                                                                                                      |                                                                       |                         | Rectal<br>5 Cohort                                                  | RR=0.96(0.65;1.41)<br>Dose response 400 g increase per day (g/day)                                         | <b>Heterogeneity:</b> p=0.13; I <sup>2</sup> =44%                                                                                         |

| Study Country (Reference) | Search period and databases searched | Inclusion / exclusion criteria | Intervention            | Control                | Outcomes                                                                           | Results                                                                                                | Quality score<br>Heterogeneity<br>Publication bias                                                                                              |
|---------------------------|--------------------------------------|--------------------------------|-------------------------|------------------------|------------------------------------------------------------------------------------|--------------------------------------------------------------------------------------------------------|-------------------------------------------------------------------------------------------------------------------------------------------------|
|                           |                                      |                                |                         |                        |                                                                                    | RR=1.00(0.77;1.28)                                                                                     |                                                                                                                                                 |
|                           |                                      |                                | Milk high consumption   | Milk low consumption   | CRC 10 Cohort<br>655,483 participants<br>5,011 cases                               | <b>RR=0.83(0.74;0.93)</b><br>Dose response 200 g increase per day (g/day)<br><b>RR=0.90(0.85;0.94)</b> | Quality not reported<br><br><b>Heterogeneity:</b><br>p=0.31; I <sup>2</sup> =14%<br><br><b>Publication bias:</b><br>Egger p=0.86<br>Begg p=0.84 |
|                           |                                      |                                |                         |                        | Colon 4 Cohort                                                                     | <b>RR=0.82(0.72;0.94)</b><br>Dose response 200 g increase per day (g/day)<br><b>RR=0.88(0.79;0.97)</b> | <b>Heterogeneity:</b><br>p=0.54; I <sup>2</sup> =0%                                                                                             |
|                           |                                      |                                |                         |                        | Rectal 4 Cohort                                                                    | RR=0.79(0.60;1.06)<br>Dose response 200 g increase per day (g/day)<br>RR=0.90(0.79;1.02)               | <b>Heterogeneity:</b><br>p=0.79; I <sup>2</sup> =0%                                                                                             |
|                           |                                      |                                | Cheese high consumption | Cheese low consumption | <b>CRC Risk</b><br><b>177,551 participants</b><br><b>1,635 cases</b><br><b>7Co</b> | RR=0.94(0.75;1.18)<br>Dose response 50 g increase per day (g/day)<br>RR=0.96(0.83;1.12)                | Quality not reported<br><br><b>Heterogeneity:</b><br>p=0.14; I <sup>2</sup> =39%<br><br><b>Publication bias:</b><br>Egger p=0.86<br>Begg p=0.84 |
|                           |                                      |                                |                         |                        | Colon 5 Cohort                                                                     | RR=1.04(0.69;1.55)<br>Dose response 50 g increase per day (g/day)<br>RR=0.84(0.68;1.04)                | <b>Heterogeneity:</b><br><b>p=0.05; I<sup>2</sup>=58%</b>                                                                                       |
|                           |                                      |                                |                         |                        | Rectal 3 Cohort                                                                    | RR=0.88(0.59;1.30)<br>Dose response 50 g                                                               | <b>Heterogeneity:</b><br>p=0.84; I <sup>2</sup> =0%                                                                                             |

| Study Country (Reference)           | Search period and databases searched | Inclusion / exclusion criteria                                                                                                                                                                                                                                                  | Intervention                                                                                                                             | Control                                                                                                                           | Outcomes                                                       | Results                                                                                                                                                                                                                                                                                                                                                                                                                                                                                                                     | Quality score Heterogeneity Publication bias                                                                                                                                                                                                                                                                                                                                                                                                                         |
|-------------------------------------|--------------------------------------|---------------------------------------------------------------------------------------------------------------------------------------------------------------------------------------------------------------------------------------------------------------------------------|------------------------------------------------------------------------------------------------------------------------------------------|-----------------------------------------------------------------------------------------------------------------------------------|----------------------------------------------------------------|-----------------------------------------------------------------------------------------------------------------------------------------------------------------------------------------------------------------------------------------------------------------------------------------------------------------------------------------------------------------------------------------------------------------------------------------------------------------------------------------------------------------------------|----------------------------------------------------------------------------------------------------------------------------------------------------------------------------------------------------------------------------------------------------------------------------------------------------------------------------------------------------------------------------------------------------------------------------------------------------------------------|
|                                     |                                      |                                                                                                                                                                                                                                                                                 |                                                                                                                                          |                                                                                                                                   |                                                                | increase per day (g/day)<br>RR=0.90(0.70;1.15)                                                                                                                                                                                                                                                                                                                                                                                                                                                                              |                                                                                                                                                                                                                                                                                                                                                                                                                                                                      |
| Ralston et al., 2014 Australia [29] | January 2002 to July 2009            | <b>Inclusion:</b> 1) English language, 2) human population, 3) keywords relating only to dairy and CRC<br><br><b>Exclusion:</b> 1) calcium or vitamin D intake rather than dairy food intake, or 2) examined total dairy food intake rather than specific types of dairy foods. | Highest category (ranged from >35 to >976 g non-fermented milk/day, >8 to >70 g solid cheese/day, and >110 to >350 g fermented milk/day) | Lowest category (ranged from 0 to <407, <2.5 to <30, and 0 to <32 g/day for non-fermented milk, solid cheese, and fermented milk) | CRC risk<br><br>15 Cohort<br><br>919,680 subjects, 5,200 cases | Non fermented milk overall :<br><b>RR=0.85(0.77; 0.93)</b><br>(in the highest category of intake average: 439 g non fermented milk/day).<br><br>Subgroup:<br>CRC men<br><b>RR=0.79(0.69; 0.91)</b> ,<br>CRC women<br>RR=0.83(0.68;1.02)<br><br>Solid cheese overall<br>RR=1.11 (0.90; 1.36)<br>Subgroup:<br>CRC men<br>RR=0.94 (0.58; 1.54)<br>CRC Women<br>RR=1.16 (0.82;1.63)<br><br>Fermented milk overall<br>RR=1.01 (0.89; 1.15),<br>Subgroup:<br>CRC men<br>RR=1.08 (0.90; 1.29)<br>CRC women<br>RR=0.93 (0.87; 1.12) | <b>Individual quality performed</b><br><br><b>Heterogeneity:</b><br>Non fermented milk overall CRC: I <sup>2</sup> =0%<br><u>Men</u><br>CRC 0%<br>colon I <sup>2</sup> =0%, rectal I <sup>2</sup> =0%,<br><u>Women</u><br>CRC 42%<br>Colon I <sup>2</sup> =0%, rectal I <sup>2</sup> =0%,<br><br>Solid Cheese CRC I <sup>2</sup> =16%<br>solid cheese CRC men 43%, solid cheese CRC Women 11%<br><br>Fermented milk overall 0%<br>men I <sup>2</sup> =0%<br>women 0% |
|                                     |                                      |                                                                                                                                                                                                                                                                                 |                                                                                                                                          |                                                                                                                                   | Colon                                                          | Non Fermented milk men:<br><b>RR=0.74 (0.60; 0.91)</b><br>women :                                                                                                                                                                                                                                                                                                                                                                                                                                                           |                                                                                                                                                                                                                                                                                                                                                                                                                                                                      |

| Study Country (Reference)         | Search period and databases searched | Inclusion / exclusion criteria                                                                                                                                                                                                                        | Intervention                                                     | Control | Outcomes | Results                                                                            | Quality score<br>Heterogeneity<br>Publication bias                                                                                                 |
|-----------------------------------|--------------------------------------|-------------------------------------------------------------------------------------------------------------------------------------------------------------------------------------------------------------------------------------------------------|------------------------------------------------------------------|---------|----------|------------------------------------------------------------------------------------|----------------------------------------------------------------------------------------------------------------------------------------------------|
|                                   |                                      |                                                                                                                                                                                                                                                       |                                                                  |         |          | RR=1.03 (0.78; 1.36),                                                              |                                                                                                                                                    |
|                                   |                                      |                                                                                                                                                                                                                                                       |                                                                  |         | Rectal   | Non fermented milk men:<br>RR=0.81 (0.60; 1.09)<br>women:<br>RR=0.82 (0.56; 1.21), |                                                                                                                                                    |
| Vieira et al, 2017*<br>UK<br>[27] | Up to May 2015                       | Inclusion: 1) RCT, Cohort or case-control design, 2) report adjusted estimates of the RR and 95% CIs for the association of foods and CRC incidence; 3) for dose-response meta-analysis, studies should provide a quantitative measure of the intake. | Total diary product<br>Dose response<br>Incremental of 400 g/day |         | CRC      | <b>RR=0.87 (0.83; 0.90)</b>                                                        | High quality studies but not detailed<br><br><b>Heterogeneity:</b><br>p=0.14; I <sup>2</sup> =18%<br><br><b>Publication bias:</b><br>none detected |
|                                   |                                      |                                                                                                                                                                                                                                                       |                                                                  |         | Colon    | <b>RR=0.87 (0.81; 0.94)</b>                                                        | High quality studies but not detailed<br><br><b>Heterogeneity:</b><br>p=0.25; I <sup>2</sup> =24%<br><br><b>Publication bias:</b><br>none detected |
|                                   |                                      |                                                                                                                                                                                                                                                       |                                                                  |         | Rectal   | RR= 0.93 (0.82; 1.06)                                                              | High quality studies but not detailed<br><br><b>Heterogeneity:</b><br>NS<br><br><b>Publication bias:</b><br>none detected                          |
|                                   |                                      |                                                                                                                                                                                                                                                       | Milk product<br>Dose response<br>Incremental of 200 g/day        |         | CRC      | <b>RR= 0.94 (0.92; 0.96)</b>                                                       | High quality studies but not detailed<br><br><b>Heterogeneity:</b><br>p=0.97; I <sup>2</sup> =0%                                                   |

| Study Country (Reference)   | Search period and databases searched | Inclusion / exclusion criteria                                                                                           | Intervention                                               | Control                                          | Outcomes                                  | Results                                                                              | Quality score<br>Heterogeneity<br>Publication bias                                                                                                 |
|-----------------------------|--------------------------------------|--------------------------------------------------------------------------------------------------------------------------|------------------------------------------------------------|--------------------------------------------------|-------------------------------------------|--------------------------------------------------------------------------------------|----------------------------------------------------------------------------------------------------------------------------------------------------|
|                             |                                      |                                                                                                                          |                                                            |                                                  |                                           |                                                                                      | <b>Publication bias:</b><br>none detected                                                                                                          |
|                             |                                      |                                                                                                                          |                                                            |                                                  | <b>Colon</b><br>9 Cohort or case-control  | <b>RR= 0.93 (0.90; 0.96)</b>                                                         | High quality studies but not detailed<br><br><b>Heterogeneity:</b><br>p=0.18; I <sup>2</sup> =30%<br><br><b>Publication bias:</b><br>none detected |
|                             |                                      |                                                                                                                          |                                                            |                                                  | <b>Rectal</b><br>7 Cohort or case-control | <b>RR= 0.94 (0.91; 0.97)</b>                                                         | High quality studies but not detailed<br><br><b>Heterogeneity:</b><br>p=0.93; I <sup>2</sup> =0%<br><br><b>Publication bias:</b><br>none detected  |
|                             |                                      |                                                                                                                          | Cheese product<br>Dose response<br>Incremental of 50 g/day |                                                  | <b>CRC</b><br>9 Cohort or case-control    | RR=0.94 (0.87; 1.02)                                                                 | High quality studies but not detailed                                                                                                              |
|                             |                                      |                                                                                                                          |                                                            | <b>Colon</b><br>9 Cohort or case-control         | RR=0.91 (0.80; 1.03)                      | NS                                                                                   |                                                                                                                                                    |
|                             |                                      |                                                                                                                          |                                                            | <b>Rectal</b><br>4 Cohort or case-control        | RR=0.95 (0.90; 1.00)                      | <b>Publication bias:</b><br>none detected                                            |                                                                                                                                                    |
| <b>FIBER</b>                |                                      |                                                                                                                          |                                                            |                                                  |                                           |                                                                                      |                                                                                                                                                    |
| Trock et al., 1990 USA [31] | 1970 up to 1988                      | <b>Inclusions:</b> All epidemiologic studies concerning CRC and fiber, vegetables, grains, or fruit published in English | High intake total dietary fiber (varying cut-off)          | Low intake total dietary fiber (varying cut-off) | <b>CRC risk</b><br>10CC                   | Combined<br><b>OR=0.57 (0.50; 0.64)</b><br><br>Fiber:<br><b>OR=0.58 (0.51; 0.66)</b> | Quality not reported<br><br><b>Heterogeneity:</b><br>p<0.01                                                                                        |

| Study Country (Reference)           | Search period and databases searched | Inclusion / exclusion criteria                                                                                                                                               | Intervention                                      | Control                                          | Outcomes                                                              | Results                                                                                                     | Quality score<br>Heterogeneity<br>Publication bias                                                          |
|-------------------------------------|--------------------------------------|------------------------------------------------------------------------------------------------------------------------------------------------------------------------------|---------------------------------------------------|--------------------------------------------------|-----------------------------------------------------------------------|-------------------------------------------------------------------------------------------------------------|-------------------------------------------------------------------------------------------------------------|
| Haas et al., 2009<br>Brazil<br>[32] | 1950 up to December 2006             | <b>Inclusions:</b> epidemiological studies of cohorts that evaluated the effectiveness of whole grains in the prevention of CRC by means of questionnaires on feed frequency | High intake total dietary fiber (varying cut-off) | Low intake total dietary fiber (varying cut-off) | <b>CRC risk</b><br><br>10 Cohort<br>7,745 cases<br>1,719,590 patients | Highest quintile:<br>RR= 0.94 (0.85; 1.03)<br><br>Lowest quintile<br>RR=0.96 (0.88; 1.04)                   | Quality not reported<br><br><b>Heterogeneity not reported</b>                                               |
| Aunes et al., 2011<br>UK<br>[30]    | Up to December 2010                  | <b>Inclusions:</b> 1) Cohort or case-control, 2) investigate the association between dietary fiber or whole grain intake and incidence of colorectal cancer                  | High intake total dietary fiber                   | Low intake total dietary fiber                   | CRC Risk<br><br>19 Cohort or case-control                             | <b>RR=0.88 (0.82; 0.94)</b><br><br>Dose response analysis<br>10 g/day intake<br><b>RR=0.90 (0.86; 0.94)</b> | Quality not reported<br><br><b>Heterogeneity:</b><br>p=0.48; I <sup>2</sup> =0%<br><br>No publication bias  |
|                                     |                                      |                                                                                                                                                                              | Fruit fiber high intake                           | Fruit fiber low intake                           | CRC risk<br><br>9 Cohort                                              | RR= 0.94 (0.85; 1.04)<br><br>Dose response analysis<br>10 g/day intake<br>RR=0.93 (0.82; 1.05)              | Quality not reported<br><br><b>Heterogeneity:</b><br>p=0.11; I <sup>2</sup> =39%<br><br>No publication bias |
|                                     |                                      |                                                                                                                                                                              | Vegetable fiber high intake                       | Vegetable fiber low intake                       | CRC risk<br><br>9 Cohort                                              | RR= 0.98 (0.91; 1.06)<br><br>Dose response analysis<br>10 g/day intake<br>RR=0.98 (0.91; 1.06)              | Quality not reported<br><br><b>Heterogeneity:</b><br>p=0.48; I <sup>2</sup> =0%<br><br>No publication bias  |
|                                     |                                      |                                                                                                                                                                              | Legume fiber high intake                          | Legume fiber low intake                          | CRC risk<br><br>4 Cohort                                              | RR= 0.89 (0.78; 1.02)<br><br>Dose response analysis<br>10 g/day intake<br>RR=0.62 (0.27; 1.42)              | Quality not reported<br><br><b>Heterogeneity:</b><br>p=0.17; I <sup>2</sup> =41%<br><br>No publication bias |
|                                     |                                      |                                                                                                                                                                              | Cereal fiber high intake                          | Cereal fiber low intake                          | CRC risk<br><br>8 Cohort                                              | <b>RR= 0.90 (0.83; 0.96)</b><br><br>Dose response analysis<br>10 g/day intake<br>RR=0.62 (0.27; 1.42)       | Quality not reported<br><br><b>Heterogeneity:</b><br>p=0.94; I <sup>2</sup> =0%<br><br>No publication bias  |

| Study Country (Reference)               | Search period and databases searched | Inclusion / exclusion criteria                                                                                                                                                                                                                                                                                                                                                                                                                                                                                                    | Intervention                                            | Control                                          | Outcomes                                          | Results                                                                                                                      | Quality score Heterogeneity Publication bias                                                                |
|-----------------------------------------|--------------------------------------|-----------------------------------------------------------------------------------------------------------------------------------------------------------------------------------------------------------------------------------------------------------------------------------------------------------------------------------------------------------------------------------------------------------------------------------------------------------------------------------------------------------------------------------|---------------------------------------------------------|--------------------------------------------------|---------------------------------------------------|------------------------------------------------------------------------------------------------------------------------------|-------------------------------------------------------------------------------------------------------------|
|                                         |                                      |                                                                                                                                                                                                                                                                                                                                                                                                                                                                                                                                   | Whole grain high intake                                 | Whole grain low intake                           | CRC risk<br>7 Cohort                              | <b>RR= 0.79 (0.72; 0.86)</b><br><br>Dose response analysis<br>90 g/day (3 servings)<br>intake<br><b>RR=0.83 (0.78; 0.89)</b> | Quality not reported<br><br><b>Heterogeneity:</b><br>p=0.98; I <sup>2</sup> =0%<br><br>No publication bias  |
| Vieira et al, 2017*<br>UK<br>[27]       | Up to May 2015                       | <b>Inclusion:</b> 1) RCT, Cohort or case-control design, 2) report adjusted estimates of the RR and 95% CIs for the association of foods and CRC incidence; 3) for dose–response meta-analysis, studies should provide a quantitative measure of the intake.                                                                                                                                                                                                                                                                      | Whole grains<br>Dose response<br>Incremental of 90g/day |                                                  | CRC risk<br>6 Cohort                              | <b>RR= 0.83 (0.79; 0.89)</b>                                                                                                 | Quality not reported<br><br><b>Heterogeneity:</b><br>p=0.30; I <sup>2</sup> =18%<br><br>No publication bias |
|                                         |                                      |                                                                                                                                                                                                                                                                                                                                                                                                                                                                                                                                   |                                                         |                                                  | Colon<br>4 Cohort                                 | <b>RR=0.82 (0.73; 0.92)</b>                                                                                                  | <b>Heterogeneity:</b><br>p=0.49; I <sup>2</sup> =0%                                                         |
|                                         |                                      |                                                                                                                                                                                                                                                                                                                                                                                                                                                                                                                                   |                                                         |                                                  | Rectal<br>3 Cohort                                | RR=0.81 (0.54; 1.20)                                                                                                         | <b>Heterogeneity:</b><br>P<0.01; I <sup>2</sup> =91%                                                        |
| Gianfredi et al., 2018<br>Italy<br>[33] | Up to October 2016<br>Pubmed         | <b>Inclusions :</b> 1) articles in English only; 2) full text articles; 3) performed on humans; 4) focussed on fibre intake; 5) epidemiological studies evaluating the relationship between fibre intake and risk of colon cancer alone.<br><br><b>Exclusions:</b> 1) all the studies evaluating colon and rectal cancer in combination 2) different outcome; 3) studies without proper sufficient statistics 4) in vitro model studies; 5) animal model studies; 6) experimental animal models; 7) studies without original data | High intake total dietary fiber (varying cut-off)       | Low intake total dietary fiber (varying cut-off) | Colon<br>25 case-control or Cohort<br>N=2,627,391 | <b>RR=0.74 (0.67; 0.82)</b><br><br>Subgroup<br>Female:<br>RR=0.88 (0.73; 1.05),<br>Male:<br>RR=0.92 (0.81; 1.04)             | <b>Heterogeneity:</b><br>P=0.01; I <sup>2</sup> =44%<br><br>No publication bias                             |
| <b>FRUIT AND VEGETABLE</b>              |                                      |                                                                                                                                                                                                                                                                                                                                                                                                                                                                                                                                   |                                                         |                                                  |                                                   |                                                                                                                              |                                                                                                             |
| Trock et al., 1990<br>USA<br>[31]       | 1970 up to 1988                      | <b>Inclusions:</b> All epidemiologic studies concerning CRC and fiber, vegetables, grains, or fruit published in English                                                                                                                                                                                                                                                                                                                                                                                                          | High intake total vegetable                             | Low intake total vegetable                       | <b>CRC risk</b><br><br>10CC                       | Vegetable<br><b>OR=0.48 (0.41; 0.57)</b>                                                                                     | Quality not reported<br><br><b>Heterogeneity:</b><br>p<0.01                                                 |



| Study<br>Country<br>(Reference)           | Search period<br>and databases<br>searched | Inclusion / exclusion criteria                                                                                                                                                                                                                                                                                                                        | Intervention                                   | Control                                       | Outcomes                               | Results                                    | Quality score<br>Heterogeneity<br>Publication bias   |
|-------------------------------------------|--------------------------------------------|-------------------------------------------------------------------------------------------------------------------------------------------------------------------------------------------------------------------------------------------------------------------------------------------------------------------------------------------------------|------------------------------------------------|-----------------------------------------------|----------------------------------------|--------------------------------------------|------------------------------------------------------|
| Huxley et al., 2009*<br>Australia<br>[34] | 1996 to January 2008                       | <b>Inclusions:</b> 1) published quantitative estimates and standard errors (or some other measure of variability) of the association between each risk factor and 2) CRC<br><br><b>Exclusions:</b> 1) provided only an estimate of effect, with no means by which to calculate the standard error, or if the estimates were not at least age adjusted | High intake total fruit                        | Low intake total fruit                        | CRC Risk                               | RR=0.99 (0.90; 1.08)                       | Quality not reported                                 |
|                                           |                                            |                                                                                                                                                                                                                                                                                                                                                       |                                                |                                               | 16 Cohort                              |                                            | <b>Heterogeneity:</b><br>p=0.11                      |
|                                           |                                            |                                                                                                                                                                                                                                                                                                                                                       |                                                |                                               | Colon                                  | RR=1.01 (0.86; 1.18)                       | Publication bias:<br>Egger p=0.30                    |
|                                           |                                            |                                                                                                                                                                                                                                                                                                                                                       |                                                |                                               | Rectal                                 | <b>RR=0.78 (0.63; 0.97)</b>                | <b>Heterogeneity:</b><br>p=0.06                      |
|                                           |                                            |                                                                                                                                                                                                                                                                                                                                                       | High intake vegetable                          | Low intake vegetable                          | CRC Risk                               | RR=0.95 (0.88; 1.04)                       | Quality not reported                                 |
|                                           |                                            |                                                                                                                                                                                                                                                                                                                                                       |                                                |                                               | 16 Cohort                              |                                            | <b>Heterogeneity:</b><br>p=0.18                      |
| Colon                                     | RR=0.93 (0.85; 1.10)                       | Publication bias:<br>Egger p=0.29                                                                                                                                                                                                                                                                                                                     |                                                |                                               |                                        |                                            |                                                      |
|                                           |                                            | Rectal                                                                                                                                                                                                                                                                                                                                                | RR=0.88 (0.69; 1.12)                           | -                                             |                                        |                                            |                                                      |
| Aune et al., 2011<br>UK<br>[35]           | Up to May 2010                             | <b>Inclusions:</b> 1) Cohort or case-control, 2) fruit and vegetable intake and colorectal cancer risk.                                                                                                                                                                                                                                               | High intake total fruit and vegetable combined | Low intake total fruit and vegetable combined | CRC Risk                               | <b>RR=0.92 (0.86; 0.99)</b>                | Quality not reported                                 |
|                                           |                                            |                                                                                                                                                                                                                                                                                                                                                       |                                                |                                               | 11 Cohort                              | Dose response analysis<br>100 g/day intake | <b>Heterogeneity:</b><br>p=0.24; I <sup>2</sup> =22% |
|                                           |                                            |                                                                                                                                                                                                                                                                                                                                                       |                                                |                                               | 1,523,860 participants<br>11,853 cases | <b>RR=0.98 (0.97; 0.99)</b>                | Publication bias:<br>Egger p=0.52                    |
|                                           |                                            |                                                                                                                                                                                                                                                                                                                                                       |                                                |                                               | Colon                                  | <b>RR=0.91 (0.84; 0.99)</b>                | Quality not reported                                 |
|                                           |                                            |                                                                                                                                                                                                                                                                                                                                                       |                                                |                                               | 12 Cohort                              |                                            | <b>Heterogeneity:</b><br>p=0.32; I <sup>2</sup> =13% |
| Rectal                                    | RR= 0.97 (0.86; 1.09)                      | Quality not reported                                                                                                                                                                                                                                                                                                                                  |                                                |                                               |                                        |                                            |                                                      |
| 10 Cohort                                 |                                            | <b>Heterogeneity:</b><br>p=0.65; I <sup>2</sup> =0%                                                                                                                                                                                                                                                                                                   |                                                |                                               |                                        |                                            |                                                      |
| High intake                               | Low intake                                 | CRC Risk                                                                                                                                                                                                                                                                                                                                              | <b>RR= 0.90 (0.83; 0.98)</b>                   | Quality not reported                          |                                        |                                            |                                                      |

| Study Country (Reference) | Search period and databases searched | Inclusion / exclusion criteria | Intervention                                  | Control                          | Outcomes                                                                                                                                                                                                                                                                      | Results                                                                   | Quality score<br>Heterogeneity<br>Publication bias                                                                       |                                                                |                                                                                                          |                                                                                                                                      |
|---------------------------|--------------------------------------|--------------------------------|-----------------------------------------------|----------------------------------|-------------------------------------------------------------------------------------------------------------------------------------------------------------------------------------------------------------------------------------------------------------------------------|---------------------------------------------------------------------------|--------------------------------------------------------------------------------------------------------------------------|----------------------------------------------------------------|----------------------------------------------------------------------------------------------------------|--------------------------------------------------------------------------------------------------------------------------------------|
|                           |                                      |                                | total fruit                                   | total fruit                      | 14 Cohort                                                                                                                                                                                                                                                                     | Dose response analysis<br>100 g/day intake<br><b>RR=0.89 (0.81; 0.98)</b> | <b>Heterogeneity:</b><br>p=0.05; I <sup>2</sup> =42%<br><br>Publication bias:<br>Egger p=0.79                            |                                                                |                                                                                                          |                                                                                                                                      |
|                           |                                      |                                |                                               |                                  | Colon<br>11 Cohort                                                                                                                                                                                                                                                            | <b>RR=0.89 (0.81; 0.98)</b>                                               | Quality not reported<br><br><b>Heterogeneity:</b><br>p=0.14; I <sup>2</sup> =33%                                         |                                                                |                                                                                                          |                                                                                                                                      |
|                           |                                      |                                |                                               |                                  | Rectal<br>7 Cohort                                                                                                                                                                                                                                                            | RR=0.91 (0.76–1.09)                                                       | Quality not reported<br><br><b>Heterogeneity:</b><br>p=0.09; I <sup>2</sup> =45%                                         |                                                                |                                                                                                          |                                                                                                                                      |
|                           |                                      |                                | High intake<br>total vegetable                | Low intake<br>total<br>vegetable | CRC<br>15 Cohort                                                                                                                                                                                                                                                              | <b>RR=0.91 (0.86–0.96)</b>                                                | Quality not reported<br><br><b>Heterogeneity:</b><br>p=0.53; I <sup>2</sup> =0%<br><br>Publication bias:<br>Egger p=0.14 |                                                                |                                                                                                          |                                                                                                                                      |
|                           |                                      |                                |                                               |                                  | Colon<br>11 Cohort                                                                                                                                                                                                                                                            | <b>RR=0.87 (0.81; 0.94)</b>                                               | Quality not reported<br><br><b>Heterogeneity:</b><br>p=0.70; I <sup>2</sup> =0%                                          |                                                                |                                                                                                          |                                                                                                                                      |
|                           |                                      |                                |                                               |                                  | Rectal<br>8 Cohort                                                                                                                                                                                                                                                            | RR=0.94 (0.85; 1.04)                                                      | Quality not reported<br><br><b>Heterogeneity:</b><br>p=0.59; I <sup>2</sup> =0%                                          |                                                                |                                                                                                          |                                                                                                                                      |
|                           |                                      |                                | <b>Wu et al.,<br/>2013<br/>China<br/>[36]</b> | <b>Up to April<br/>2012</b>      | <b>Inclusions:</b> 1) used a case–control or prospective study design; 2) evaluated the association between CV intake and CRC risk; 3) presented odds ratio (OR), RR, or hazard ratio (HR) estimates with 95% CI, standard errors (SE), or data necessary to calculate these. | High intake<br>cruciferous<br>vegetable,<br>cabbage,<br>broccoli          | Low intake<br>cruciferous<br>vegetable,<br>cabbage,<br>broccoli                                                          | CRC Risk<br>10 Cohort;<br>23 case-<br>control<br><br>1,295,063 | Cruciferous<br><b>RR=0.82 (0.75; 0.90)</b><br><br>Cabbage<br><b>RR=0.76 (0.60; 0.97)</b><br><br>Broccoli | Quality: The range of<br>quality scores was<br>from 4 to 9 on NOS<br>(median=7)<br><br><b>Heterogeneity:</b><br>Cruciferous: p<0.01; |

| Study Country (Reference)              | Search period and databases searched | Inclusion / exclusion criteria                                                                                                                                                                                                                                                                                                                                                                                                                                                                  | Intervention                           | Control                               | Outcomes                                                                | Results                                                                                                 | Quality score Heterogeneity Publication bias                                                                                                          |
|----------------------------------------|--------------------------------------|-------------------------------------------------------------------------------------------------------------------------------------------------------------------------------------------------------------------------------------------------------------------------------------------------------------------------------------------------------------------------------------------------------------------------------------------------------------------------------------------------|----------------------------------------|---------------------------------------|-------------------------------------------------------------------------|---------------------------------------------------------------------------------------------------------|-------------------------------------------------------------------------------------------------------------------------------------------------------|
|                                        |                                      |                                                                                                                                                                                                                                                                                                                                                                                                                                                                                                 |                                        |                                       | subjects<br>24,275 cases                                                | RR=0.82 (0.65; 1.02)                                                                                    | I <sup>2</sup> =66%<br>Cabbage: p=0.23;<br>I <sup>2</sup> =58%<br>Broccoli: p=0.05;<br>I <sup>2</sup> =55%<br><br>No publication bias                 |
| <b>Woo et al., 2014 Korea</b> [40]     | Up to June 20 <sup>th</sup> , 2014   | <b>Inclusions:</b> (1) original articles with a case-control or Cohort design; (2) articles reporting on cancer risk and diet in the Korean population; (3) studies reporting adjusted OR or RR with 95% CI for the risk of cancer in subjects with the highest category of food intake compared with those with the lowest food intake; and (4) in cases of multiple publications drawn from studies of the same population, only the most recent study was included.                          | Highest level of vegetable consumption | Lowest level of vegetable consumption | CRC<br>2 studies                                                        | RR=0.51 (0.19; 1.32)                                                                                    | Quality<br>Not performed<br><br>Heterogeneity<br>p=0.024, I <sup>2</sup> =80.5%<br><br>Publication bias<br>Not performed                              |
| <b>Zhu et al., 2015</b> [39]           | <b>Up to December 2014</b>           | <b>Inclusions:</b> 1) Cohort; 2) the exposure was legume consumption, including tofu or soybeans, peas, beans, lentils, and other podded plants and all products made of them; 3) the outcome was risk of CRC, incidence of CRC; 4) provided or allowed calculation of RR with 95% CI<br><br><b>Exclusion:</b> 1) retrospective design; 2) were Non-human, in vitro research, case reports; 3) focused on the recurrence, growth; 4) focused on adenoma; and 5) did not adjust for confounders. | High intake legume                     | Low intake legume                     | CRC Risk<br><br>14 Cohort<br><br>1,903,459 participants<br>12,261 cases | <b>RR=0.91 (0.84; 0.98)</b><br><br>CRC men<br>RR=0.92 (0.85; 1.01)<br>CRC Women<br>RR=0.90 (0.78; 1.03) | Quality not reported<br><br><b>Heterogeneity:</b><br><b>p=0.01; I<sup>2</sup>=40.2%</b><br><br><b>Publication bias</b><br>Egger p=0.16<br>Begg p=0.31 |
| <b>Tsé et al., 2014 Australia</b> [37] | <b>Up to May 2013</b>                | <b>Inclusion</b> 1) original data was provided; 2) the association between cruciferous vegetable intake and colorectal neoplasm risk was addressed; 3) the risk point estimate was                                                                                                                                                                                                                                                                                                              | High intake total vegetable            | Low intake total vegetable            | CRC<br><br>11 Cohort;<br>18 case-                                       | OR=0.92 (0.83; 1.01)                                                                                    | Quality not reported<br><br><b>Heterogeneity:</b><br><b>p&lt;0.01; I<sup>2</sup>=66%</b>                                                              |

| Study Country (Reference)                 | Search period and databases searched | Inclusion / exclusion criteria                                                                                                                                                                                                                                                    | Intervention                  | Control            | Outcomes                          | Results                                                                                | Quality score<br>Heterogeneity<br>Publication bias                                                                                                                            |
|-------------------------------------------|--------------------------------------|-----------------------------------------------------------------------------------------------------------------------------------------------------------------------------------------------------------------------------------------------------------------------------------|-------------------------------|--------------------|-----------------------------------|----------------------------------------------------------------------------------------|-------------------------------------------------------------------------------------------------------------------------------------------------------------------------------|
|                                           |                                      | reported as an OR or RR, or the data was presented such that an OR could be calculated; and 4) the 95% CI was reported, or the data was presented such that the CI could be calculated.                                                                                           |                               |                    | control                           |                                                                                        | <b>Publication bias</b><br>Egger p=0.13                                                                                                                                       |
|                                           |                                      |                                                                                                                                                                                                                                                                                   |                               |                    | Colon                             | <b>OR=0.84 (0.72; 0.98)</b>                                                            | Quality not reported<br><b>Heterogeneity:</b><br><b>p&lt;0.01; I<sup>2</sup>=64%</b>                                                                                          |
|                                           |                                      |                                                                                                                                                                                                                                                                                   |                               |                    | Rectal                            | OR=0.99 (0.67; 1.46)                                                                   | Quality not reported<br><b>Heterogeneity:</b><br><b>p&lt;0.01; I<sup>2</sup>=87%</b>                                                                                          |
| <b>Kashino et al., 2015 Japan</b><br>[38] | <b>up to December 2014</b>           | <b>Inclusion:</b> 1) only studies on Japanese populations living in Japan, 2) presented colorectal cancer risk associated with intakes of total vegetable, green yellow vegetable or green vegetable<br><br><b>Exclusion:</b> 1) results only for intake of individual vegetable. | Highest vegetable consumption | Lowest consumption | CRC<br>6 Cohort, 11 case-control  | Cohort:<br>RR=1.00 (0.92; 1.10)<br><b>case-control:</b><br><b>RR=0.75 (0.59; 0.96)</b> | Quality not reported<br><br><b>Heterogeneity:</b><br>Cohort: p=0.52;<br>I <sup>2</sup> =0%<br>case-control: p=0.03;<br>I <sup>2</sup> =45%<br><br><b>No publication bias</b>  |
|                                           |                                      |                                                                                                                                                                                                                                                                                   |                               |                    | Colon<br>3 Cohort; 5 case-control | Cohort :<br>RR=0.95 (0.83; 1.09)<br>case-control :<br>RR=0.80(0.58; 1.11)              | Quality not reported<br><br><b>Heterogeneity:</b><br>Cohort: p=0.35;<br>I <sup>2</sup> =10%<br>case-control: p=0.18;<br>I <sup>2</sup> =36%<br><br><b>No publication bias</b> |
|                                           |                                      |                                                                                                                                                                                                                                                                                   |                               |                    | Rectal<br>4 Cohort                | case-control:<br>RR=1.08 (0.93; 1.26)                                                  | Quality not reported<br><br><b>Heterogeneity:</b><br>Cohort: p=0.52;<br>I <sup>2</sup> =10%<br>case-control: p=0.09;<br>I <sup>2</sup> =48%<br><br><b>No publication bias</b> |

| Study Country (Reference)        | Search period and databases searched | Inclusion / exclusion criteria                                                                                                                                                                                                                        | Intervention                                          | Control | Outcomes                           | Results                     | Quality score<br>Heterogeneity<br>Publication bias                                                                                                 |
|----------------------------------|--------------------------------------|-------------------------------------------------------------------------------------------------------------------------------------------------------------------------------------------------------------------------------------------------------|-------------------------------------------------------|---------|------------------------------------|-----------------------------|----------------------------------------------------------------------------------------------------------------------------------------------------|
| Vieira et al, 2017<br>UK<br>[27] | Up to May 2015                       | Inclusion: 1) RCT, Cohort or case-control design, 2) report adjusted estimates of the RR and 95% CIs for the association of foods and CRC incidence; 3) for dose-response meta-analysis, studies should provide a quantitative measure of the intake. | Vegetable<br>Dose response<br>Incremental of 100g/day |         | CRC Risk                           | <b>RR=0.98 (0.96; 0.99)</b> | High quality studies but not detailed<br><br><b>Heterogeneity:</b><br>p=0.48; I <sup>2</sup> =0%<br><br><b>Publication bias:</b><br>Egger p=0.92   |
|                                  |                                      |                                                                                                                                                                                                                                                       |                                                       |         | Colon<br>8 Cohort or case-control  | <b>RR=0.97 (0.95; 0.99)</b> | High quality studies but not detailed<br><br><b>Heterogeneity:</b><br>p=0.77; I <sup>2</sup> =0%<br><br><b>Publication bias:</b><br>Egger p=0.77   |
|                                  |                                      |                                                                                                                                                                                                                                                       |                                                       |         | Rectal<br>8 Cohort or case-control | RR=0.99 (0.96; 1.02)        | High quality studies but not detailed<br><br><b>Heterogeneity:</b><br>p=0.78; I <sup>2</sup> =0%<br><br><b>Publication bias:</b><br>Egger p=0.72   |
|                                  |                                      |                                                                                                                                                                                                                                                       | Fruits<br>Dose response<br>Incremental of 100g/day    |         | CRC<br>13 Cohort or case-control   | <b>RR=0.96 (0.93; 1.00)</b> | High quality studies but not detailed<br><br><b>Heterogeneity:</b><br>p<0.001; I <sup>2</sup> =68%<br><br><b>Publication bias:</b><br>Egger p=0.07 |
|                                  |                                      |                                                                                                                                                                                                                                                       |                                                       |         | Colon<br>12 Cohort or case-control | RR=0.98 (0.96; 1.01)        | High quality studies but not detailed<br><br><b>Heterogeneity:</b>                                                                                 |
|                                  |                                      |                                                                                                                                                                                                                                                       |                                                       |         |                                    |                             |                                                                                                                                                    |

| Study Country (Reference)                 | Search period and databases searched | Inclusion / exclusion criteria                                                                                                                                                                                                                                                                                                                              | Intervention                                          | Control | Outcomes                              | Results                     | Quality score<br>Heterogeneity<br>Publication bias                                                                                                                                            |
|-------------------------------------------|--------------------------------------|-------------------------------------------------------------------------------------------------------------------------------------------------------------------------------------------------------------------------------------------------------------------------------------------------------------------------------------------------------------|-------------------------------------------------------|---------|---------------------------------------|-----------------------------|-----------------------------------------------------------------------------------------------------------------------------------------------------------------------------------------------|
|                                           |                                      |                                                                                                                                                                                                                                                                                                                                                             |                                                       |         |                                       |                             | P=0.09; I <sup>2</sup> =38%                                                                                                                                                                   |
|                                           |                                      |                                                                                                                                                                                                                                                                                                                                                             |                                                       |         | Rectal<br>9 Cohort or<br>case-control | RR=0.98 (0.93; 1.03)        | <b>Publication bias:</b><br>Egger p=0.55<br>High quality studies<br>but not detailed<br><b>Heterogeneity:</b><br><b>P=0.02; I<sup>2</sup>=55%</b><br><b>Publication bias:</b><br>Egger p=0.41 |
|                                           |                                      |                                                                                                                                                                                                                                                                                                                                                             | Legumes<br>Dose response<br>Incremental of<br>50g/day |         | CRC<br>4 Cohort or<br>case-control    | RR=1.00 (0.95; 1.06)        | High quality studies<br>but not detailed<br><b>Heterogeneity:</b><br>P=0.20; I <sup>2</sup> =33%<br><b>None detected</b>                                                                      |
|                                           |                                      |                                                                                                                                                                                                                                                                                                                                                             |                                                       |         | Colon<br>6 Cohort or<br>case-control  | RR=0.97 (0.83; 1.15)        | <b>Heterogeneity:</b><br>P=0.04; I <sup>2</sup> =55%                                                                                                                                          |
|                                           |                                      |                                                                                                                                                                                                                                                                                                                                                             |                                                       |         | Rectal<br>4 Cohort or<br>case-control | RR=0.99 (0.78; 1.25)        | <b>Heterogeneity:</b><br>P=0.14; I <sup>2</sup> =45%                                                                                                                                          |
| <b>SOY</b>                                |                                      |                                                                                                                                                                                                                                                                                                                                                             |                                                       |         |                                       |                             |                                                                                                                                                                                               |
| Tsé et al.,<br>2016,<br>Australia<br>[41] | Throught May<br>2014                 | (1) original data on soy consumption and GI neoplasms risk, that of the esophagus, stomach and/or colorectum, were provided; (2) the risk point estimate was reported as OR or RR, or the data were presented such that an OR could be calculated; (3) the 95 % confidence interval (CI) was reported, or the data were presented such that the CI could be | Soy intake                                            |         | CRC risk                              | <b>OR=0.92 (0.87; 0.97)</b> | Quality<br>Not reported<br><br>Heterogeneity<br>p=0.3<br><br>Publication bias<br>Egger's p<0.001                                                                                              |

| Study Country (Reference)     | Search period and databases searched | Inclusion / exclusion criteria                                                                                                                                                                                                                                                                                                                                                                                                                                                                                                            | Intervention                 | Control                     | Outcomes              | Results                                  | Quality score<br>Heterogeneity<br>Publication bias                                                                                       |
|-------------------------------|--------------------------------------|-------------------------------------------------------------------------------------------------------------------------------------------------------------------------------------------------------------------------------------------------------------------------------------------------------------------------------------------------------------------------------------------------------------------------------------------------------------------------------------------------------------------------------------------|------------------------------|-----------------------------|-----------------------|------------------------------------------|------------------------------------------------------------------------------------------------------------------------------------------|
|                               |                                      | calculated.                                                                                                                                                                                                                                                                                                                                                                                                                                                                                                                               |                              |                             | Colon cancer          | <b>OR=0.92(0.96;0.99)</b>                | Quality<br>Not reported<br><br>Heterogeneity<br>p=0.163<br><br>Publication bias<br>Egger's p<0.001                                       |
|                               |                                      |                                                                                                                                                                                                                                                                                                                                                                                                                                                                                                                                           |                              |                             | Rectal cancer         | OR= 0.94 (0.80;1.09)                     | Quality<br>Not reported<br><br>Heterogeneity<br>Not reported<br><br>Publication bias<br>Egger's p<0.001                                  |
| Zhu et al, 2015<br>China [39] | Up to December 2014                  | <b>Inclusions</b> 1) a prospective Cohort design; 2) the exposure was legume consumption, including tofu or soybeans, peas, beans, lentils, and other podded plants and all products made of them; 3) the outcome was risk of CRC, incidence of colorectal cancer; 4) provided or allowed calculation of RR with 95% CI<br><br><b>Exclusions:</b> 1) had a retrospective design; 2) were Non- human, in vitro research, case reports; 3) focused on the recurrence, growth; 4) focused on adenoma; and 5) did not adjust for confounders. | Highest soybeans consumption | Lowest soybeans consumption | CRC risk<br>3 studies | Soybean<br><b>RR = 0.85 (0.73; 0.99)</b> | Quality<br>Not reported<br><br>Heterogeneity<br>I <sup>2</sup> =40.2%, p=0.01<br><br>Publication bias<br>Egger's p=0.16<br>Begg's p=0.31 |
| Woo et al, 2014<br>Korea [40] | Up to June 20 <sup>th</sup> , 2014   | <b>Inclusions:</b> (1) original articles with a case-control or Cohort design; (2) articles reporting on cancer risk and diet in the Korean population; (3) studies reporting adjusted OR or RR with 95% CI for the risk of cancer in subjects with the highest                                                                                                                                                                                                                                                                           | Highest level of intake      | Lowest level of intake      | CRC risk              | Soybean:<br>OR=1.01 (0.70;1.47)          | Quality performed<br>Not reported<br><br>Heterogeneity<br>I <sup>2</sup> =17.6%, p=0.297                                                 |

| Study Country (Reference) | Search period and databases searched | Inclusion / exclusion criteria                                                                                                                                                                         | Intervention | Control | Outcomes | Results | Quality score<br>Heterogeneity<br>Publication bias |
|---------------------------|--------------------------------------|--------------------------------------------------------------------------------------------------------------------------------------------------------------------------------------------------------|--------------|---------|----------|---------|----------------------------------------------------|
|                           |                                      | category of food intake compared with those with the lowest food intake; and (4) in cases of multiple publications drawn from studies of the same population, only the most recent study was included. |              |         |          |         | Publication bias: not reported                     |

aRR: adjusted risk ratio, Ca: calcium, case-control: case-control study, CI: confidence interval, Cohort: cohort study, CRA: colorectal adenoma, CRC: colorectal cancer, FU: follow-up, GI: gastro-intestinal, HR: hazard ratio, Mg: magnesium, NS: not specified, NSAID: non-steroidal anti-inflammatory drugs, NOS: Newcastle-Ottawa Scale, OR: odds ratio, RCT: randomised clinical trial, RR: risk ratio, unk: unknown, Vit: vitamin;

A: includes also the comparisons of Vit E + b-Carotene vs placebo; Vit A + b-Carotene vs placebo; Vit E + selenium alone vs placebo; Vit CE + b-Carotene ( $\pm$  simvastatin) vs Placebo ( $\pm$  simvastatin); Vit CE + b-Carotene + selenium + zinc vs placebo. All were had not significant risk ratios

\* See calcium section

\*\* not primary outcome

**Supplementary Table 2. Components with no protective effect on CRC prevention**

| Study Country (Reference)            | Search period and databases searched            | Inclusion / exclusion criteria                                                                                                                                                                                                                                                                                                                                                                   | Intervention                           | Control                    | Outcomes                                    | Results                               | Quality score<br>Heterogeneity<br>Publication bias                                                               |
|--------------------------------------|-------------------------------------------------|--------------------------------------------------------------------------------------------------------------------------------------------------------------------------------------------------------------------------------------------------------------------------------------------------------------------------------------------------------------------------------------------------|----------------------------------------|----------------------------|---------------------------------------------|---------------------------------------|------------------------------------------------------------------------------------------------------------------|
| <b>Vitamine E</b>                    |                                                 |                                                                                                                                                                                                                                                                                                                                                                                                  |                                        |                            |                                             |                                       |                                                                                                                  |
| Pais et al., 2013<br>Romania<br>[46] | Up to May 2009<br><br>Cochrane Library, Medline | <b>Inclusions:</b> 1) RCT, 2) antioxidants alone or in combination versus placebo or no intervention, 3) reported the incidence of colorectal cancer as primary or secondary outcome 4) global or cancer related mortality 5) participants had to be free of history of cancer (except skin cancer), 6) $\geq$ age 18 years, 2) general populations or from other patients groups primarily with | Vit A, C and E, selenium or b-carotene | placebo or no intervention | CRC incidence<br><br>12 RCT<br><br>N=17,914 | Vit E alone:<br>RR =0.99 (0.86; 1.13) | Quality not reported<br><br>Heterogeneity:<br>Overall: $I^2 = 7\%$ ,<br>$p=0.38$<br><br>Publication bias:<br>low |



| Study Country (Reference)                    | Search period and databases searched                                                                                                              | Inclusion / exclusion criteria                                                                                                                                                                                                                                                                                                                                                                                                                                  | Intervention                           | Control                 | Outcomes                               | Results                                 | Quality score Heterogeneity Publication bias                                                                                                                                                              |
|----------------------------------------------|---------------------------------------------------------------------------------------------------------------------------------------------------|-----------------------------------------------------------------------------------------------------------------------------------------------------------------------------------------------------------------------------------------------------------------------------------------------------------------------------------------------------------------------------------------------------------------------------------------------------------------|----------------------------------------|-------------------------|----------------------------------------|-----------------------------------------|-----------------------------------------------------------------------------------------------------------------------------------------------------------------------------------------------------------|
|                                              |                                                                                                                                                   | non-gastrointestinal diseases.<br><br><b>Exclusions:</b> 1) antioxidants supplementation through dietary increases in fruits, vegetables or fibers.                                                                                                                                                                                                                                                                                                             |                                        |                         |                                        |                                         |                                                                                                                                                                                                           |
| Bjelakovic et al., 2008 Denmark [43]         | 1945-2007<br><br>CENTRAL, MEDLINE, EMBASE, LILACS, SCI-EXPANDED                                                                                   | <b>Inclusions:</b> 1) randomised trials, irrespective of blinding, publication status, publication year, or language, 2) adults, 3) antioxidant supplements at any dose, duration, and route of administration 4) compared to placebo or no intervention.                                                                                                                                                                                                       | Vit A, C and E, selenium or b-carotene | placebo/no intervention | CRC incidence*<br><br>2RCT<br>N=21,114 | Vit E alone:<br>RR = 1.10 (0.87; 1.39); | Quality performed with a published scale<br><br>Heterogeneity: Tau2 = 0.0; Chi2 = 0.57, df = 1 (P = 0.45); I2 = 0.0%<br>Test for overall effect: Z = 0.80 (P = 0.42)<br><br>Publication bias: unk for CRC |
| Papaioannou et al, 2011 UK <sup>A</sup> [45] | Up to March 2009<br><br>Cochrane Library, MEDLINE, PreMEDLINE, CINAHL, EMBASE, Web of Science, BIOSIS and Research Registers UKCRN, MRC Register, | <b>Inclusions:</b> 1) RCT, 2) antioxidants (vitamin A, C and E, selenium or b-carotene) with or without other agents, 3) adults, 4) general population 5) compared to no intervention, placebo or agents other than antioxidants,<br><br><b>Exclusions:</b> none of the inclusions<br><br><b>Population:</b> healthy populations and in populations with histories of cardiovascular disease; smoking or asbestos exposure; skin cancer; and atrophic gastritis | Vit E alone (studies with event data)  | Placebo alone           | CRC incidence<br>2 RCTs<br>N=32,006    | RR=1.05 (0.83; 1.33)                    | Quality performed with a published scale<br><br>Heterogeneity: Overall: I <sup>2</sup> = 0%,<br><br>Publication bias: unk for CRC                                                                         |

| Study Country (Reference)       | Search period and databases searched                   | Inclusion / exclusion criteria                                                                                                                                                                                                                                                                                                                                                                                                                                                                       | Intervention                                                                | Control                 | Outcomes                                              | Results                          | Quality score Heterogeneity Publication bias                                                                                      |
|---------------------------------|--------------------------------------------------------|------------------------------------------------------------------------------------------------------------------------------------------------------------------------------------------------------------------------------------------------------------------------------------------------------------------------------------------------------------------------------------------------------------------------------------------------------------------------------------------------------|-----------------------------------------------------------------------------|-------------------------|-------------------------------------------------------|----------------------------------|-----------------------------------------------------------------------------------------------------------------------------------|
|                                 | Current controlled trials                              |                                                                                                                                                                                                                                                                                                                                                                                                                                                                                                      |                                                                             |                         |                                                       |                                  |                                                                                                                                   |
|                                 |                                                        |                                                                                                                                                                                                                                                                                                                                                                                                                                                                                                      | Vit E (adjusted for other antioxidants; studies with or without event data) | Placebo alone           | CRC incidence<br>6 RCTs<br>N=not reported             | RR=0.99 (0.86;1.14)              | Quality performed with a published scale<br><br>Heterogeneity: Overall: I <sup>2</sup> = 0%,<br><br>Publication bias: unk for CRC |
| Liu et al., 2015<br>China [23]  | Up to April 2014<br><br>Pubmed                         | Inclusions: [1] they were cohort studies [2]; the exposure of interest was vitamin or multiple-vitamin supplement intake [3]; the outcome of interest was the incidence of colorectal, colon, or rectal cancer [4]; relative risk (RR) or odds ratio (OR) estimates with 95 % confidence intervals (95 % CI) were reported;<br><br>Exclusions: Articles with <6 stars were excluded.                                                                                                                 | highest level vitamin                                                       | Lowest level of vitamin | CRC incidence<br><br>13 COHORT for Vit E<br><br>N=unk | Vit E:<br>RR = 0.94 (0.82; 1.32) | Quality performed: NOS<br><br>Heterogeneity: Vit E: I <sup>2</sup> = 10%;<br><br>Publication bias: Vit E: p=0.02                  |
| Heine-Bröring et al., 2015 [22] | Up to January 2013<br><br>Medline, Embase and Cochrane | Inclusions: prospective cohort studies if they reported original and peer-reviewed data on the association of dietary supplement use and colorectal, colon, or rectal cancer incidence. To be included in the meta-analyses, information on ascertainment of colorectal cancer cases, and estimates of the relative risk with 95% confidence intervals (95% CI) were required<br><br>Exclusions: studies on colorectal adenomas were excluded, Randomized controlled trials and case-control studies | Intake of multivitamins, Vit A, Vit C, Vit E, Vit D, Calcium* and Garlic.   | No intake               | Colon cancer incidence<br>5 COHORT for Vit E          | Vit E<br>RR = 0.85 (0.72; 1.01)  | Quality performed: none<br><br>Heterogeneity: Vit E I <sup>2</sup> =20%; p=0.29<br><br>Publication bias: not reported             |

| Study Country (Reference)                | Search period and databases searched                                                                                     | Inclusion / exclusion criteria                                                                                                                                                                                                              | Intervention                                                               | Control                                                                   | Outcomes                                                                   | Results                                 | Quality score Heterogeneity Publication bias                                                                              |
|------------------------------------------|--------------------------------------------------------------------------------------------------------------------------|---------------------------------------------------------------------------------------------------------------------------------------------------------------------------------------------------------------------------------------------|----------------------------------------------------------------------------|---------------------------------------------------------------------------|----------------------------------------------------------------------------|-----------------------------------------|---------------------------------------------------------------------------------------------------------------------------|
|                                          |                                                                                                                          | were excluded                                                                                                                                                                                                                               |                                                                            |                                                                           |                                                                            |                                         |                                                                                                                           |
|                                          |                                                                                                                          |                                                                                                                                                                                                                                             | Highest level of multivitamins, Vit A, Vit C, Vit E, Vit D, Ca and Garlic. | Lowest level of multivitamins, Vit A, Vit C, Vit E, Vit D, Ca and Garlic. | Colon cancer incidence<br>5 COHORT for Vit E,                              | Vit E:<br><b>RR = 0.82 (0.67; 0.99)</b> | Quality performed: none<br><br>Heterogeneity: Vit E<br>$I^2=11\%$ ; $p=0.34$<br><br>Publication bias: not reported        |
| Alkhenizan et al. 2007 Saudi Arabia [42] | January 1966- June 2005<br><br>Medline, Embase and Cochrane                                                              | Inclusions: 1) RCTs, 2) outcomes related to cancer prevention 3) intake of vit E supplements alone or with other supplements 3) >18 years old 4) supplementation was in capsule or tablet form, to be consumed by mouth.<br><br>Exclusions: | Intake of vitamin E supplement alone or with other supplements             | placebo or control                                                        | CRC incidence<br>2 RCTs with vit E alone<br><br>N= 24,114 (vit E alone)    | Vit E Alone:<br>RR=1.05 (0.79; 1.39)    | Quality performed: Jadad score<br><br>Heterogeneity: Not reported for CRC incidence<br><br>Publication bias: not reported |
| Arain et al., 2010 UK [44]               | January 1999- January 2009<br><br>Medline, Embase and Cochrane, OVID data base and other library sources, Google scholar | Inclusions: 1) RCTs<br><br>Exclusions: 1) combination of vitamins or antioxidant effect 2) outcome of changes at cellular level 3) dichotomous outcome of colorectal cancer                                                                 | Intake of vit E                                                            | placebo or other supplement                                               | CRC incidence<br>4 RCTs (2 studies 300UI/day, one 400UI/day, one 50mg/day) | Vit E<br>RR= 0.89 (0.76; 1.05)          | Quality performed: CONSORT scoring<br><br>Heterogeneity: $I^2=7\%$ ; $p=0.36$<br><br>Publication bias: not reported       |
| <b>Vitamin C</b>                         |                                                                                                                          |                                                                                                                                                                                                                                             |                                                                            |                                                                           |                                                                            |                                         |                                                                                                                           |
| Heine-                                   | Up to January                                                                                                            | Inclusions: prospective cohort studies if                                                                                                                                                                                                   | Intake of                                                                  | No intake                                                                 | Colon                                                                      | Vit C                                   | Quality                                                                                                                   |

| Study Country (Reference)                    | Search period and databases searched                                                                               | Inclusion / exclusion criteria                                                                                                                                                                                                                                                                                                                                                                                                                                           | Intervention                                                               | Control                                                                   | Outcomes                                             | Results                          | Quality score Heterogeneity Publication bias                                                                                      |
|----------------------------------------------|--------------------------------------------------------------------------------------------------------------------|--------------------------------------------------------------------------------------------------------------------------------------------------------------------------------------------------------------------------------------------------------------------------------------------------------------------------------------------------------------------------------------------------------------------------------------------------------------------------|----------------------------------------------------------------------------|---------------------------------------------------------------------------|------------------------------------------------------|----------------------------------|-----------------------------------------------------------------------------------------------------------------------------------|
| Bröring et al., 2015 [22]                    | 2013<br><br>Medline, Embase and Cochrane                                                                           | they reported original and peer-reviewed data on the association of dietary supplement use and colorectal, colon, or rectal cancer incidence. To be included in the meta-analyses, information on ascertainment of colorectal cancer cases, and estimates of the relative risk with 95% confidence intervals (95% CI) were required<br><br>Exclusions: studies on colorectal adenomas were excluded, Randomized controlled trials and case-control studies were excluded | multivitamins, Vit A, Vit C, Vit E, Vit D, Calcium* and Garlic.            |                                                                           | cancer incidence<br>3 COHORT for Vit C               | RR = 0.87 (0.63; 1.21),          | performed: none<br><br>Heterogeneity: Vit C<br>I <sup>2</sup> =77%; p=0.01<br><br>Publication bias: not reported                  |
|                                              |                                                                                                                    |                                                                                                                                                                                                                                                                                                                                                                                                                                                                          | Highest level of multivitamins, Vit A, Vit C, Vit E, Vit D, Ca and Garlic. | Lowest level of multivitamins, Vit A, Vit C, Vit E, Vit D, Ca and Garlic. | <b>Colon cancer incidence</b><br>3 COHORT for Vit C, | Vit C:<br>RR = 0.85 (0.68; 1.05) | Quality performed: none<br><br>Heterogeneity: Vit C<br>I <sup>2</sup> =11%; p=0.33<br><br>Publication bias: not reported          |
| Papaioannou et al, 2011 UK <sup>A</sup> [45] | Up to March 2009<br><br>Cochrane Library, MEDLINE, PreMEDLINE, CINAHL, EMBASE, Web of Science, BIOSIS and Research | <b>Inclusions:</b> 1) RCT, 2) antioxidants (vitamin A, C and E, selenium or b-carotene) with or without other agents, 3) adults, 4) general population 5) compared to no intervention, placebo or agents other than antioxidants,<br><br><b>Exclusions:</b> none of the inclusions<br><br><b>Population:</b> healthy populations and in populations with histories of cardiovascular disease; smoking or asbestos exposure; skin cancer; and                             | Vit C (adjusted for other antioxidants; studies with no event data)        | No Vit C (adjusted for other antioxidants)                                | <b>CRC incidence</b><br>2 RCTs<br>N=not reported     | RR= 0.84 (0.64;1.10)             | Quality performed with a published scale<br><br>Heterogeneity: Overall: I <sup>2</sup> = 0%,<br><br>Publication bias: unk for CRC |

| Study Country (Reference)                                                     | Search period and databases searched                     | Inclusion / exclusion criteria                                                                                                                                                                                                                                                                                                                                                                                                                                                                                     | Intervention                           | Control                    | Outcomes                                                | Results                                                                                                                                                                    | Quality score Heterogeneity Publication bias                                                                                  |
|-------------------------------------------------------------------------------|----------------------------------------------------------|--------------------------------------------------------------------------------------------------------------------------------------------------------------------------------------------------------------------------------------------------------------------------------------------------------------------------------------------------------------------------------------------------------------------------------------------------------------------------------------------------------------------|----------------------------------------|----------------------------|---------------------------------------------------------|----------------------------------------------------------------------------------------------------------------------------------------------------------------------------|-------------------------------------------------------------------------------------------------------------------------------|
|                                                                               | Registers UKCRN, MRC Register, Current controlled trials | atrophic gastritis                                                                                                                                                                                                                                                                                                                                                                                                                                                                                                 |                                        |                            |                                                         |                                                                                                                                                                            |                                                                                                                               |
| <b>Antioxidants combination or vitamins combination with other components</b> |                                                          |                                                                                                                                                                                                                                                                                                                                                                                                                                                                                                                    |                                        |                            |                                                         |                                                                                                                                                                            |                                                                                                                               |
| Heine-Bröring et al., 2015 [22]                                               | Up to January 2013<br><br>Medline, Embase and Cochrane   | <b>Inclusions:</b> prospective Cohort studies if they reported original and peer-reviewed data on the association of dietary supplement use and colorectal, colon, or rectal cancer incidence. To be included in the meta-analyses, information on ascertainment of CRC cases, and estimates of the RR with 95% CI were required<br><br><b>Exclusions:</b> studies on colorectal adenomas, RCTs and case-control                                                                                                   | Intake of multivitamins                | No intake                  | <b>CRC incidence</b><br><br>16 Cohort for multivitamins | Multivitamins:<br><b>RR=0.92(0.86;0.98)</b>                                                                                                                                | Quality performed: none<br><br>Heterogeneity: Multivitamins: I <sup>2</sup> =0%; p=0.43<br><br>Publication bias: not reported |
| Pais et al., 2013 Romania [46]                                                | Up to May 2009<br><br>Cochrane Library, Medline          | <b>Inclusions:</b> 1) RCT, 2) antioxidants alone or in combination versus placebo or no intervention, 3) reported the incidence of CRC as primary or secondary outcome 4) global or cancer related mortality 5) participants had to be free of history of cancer (except skin cancer), 6) ≥age 18 years, 2) general populations or from other patients groups primarily with non-GI diseases.<br><br><b>Exclusions:</b> 1) antioxidants supplementation through dietary increases in fruits, vegetables or fibers. | Vit A, C and E, selenium or β-carotene | placebo or no intervention | CRC incidence<br><br>4 RCT<br><br>N=52,262              | Overall antioxidant combination:<br><b>RR=0.98 (0.89;1.07)</b><br><br>Vit C combination<br><b>RR=0.83(0.69;1.00)</b><br><br>Vit E combination<br><b>RR=0.97(0.85;1.10)</b> | Quality not reported<br><br>Heterogeneity: Overall: I <sup>2</sup> = 7%, p=0.38<br><br>Publication bias: low                  |
| Bjelakovic et al., 2008 Denmark                                               | 1945-2007<br><br>Central,                                | <b>Inclusions:</b> 1) RCT, irrespective of blinding, publication status, publication year, or language, 2) adults, 3)                                                                                                                                                                                                                                                                                                                                                                                              | antioxidant supplements (Vit A, C and  | placebo/no intervention    | CRC incidence*                                          | Overall:<br><b>RR=0.97(0.86; 1.09)</b>                                                                                                                                     | Quality performed with a published scale                                                                                      |

| Study Country (Reference)                    | Search period and databases searched                                                                                                                                        | Inclusion / exclusion criteria                                                                                                                                                                                                                                                                                                                                                                                                                      | Intervention                                                                                    | Control                                             | Outcomes                                                                                                     | Results                                                                   | Quality score Heterogeneity Publication bias                                                                                          |
|----------------------------------------------|-----------------------------------------------------------------------------------------------------------------------------------------------------------------------------|-----------------------------------------------------------------------------------------------------------------------------------------------------------------------------------------------------------------------------------------------------------------------------------------------------------------------------------------------------------------------------------------------------------------------------------------------------|-------------------------------------------------------------------------------------------------|-----------------------------------------------------|--------------------------------------------------------------------------------------------------------------|---------------------------------------------------------------------------|---------------------------------------------------------------------------------------------------------------------------------------|
| [43]                                         | Medline, Embase, Lilacs, Sci-Expanded                                                                                                                                       | antioxidant supplements at any dose, duration, and route of administration 4) compared to placebo or no intervention.                                                                                                                                                                                                                                                                                                                               | E, selenium or $\beta$ -carotene)                                                               |                                                     | 20 RCT<br>N=211,818 for all GI cancer outcomes (unk for CRC)                                                 |                                                                           | Heterogeneity:<br>$I^2 = 20\%$ ,<br><br>Publication bias:<br>unk for CRC                                                              |
| Papaioannou et al, 2011 UK <sup>A</sup> [45] | Up to March 2009<br><br>Cochrane Library, MEDLINE, PreMEDLINE, CINAHL, EMBASE, Web of Science, BIOSIS and Research Registers UKCRN, MRC Register, Current controlled trials | <b>Inclusions:</b> 1) RCT, 2) antioxidants (vitamin A, C and E, selenium or $\beta$ -carotene) with or without other agents, 3) adults, 4) general population 5) compared to no intervention, placebo or agents other than antioxidants,<br><br><b>Exclusions:</b> none of the inclusions<br><br><b>Population:</b> healthy populations and in populations with histories of CVD; smoking or asbestos exposure; skin cancer; and atrophic gastritis | Antioxidants (Vit A, C and E, selenium or $\beta$ -carotene) +/- aspirin, simvastatin, ramipril | No antioxidants +/- aspirin, simvastatine, ramipril | CRC incidence<br><br>9 RCT<br><br>n=148,922                                                                  | RR=1.00(0.88; 1.13)<br>Random effect model                                | Quality performed with a published scale<br><br>Heterogeneity:<br>$I^2 = 25\%$ , p=0.22<br><br>Publication bias:<br>none              |
| Alkhenizan et al. 2007 Saudi Arabia [42]     | January 1966- June 2005<br><br>Medline, Embase and Cochrane                                                                                                                 | <b>Inclusions:</b> 1) RCTs, 2) outcomes related to cancer prevention 3) intake of Vit E supplements alone or with other supplements 3) >18 years old 4) supplementation was in capsule or tablet form, to be consumed by mouth.                                                                                                                                                                                                                     | Intake of vitamin E supplement alone or with other supplements                                  | placebo or control                                  | <b>CRC incidence</b><br>4 RCTs (2 RCTs with vit E alone)<br><br>N= 91,099 (all studies) 24,114 (vit E alone) | Vit E with other supplements:<br>RR=0.95(0.81;1.12)<br>Fixed effect model | Quality performed: Jadad score: high<br><br>Heterogeneity:<br>Not reported for CRC incidence<br><br>Publication bias:<br>not reported |

| Study Country (Reference)                | Search period and databases searched | Inclusion / exclusion criteria                                                                                                                                                                                                                                                                                                                                                   | Intervention                          | Control | Outcomes                                                                                                                                                               | Results                                                                                                                                                                                                                                | Quality score Heterogeneity Publication bias                                                                                                                                              |
|------------------------------------------|--------------------------------------|----------------------------------------------------------------------------------------------------------------------------------------------------------------------------------------------------------------------------------------------------------------------------------------------------------------------------------------------------------------------------------|---------------------------------------|---------|------------------------------------------------------------------------------------------------------------------------------------------------------------------------|----------------------------------------------------------------------------------------------------------------------------------------------------------------------------------------------------------------------------------------|-------------------------------------------------------------------------------------------------------------------------------------------------------------------------------------------|
| <b>β Carotene</b>                        |                                      |                                                                                                                                                                                                                                                                                                                                                                                  |                                       |         |                                                                                                                                                                        |                                                                                                                                                                                                                                        |                                                                                                                                                                                           |
| Druesne-Pecollo et al., 2010 France [47] | up to April 2009<br><br>Pubmed       | <b>Inclusions:</b> 1) RCTs, 2) original article 3) intervention consisting in β-carotene supplementation (given alone or in combination with other antioxidants), 4) primary cancer as outcome, 5) reporting the RR and 95% CIs of cancers at the end of the intervention (excepted for the Women's Health Study, which provided data 2 years after the end of the intervention) | β-carotene alone                      | Placebo | CRC incidence<br>3 RCTs<br><br>N=91,080                                                                                                                                | β-carotene alone:<br>RR=0.99(0.83; 1.18)                                                                                                                                                                                               | Quality performed: not done<br><br>Heterogeneity: I <sup>2</sup> =94%<br><br>Publication bias: not reported                                                                               |
|                                          |                                      |                                                                                                                                                                                                                                                                                                                                                                                  | β-carotene (alone and in combination) | Placebo | <b>CRC incidence</b><br>4 RCTs for overall<br>3 RCTs for alone<br>5 RCTs for combination<br><br>N=151,118 for overall,<br>91,080 for alone,<br>89,171 for combination, | Overall:<br>RR=0.96(0.85-1.09)<br><br>β-carotene in combination:<br>RR=0.94(0.79; 1.11)<br><br>Subgroup:<br>20-30mg/day :<br>RR=0.96(0.84;1.09),<br>Majority of Men<br>RR=0.99(0.93; 1.05)<br>Majority of Women<br>RR=0.99(0.93; 1.06) | Quality performed: not done<br><br>Heterogeneity:<br>Overall: I <sup>2</sup> =93%<br>Alone: I <sup>2</sup> =94%<br>Combined:<br>I <sup>2</sup> =70%<br><br>Publication bias: not reported |

| Study Country (Reference)                   | Search period and databases searched                            | Inclusion / exclusion criteria                                                                                                                                                                                                                                                                                                                                                                                                                                                                                                            | Intervention                                 | Control                    | Outcomes                                    | Results                                               | Quality score Heterogeneity Publication bias                                                                                                                               |
|---------------------------------------------|-----------------------------------------------------------------|-------------------------------------------------------------------------------------------------------------------------------------------------------------------------------------------------------------------------------------------------------------------------------------------------------------------------------------------------------------------------------------------------------------------------------------------------------------------------------------------------------------------------------------------|----------------------------------------------|----------------------------|---------------------------------------------|-------------------------------------------------------|----------------------------------------------------------------------------------------------------------------------------------------------------------------------------|
| Pais et al., 2013 Romania <sup>B</sup> [46] | Up to May 2009<br><br>Cochrane Library, Medline                 | <p><b>Inclusions:</b> 1) RCT, 2) antioxidants alone or in combination versus placebo or no intervention, 3) reported the incidence of CRC as primary or secondary outcome 4) global or cancer related mortality 5) participants had to be free of history of cancer (except skin cancer), 6) <math>\geq</math>age 18 years, 2) general populations or from other patients groups primarily with non-GI diseases.</p> <p><b>Exclusions:</b> 1) antioxidants supplementation through dietary increases in fruits, vegetables or fibers.</p> | $\beta$ -carotene alone<br>Dose 6–50 mg/day  | placebo or no intervention | CRC incidence<br><br>4 RCTs<br><br>N=16,913 | $\beta$ -carotene alone:<br>RR=1.09(0.92; 1.29)       | Quality not reported<br><br>Heterogeneity:<br>Unk for $\beta$ -carotene<br><br>Publication bias:<br>Unk for $\beta$ -carotene                                              |
|                                             |                                                                 |                                                                                                                                                                                                                                                                                                                                                                                                                                                                                                                                           | $\beta$ -carotene (alone and in combination) | placebo or no intervention | CRC incidence<br><br>4 RCTs<br><br>N=16,913 | $\beta$ -carotene combination:<br>RR=0.99(0.89; 1.11) | Quality not reported<br><br>Heterogeneity:<br>Unk for beta carotene<br><br>Publication bias:<br>Unk for beta carotene                                                      |
| Bjelakovic et al., 2008 Denmark [43]        | 1945-2007<br><br>Central, Medline, Embase, LILACS, sci-expanded | <p><b>Inclusions:</b> 1) RCT, irrespective of blinding, publication status, publication year, or language, 2) adults, 3) antioxidant supplements at any dose, duration, and route of administration 4) compared to placebo or no intervention.</p>                                                                                                                                                                                                                                                                                        | $\beta$ -carotene alone                      | placebo/no intervention    | CRC incidence*<br><br>3 RCT<br>n=36,782     | $\beta$ -carotene alone:<br>RR=1.09(0.79;1.51);       | Quality performed with a published scale<br><br>Heterogeneity:<br>(P = 0.12); I <sup>2</sup> =53%<br>Test for overall effect: Z = 0.51 (P = 0.61)<br><br>Publication bias: |



| Study Country (Reference)         | Search period and databases searched         | Inclusion / exclusion criteria                                                                                                                                                                                  | Intervention                                           | Control                 | Outcomes                                                                                                           | Results                                                                                                                                                                                                              | Quality score Heterogeneity Publication bias                                                                                                                                                                                                                                                                                                                                                                                                                      |
|-----------------------------------|----------------------------------------------|-----------------------------------------------------------------------------------------------------------------------------------------------------------------------------------------------------------------|--------------------------------------------------------|-------------------------|--------------------------------------------------------------------------------------------------------------------|----------------------------------------------------------------------------------------------------------------------------------------------------------------------------------------------------------------------|-------------------------------------------------------------------------------------------------------------------------------------------------------------------------------------------------------------------------------------------------------------------------------------------------------------------------------------------------------------------------------------------------------------------------------------------------------------------|
|                                   |                                              |                                                                                                                                                                                                                 | β-carotene (alone and in combination)                  | placebo/no intervention | CRC incidence*<br><br>20 RCT<br>N=211,818<br>for all GI cancer outcomes (unk for CRC)<br><br>One MA for each group | β-carotene and Vit A: RR=0.97(0.76;1.25);<br><br>β-carotene and Vit E RR=1.20(0.89;1.63);<br><br>β-carotene, vit C, and vit E: RR=0.84(0.65;1.07);<br><br>β-carotene, Vit C, Vit E, and selenium RR=0.88(0.49; 1.58) | unk for CRC<br><br>Quality performed with a published scale<br><br>Heterogeneity non-applicable.<br><br>β-carotene and vit A:<br>Test for overall effect: Z = 0.20 (P = 0.84)<br>β-carotene and Vit E<br>Test for overall effect: Z = 1.18 (P = 0.24)<br>β-carotene, vit C, and vit E:<br>Test for overall effect: Z = 1.44 (P = 0.15)<br>β-carotene, vit C, vit E, and selenium<br>Test for overall effect: Z = 0.42 (P = 0.67)<br>Publication bias: unk for CRC |
| Asano et al., 2004<br>Canada [48] | up to September 2003<br>Medline, preMedline, | <b>Inclusion:</b> RCTs that compared a NSAID intervention to a placebo or an alternate intervention for the prevention of CRAs or CRC were included, provided the trials reported at least one of the following | Aspirin 325 mg and/or β-carotene 50 mg every other day | placebo                 | CRC incidence<br>1 RCT <sup>†</sup>                                                                                | RR=1.15 (0.80; 1.64)                                                                                                                                                                                                 | Not specified                                                                                                                                                                                                                                                                                                                                                                                                                                                     |

| Study Country (Reference)       | Search period and databases searched                                                                                                                                        | Inclusion / exclusion criteria                                                                                                                                                                                                                                                                                                                                                                                                                                         | Intervention                                                                                                                               | Control                                                                    | Outcomes                                        | Results                                                       | Quality score Heterogeneity Publication bias                                                                      |
|---------------------------------|-----------------------------------------------------------------------------------------------------------------------------------------------------------------------------|------------------------------------------------------------------------------------------------------------------------------------------------------------------------------------------------------------------------------------------------------------------------------------------------------------------------------------------------------------------------------------------------------------------------------------------------------------------------|--------------------------------------------------------------------------------------------------------------------------------------------|----------------------------------------------------------------------------|-------------------------------------------------|---------------------------------------------------------------|-------------------------------------------------------------------------------------------------------------------|
|                                 | Embase and Central                                                                                                                                                          | outcomes: the number of patients who developed 1) at least one CRA, 2) more than one CRA, 3) at least one CRA that was 1 cm or greater, 4) at least one pathologic diagnosis of a tubulo-villous or villous CRA, 5) the new diagnosis of CRC, or 6) a change in polyp burden ("polyp burden" defined for each trial)<br><br><b>Exclusions:</b> not specified                                                                                                           |                                                                                                                                            |                                                                            |                                                 |                                                               |                                                                                                                   |
| Papaioannou et al, 2011 UK [45] | Up to March 2009<br><br>Cochrane Library, MEDLINE, PreMEDLINE, CINAHL, EMBASE, Web of Science, BIOSIS and Research Registers UKCRN, MRC Register, Current controlled trials | <b>Inclusions:</b> 1) RCT, 2) antioxidants (vitamin A, C and E, selenium or $\beta$ -carotene) with or without other agents, 3) adults, 4) general population 5) compared to no intervention, placebo or agents other than antioxidants,<br><br><b>Exclusions:</b> none of the inclusions<br><br><b>Population:</b> healthy populations and in populations with histories of cardiovascular disease; smoking or asbestos exposure; skin cancer; and atrophic gastritis | $\beta$ -carotene ( $\pm$ aspirin; studies with or without event data)<br><br>FU: 6 to 12 yrs                                              | No $\beta$ -carotene ( $\pm$ aspirin)                                      | <b>CRC incidence</b><br>3 RCT<br>N=36,812       | $\beta$ -carotene ( $\pm$ aspirin)<br><br>RR=1.09(0.78;1.51), | Quality performed: yes, with authors scale<br><br>Heterogeneity: $I^2=54\%$<br><br>Publication bias: not reported |
|                                 |                                                                                                                                                                             |                                                                                                                                                                                                                                                                                                                                                                                                                                                                        | $\beta$ -carotene ( $\pm$ aspirin; and adjusted for other antioxidants; studies with or without event data)<br><br>Follow up 6 to 12 Years | No $\beta$ -carotene ( $\pm$ aspirin; and adjusted for other antioxidants) | <b>CRC incidence</b><br>4 RCT<br>N=not reported | $\beta$ carotene ( $\pm$ aspirin)<br><br>RR=1.11 (0.84;1.47)  | Quality performed: yes, with authors scale<br><br>Heterogeneity: $I^2=26\%$<br><br>Publication bias: not reported |
| <b>SELENIUM</b>                 |                                                                                                                                                                             |                                                                                                                                                                                                                                                                                                                                                                                                                                                                        |                                                                                                                                            |                                                                            |                                                 |                                                               |                                                                                                                   |
| Papaioannou et al., 2011        | Up to March 2009                                                                                                                                                            | <b>Inclusions:</b> 1) RCT, 2) antioxidants (vitamin A, C and E, selenium or b-                                                                                                                                                                                                                                                                                                                                                                                         | Selenium alone                                                                                                                             | Placebo alone                                                              | <b>CRC incidence</b>                            | Selenium 200ug/d<br>RR=0.77(0.37; 1.62)                       | Quality performed: yes,                                                                                           |

| Study Country (Reference)            | Search period and databases searched                                                                                                                | Inclusion / exclusion criteria                                                                                                                                                                                                                                                                                                                                                                                                                                                                                                         | Intervention                                  | Control                    | Outcomes                                                      | Results                                                                                                 | Quality score Heterogeneity Publication bias                                                            |
|--------------------------------------|-----------------------------------------------------------------------------------------------------------------------------------------------------|----------------------------------------------------------------------------------------------------------------------------------------------------------------------------------------------------------------------------------------------------------------------------------------------------------------------------------------------------------------------------------------------------------------------------------------------------------------------------------------------------------------------------------------|-----------------------------------------------|----------------------------|---------------------------------------------------------------|---------------------------------------------------------------------------------------------------------|---------------------------------------------------------------------------------------------------------|
| UK [45]                              | Cochrane Library, MEDLINE, PreMEDLINE, CINAHL, EMBASE, Web of Science, BIOSIS and Research Registers UKCRN, MRC Register, Current controlled trials | carotene) with or without other agents, 3) adults , 4) general population 5) compared to no intervention, placebo or agents other than antioxidants,<br><br><b>Exclusions:</b> none of the inclusions<br><br><b>Population:</b> healthy populations and in populations with histories of cardiovascular disease; smoking or asbestos exposure; skin cancer; and atrophic gastritis                                                                                                                                                     | Follow up 5.5 to 8 Years                      |                            | 2 RCT<br>N=18,698                                             |                                                                                                         | with authors scale<br><br>Heterogeneity: $I^2=68\%$<br><br>Publication bias: not reported               |
| Pais et al., 2013 Romania [46]       | Up to May 2009<br><br>Cochrane Library, Medline                                                                                                     | <b>Inclusions:</b> 1) RCT, 2) antioxidants alone or in combination versus placebo or no intervention, 3) reported the incidence of colorectal cancer as primary or secondary outcome 4) global or cancer related mortality 5) participants had to be free of history of cancer (except skin cancer), 6) $\geq$ age 18 years, 2) general populations or from other patients groups primarily with non-GI diseases.<br><br><b>Exclusions:</b> 1) antioxidants supplementation through dietary increases in fruits, vegetables or fibers. | Vit A, C and E, selenium or b-carotene        | placebo or no intervention | CRC incidence<br><br>3 RCT (alone)<br><br>4 RCT (combination) | Selenium alone (100-200ug/day)<br>RR=0.77(0.36; 1.62)<br><br>Selenium combination<br>RR=0.88(0.55;1.40) | Quality not reported<br><br>Heterogeneity: Overall: $I^2 = 7\%$ , $p=0.38$<br><br>Publication bias: low |
| Bjelakovic et al., 2008 Denmark [43] | 1945-2007<br><br>CENTRAL, MEDLINE, EMBASE, LILACS, SCI-                                                                                             | <b>Inclusions:</b> 1) randomised trials, irrespective of blinding, publication status, publication year, or language, 2) adults, 3) antioxidant supplements at any dose, duration, and route of administration 4) compared to placebo or                                                                                                                                                                                                                                                                                               | Vit A, C and E, selenium or $\beta$ -carotene | placebo/no intervention    | CRC incidence*<br><br>1RCT<br>N=1,312                         | Selenium alone:<br>RR=0.48(0.22;1.05);                                                                  | Quality performed with a published scale<br><br>Heterogeneity: not applicable                           |

| Study Country (Reference)        | Search period and databases searched | Inclusion / exclusion criteria                                                                                                                                          | Intervention                                                                                        | Control                                                                                                             | Outcomes                             | Results                                                                                                                                                                                                                                                                                                           | Quality score Heterogeneity Publication bias                                                                                                                |
|----------------------------------|--------------------------------------|-------------------------------------------------------------------------------------------------------------------------------------------------------------------------|-----------------------------------------------------------------------------------------------------|---------------------------------------------------------------------------------------------------------------------|--------------------------------------|-------------------------------------------------------------------------------------------------------------------------------------------------------------------------------------------------------------------------------------------------------------------------------------------------------------------|-------------------------------------------------------------------------------------------------------------------------------------------------------------|
|                                  | EXPANDED                             | no intervention.                                                                                                                                                        |                                                                                                     |                                                                                                                     |                                      |                                                                                                                                                                                                                                                                                                                   | Test for overall effect: Z = 1.84 (P = 0.066)<br><br>Publication bias: unk for CRC                                                                          |
| <b>TEA</b>                       |                                      |                                                                                                                                                                         |                                                                                                     |                                                                                                                     |                                      |                                                                                                                                                                                                                                                                                                                   |                                                                                                                                                             |
| <b>Sun et al., 2006 USA [52]</b> | Jan 1966 to Jul 2005                 | <b>Inclusion:</b> 1) the number of CRC cases and Cohort studied; and/or 2) the OR or RR and its corresponding 95% CI, for highest versus non/lowest level of tea intake | Green tea<br>Highest tea consumption (varying cut-off 5 to 10 cup/day; 3500-8000g; daily; ever)     | Green tea<br>Lowest tea consumption or non drinkers (varying cut-off: 0-3 cups/days; rarely; <daily; rarely; never) | CRC risk<br><br>4Co; 4CC             | <b>Overall</b><br><b>OR=0.82(0.69; 0.98)</b><br>Cohort<br>OR=0.97(0.82; 1.16)<br><b>case-control</b><br><b>OR=0.74(0.63; 0.86)</b><br><br><u>Subgroup (overall)</u><br>Colon cancer<br>OR=0.86(0.73; 1.00)<br>Rectal cancer<br>OR=0.99(0.7; 1.37)<br>Women:<br>OR=0.52(0.25; 1.05)<br>Men:<br>OR=0.89(0.73; 1.08) | Quality not reported<br><br><b>Heterogeneity:</b><br>Overall: p=0.03<br>case-control: p=0.18<br>Cohort p=0.18<br><br><b>Publication bias:</b><br>Egger=0.98 |
|                                  |                                      |                                                                                                                                                                         | Black tea<br>Highest tea consumption (varying cut-off 1 to 5 cup/day; >160 g/month; daily; drinker) | Black tea<br>Lowest tea consumption (varying cut-off <1 to 3 cup/day; >800 g/month; rarely; non-drinker)            | CRC risk<br><br>7Co; 13 case-control | <b>Overall</b><br>OR=0.99(0.87; 1.13)<br>Cohort<br>OR=1.02(0.76; 1.34)<br>case-control<br>OR=0.92(0.78; 1.09)<br><br><u>Subgroup (overall)</u><br>Colon cancer<br>OR=1.02(0.88; 1.18)<br>Rectal cancer                                                                                                            | Quality not reported<br><br><b>Heterogeneity:</b><br>Overall: p<0.01<br>case-control: p<0.01<br>Cohort p=0<0.01<br><br><b>Publication bias:</b>             |

| Study Country (Reference)            | Search period and databases searched | Inclusion / exclusion criteria                                                                                                                                                                                                                                                                                                                                                                                                           | Intervention                                                                      | Control                                                                       | Outcomes                  | Results                                                                                                                                                                                    | Quality score Heterogeneity Publication bias                                         |
|--------------------------------------|--------------------------------------|------------------------------------------------------------------------------------------------------------------------------------------------------------------------------------------------------------------------------------------------------------------------------------------------------------------------------------------------------------------------------------------------------------------------------------------|-----------------------------------------------------------------------------------|-------------------------------------------------------------------------------|---------------------------|--------------------------------------------------------------------------------------------------------------------------------------------------------------------------------------------|--------------------------------------------------------------------------------------|
|                                      |                                      |                                                                                                                                                                                                                                                                                                                                                                                                                                          |                                                                                   |                                                                               |                           | OR=0.91(0.73; 1.12)<br><b>Women:</b><br><b>OR=0.82(0.70; 0.95)</b><br>Men:<br>OR=1.15(0.89; 1.50)                                                                                          | Egger=0.1                                                                            |
| <b>Wang et al., 2012 China [49]</b>  | up to May, 2012                      | <b>Inclusions:</b> 1) case-control study; 2) tested the association between green tea and CRC risk; 3) the cancer type did not contain adenocarcinoma; 4) the diagnoses of CRC was confirmed either histological, pathologically or cytological; 5) the site of cancer included colon, rectum, or colorectum; 6) the adjusted OR and relevant corresponding 95% CIs were reported, for highest vs. non/lowest level of green tea intake. | Highest green tea intake (varying cut-off 1 to 7 cup/day; >8500 g/month; drinker) | Lowest green tea intake (varying cut-off <1 cup/day; <g/month; non drinkers)  | CRC                       | <b>Overall</b><br>OR=0.99(0.87; 1.13)                                                                                                                                                      | <b>Heterogeneity:</b><br>P=0.49;<br><br>No publication bias                          |
|                                      |                                      |                                                                                                                                                                                                                                                                                                                                                                                                                                          |                                                                                   |                                                                               | Colon cancer risk         | OR=0.96(0.08; 1.16)                                                                                                                                                                        | <b>Heterogeneity:</b><br>P<0.01; I <sup>2</sup> =0.61;                               |
|                                      |                                      |                                                                                                                                                                                                                                                                                                                                                                                                                                          |                                                                                   |                                                                               | 8CC<br>Rectal cancer risk | OR=0.96(0.73; 1.26)                                                                                                                                                                        | <b>Heterogeneity:</b><br>P<0.01; I <sup>2</sup> =0.68;                               |
| <b>Zhang et al., 2015 China [50]</b> | up to October 2013                   | <b>Inclusions:</b> 1) prospective observational design; 2) address the association between tea consumption and the risk of cancer incidence; and 3) includes comparisons between high and low tea consumption (with >2 categories) and estimates of the effect as RR, HR or OR with 95% CIs                                                                                                                                              | Highest tea consumption (green, black and mixed tea)- no assessment of cut-off    | Lowest tea consumption (green, black and mixed tea)- no assessment of cut-off | Colon cancer risk         | RR=0.95(0.84; 1.07)<br><br>Dose-response analysis for one cup day increment<br>RR=0.98(0.93; 1.02)<br><br><b>Subgroup:</b><br>Women:<br>RR=0.98(0.93; 1.03)<br>Men:<br>RR=0.91(0.78; 1.06) | <b>Heterogeneity:</b><br>P=0.08;<br>I <sup>2</sup> =34.5%<br><br>No publication bias |
|                                      |                                      |                                                                                                                                                                                                                                                                                                                                                                                                                                          |                                                                                   |                                                                               | Rectal cancer risk        | RR=1.03(0.88; 1.21)<br><br>Dose-response analysis for one                                                                                                                                  | <b>Heterogeneity:</b><br>P=0.16;<br>I <sup>2</sup> =27.2%                            |

| Study Country (Reference)    | Search period and databases searched | Inclusion / exclusion criteria                                                                                                                                                                                                                                           | Intervention                                                                   | Control                                                                       | Outcomes                                                 | Results                                                                                                                           | Quality score Heterogeneity Publication bias                                                                                                |
|------------------------------|--------------------------------------|--------------------------------------------------------------------------------------------------------------------------------------------------------------------------------------------------------------------------------------------------------------------------|--------------------------------------------------------------------------------|-------------------------------------------------------------------------------|----------------------------------------------------------|-----------------------------------------------------------------------------------------------------------------------------------|---------------------------------------------------------------------------------------------------------------------------------------------|
|                              |                                      |                                                                                                                                                                                                                                                                          |                                                                                |                                                                               | 9716 cases; 1 154 458 patients<br><br>FU:4.3- 20.0 years | cup/day increment:<br>RR=1.01(0.97; 1.05)<br><br><u>Subgroup:</u><br>Women:<br>RR=0.98(0.92; 1.05)<br>Men:<br>RR=1.07(0.98; 1.17) | No publication bias                                                                                                                         |
| Vieira et al., 2017 UK [27]  | Up to May 2015                       | <b>Inclusion:</b> 1) RCT, Cohort or case-control design, 2) report adjusted estimates of the RR and 95% CIs for the association of foods and CRC incidence; 3) for dose-response meta-analysis, studies should provide a quantitative measure of the intake.             | Dose response<br>Incremental of 1 cup/day                                      |                                                                               | CRC risk<br><br>8 case-control<br>16251 Cases            | OR=0.99(0.97; 1.01)                                                                                                               | <b>No assessment of quality</b><br><br><b>Heterogeneity:</b><br>P=0.05; I <sup>2</sup> =44%<br><br><b>Publication bias:</b><br>Egger p=0.42 |
|                              |                                      |                                                                                                                                                                                                                                                                          |                                                                                |                                                                               | Colon cancer risk<br><br>6CC<br>13244 cases              | OR=0.99(0.94; 1.03)                                                                                                               | <b>Heterogeneity:</b><br>P<0.01; I <sup>2</sup> =75%<br><br><b>Publication bias:</b><br>Egger p=0.33                                        |
|                              |                                      |                                                                                                                                                                                                                                                                          |                                                                                |                                                                               | Rectal cancer risk<br><br>9CC<br>4621 cases              | OR=0.99(0.97; 1.02)                                                                                                               | <b>Heterogeneity:</b><br>P=0.47; I <sup>2</sup> =0%<br><br><b>Publication bias:</b><br>Egger p=0.04                                         |
| Chen et al., 2017 China [51] | Up to June 2016                      | <b>Inclusions:</b> 1) case-control or Cohort study; b) evaluated the associations between tea consumption and CRC risk; 3) all CRC cases were either histopathologically or cytologically confirmed; 4) provided the quantity of CRC cases and controls or person-years; | Highest tea consumption (green, black and mixed tea)- no assessment of cut-off | Lowest tea consumption (green, black and mixed tea)- no assessment of cut-off | CRC incidence<br><br>17Co<br>12CC<br>1,642,007 patients  | OR=0.93(0.87; 1.00)<br><br>Dose response analysis: consumption of 1c/d<br>OR=1.01(0.99; 1.03)                                     | Assessment of individual quality study<br><br><b>Heterogeneity:</b><br>P<0.01; I <sup>2</sup> =43%                                          |

| Study Country (Reference)      | Search period and databases searched | Inclusion / exclusion criteria                                                                                                                                                                                                                                                                                                                                                                                                                        | Intervention                 | Control                     | Outcomes                                        | Results                                                                                                                                                                                                                                    | Quality score Heterogeneity Publication bias                                                                                  |
|--------------------------------|--------------------------------------|-------------------------------------------------------------------------------------------------------------------------------------------------------------------------------------------------------------------------------------------------------------------------------------------------------------------------------------------------------------------------------------------------------------------------------------------------------|------------------------------|-----------------------------|-------------------------------------------------|--------------------------------------------------------------------------------------------------------------------------------------------------------------------------------------------------------------------------------------------|-------------------------------------------------------------------------------------------------------------------------------|
|                                |                                      | 5) RRs or ORs with corresponding 95% CIs, especially for highest vs. non/lowest level of tea consumption                                                                                                                                                                                                                                                                                                                                              |                              |                             |                                                 | Subgroup:<br>Women:<br><b>OR=0.86(0.78; 0.94)</b><br>Men:<br>RR=0.98(0.85; 1.12)                                                                                                                                                           | <b>Publication bias:</b><br>Egger p=0.04                                                                                      |
|                                |                                      |                                                                                                                                                                                                                                                                                                                                                                                                                                                       |                              |                             | Colon cancer risk<br>22Co or case-control       | OR=0.92 (0.79 1.06)                                                                                                                                                                                                                        | <b>Heterogeneity:</b><br>P<0.01; I <sup>2</sup> =42%                                                                          |
|                                |                                      |                                                                                                                                                                                                                                                                                                                                                                                                                                                       |                              |                             | Rectal cancer risk<br>19 Cohort or case-control | <b>OR=0.91(0.85; 0.99)</b>                                                                                                                                                                                                                 | <b>Heterogeneity:</b><br>P<0.05; I <sup>2</sup> =31%                                                                          |
| <b>ALLIUM AND GARLIC</b>       |                                      |                                                                                                                                                                                                                                                                                                                                                                                                                                                       |                              |                             |                                                 |                                                                                                                                                                                                                                            |                                                                                                                               |
| Zhu et al., 2014 [54]          | up to October 2013                   | <b>Inclusions</b> (1) Cohort or case-control; (2) relationship of allium vegetables or garlic supplements and CRC risk; and (3) the study provided or allowed the calculation of RR with 95% CIs                                                                                                                                                                                                                                                      | High intake allium vegetable | Low intake allium vegetable | CRC Risk<br><br>20 case-control or Cohort       | RR=1.06(0.96; 1.17)<br><br>Dose response once-per-week increment<br>RR=1.01(1.00; 1.02)                                                                                                                                                    | Quality not reported<br><br><b>Heterogeneity:</b><br>p=0.94; I <sup>2</sup> =0%<br><br>Publication bias<br>Egger p=0.35       |
| Turati et al., 2014 Italy [55] | April 2014                           | <b>Inclusions</b> 1) had a case-control or Cohort study design, 2) the outcome was colorectal (or colon, or rectal) cancer or colorectal adenomatous polyps incidence/death, 3) examined the association with allium vegetables (including garlic, onions, leeks, and others), 4) provided the RR estimates with their CIs, or data necessary to calculate them<br><b>Exclusion:</b> No studies were excluded a priori for weakness of design or data |                              |                             | CRC risk<br>16 Studies                          | Garlic overall<br>RR=0.85 (0.72;1.00)<br>Garlic case-control studies<br><b>RR=0.76 (0.67;0.85)</b><br>Garlic Cohort studies<br>RR=0.99 (0.80;1.23)<br><br>Onion<br>RR=0.85 (0.70;1.04)<br>Onion case-control<br><b>RR=0.74 (0.56;0.98)</b> | Quality not reported<br><br><b>Heterogeneity:</b><br>p = 0.017,<br>I <sup>2</sup> = 57.2%<br>Publication bias<br>Egger p=0.35 |

| Study Country (Reference)         | Search period and databases searched                   | Inclusion / exclusion criteria                                                                                                                                                                                                                                                                                                                                                                                   | Intervention                                                              | Control   | Outcomes                                         | Results                                                                                                                                                        | Quality score Heterogeneity Publication bias                                                                                    |
|-----------------------------------|--------------------------------------------------------|------------------------------------------------------------------------------------------------------------------------------------------------------------------------------------------------------------------------------------------------------------------------------------------------------------------------------------------------------------------------------------------------------------------|---------------------------------------------------------------------------|-----------|--------------------------------------------------|----------------------------------------------------------------------------------------------------------------------------------------------------------------|---------------------------------------------------------------------------------------------------------------------------------|
|                                   |                                                        | quality                                                                                                                                                                                                                                                                                                                                                                                                          |                                                                           |           |                                                  | Onion Cohort<br>RR=1.04 (0.86;1.26)<br><br>Total allium overall<br>RR=0.78 (0.56;1.06)<br>case-control<br>RR=0.69 (0.43;1.09)<br>Cohort<br>RR=0.99 (0.77;1.27) |                                                                                                                                 |
|                                   |                                                        |                                                                                                                                                                                                                                                                                                                                                                                                                  |                                                                           |           | Colon cancer risk                                | Garlic<br>RR=0.90 (0.75;1.08)<br><br>Onion<br>RR=0.72(0.44;1.19)                                                                                               |                                                                                                                                 |
|                                   |                                                        |                                                                                                                                                                                                                                                                                                                                                                                                                  |                                                                           |           | Rectal cancer risk                               | Garlic<br><b>0.76 (0.59; 0.98)</b><br>Onion<br>0.70 (0.39; 1.25)                                                                                               |                                                                                                                                 |
| Heine-Bröring et al., 2015 [22]   | Up to January 2013<br><br>Medline, Embase and Cochrane | <b>Inclusions:</b> prospective Cohort studies if they reported original and peer-reviewed data on the association of dietary supplement use and colorectal, colon, or rectal cancer incidence. To be included in the meta-analyses, information on ascertainment of CRC cases, and estimates of the RR with 95% CI were required<br><br><b>Exclusions:</b> studies on colorectal adenomas, RCTs and case-control | Intake of multivitamins, Vit A, Vit C, Vit E, Vit D, Calcium* and Garlic. | No intake | CRC incidence<br>2 Cohort for Garlic             | Garlic<br>RR=1.24(0.99; 1.54)                                                                                                                                  | Quality performed: none<br><br>Heterogeneity:<br><br>Garlic<br>I <sup>2</sup> =0%; p=0.34<br><br>Publication bias: not reported |
| <b>Hu et al., 2014 China</b> [53] | <b>up to October 2013</b>                              | Inclusions: (1) Cohort; (2) evaluated the association between garlic consumption and risk of colorectal cancer; and (3) reported HR or RR with corresponding 95%CI, or data necessary to calculate them                                                                                                                                                                                                          | Overall garlic intake                                                     |           | CRC Risk<br><br>5 Cohort<br><br>335,923 subjects | RR=1.03(0.83; 1.28)                                                                                                                                            | High quality studies (8 or 9 on the NOS)<br><br><b>Heterogeneity:</b><br>p=0.54; I <sup>2</sup> =0%                             |



| Study Country (Reference) | Search period and databases searched | Inclusion / exclusion criteria | Intervention             | Control | Outcomes                                                 | Results                                                                                                 | Quality score<br>Heterogeneity<br>Publication bias                                                                          |
|---------------------------|--------------------------------------|--------------------------------|--------------------------|---------|----------------------------------------------------------|---------------------------------------------------------------------------------------------------------|-----------------------------------------------------------------------------------------------------------------------------|
|                           |                                      |                                |                          |         | 4,610 cases<br><br>follow up<br>3.3 years to<br>24 years |                                                                                                         |                                                                                                                             |
|                           |                                      |                                | Garlic Raw<br>and cooked |         | CRC Risk<br>4 Cohort                                     | RR=1.07(0.95;1.19),<br><br>Subgroup :<br>Males<br>RR=1.18(0.99; 1.41)<br>Females<br>RR=1.04(0.80; 1.30) | High quality<br>studies<br><br><b>Heterogeneity:</b><br>p=0.66; I <sup>2</sup> =0%<br><br>publication bias:<br>Egger p=0.50 |
|                           |                                      |                                |                          |         | Colon<br>cancer Risk<br>4 Cohort                         | RR=1.07(0.94; 1.21)                                                                                     | High quality<br>studies<br><br><b>Heterogeneity:</b><br>p=0.63; I <sup>2</sup> =0%<br><br>publication bias:<br>Egger p=0.23 |
|                           |                                      |                                |                          |         | Rectal<br>cancer<br>3 Cohort                             | RR=1.02(0.90; 1.17)                                                                                     | High quality<br>studies<br><br><b>Heterogeneity:</b><br>p=0.93; I <sup>2</sup> =0%<br><br>publication bias:<br>Egger p=0.59 |
|                           |                                      |                                | Garlic<br>supplement     |         | CRC Risk<br>5 Cohort                                     | RR=1.12(0.96; 1.31)                                                                                     | High quality<br>studies<br><br><b>Heterogeneity:</b><br>p=0.47; I <sup>2</sup> =11%<br><br>publication bias:                |

| Study Country (Reference)   | Search period and databases searched | Inclusion / exclusion criteria                                                                                                                                                                                                                                                                                                                                                                                              | Intervention          | Control                 | Outcomes                                  | Results                                 | Quality score Heterogeneity Publication bias                                                                                |
|-----------------------------|--------------------------------------|-----------------------------------------------------------------------------------------------------------------------------------------------------------------------------------------------------------------------------------------------------------------------------------------------------------------------------------------------------------------------------------------------------------------------------|-----------------------|-------------------------|-------------------------------------------|-----------------------------------------|-----------------------------------------------------------------------------------------------------------------------------|
|                             |                                      |                                                                                                                                                                                                                                                                                                                                                                                                                             |                       |                         | Colon cancer Risk 3 Cohort                | RR=1.01(0.77; 1.32)                     | Egger p=0.61<br>High quality studies<br><b>Heterogeneity:</b> p=0.47; I <sup>2</sup> =15%<br>publication bias: Egger p=0.58 |
|                             |                                      |                                                                                                                                                                                                                                                                                                                                                                                                                             |                       |                         | Rectal cancer 3 Cohort                    | RR=1.17(0.74; 1.83)                     | High quality studies<br><b>Heterogeneity:</b> p=0.41; I <sup>2</sup> =0%<br>publication bias: Egger p=0.31                  |
| <b>Vitamin D</b>            |                                      |                                                                                                                                                                                                                                                                                                                                                                                                                             |                       |                         |                                           |                                         |                                                                                                                             |
| Liu et al., 2015 China [23] | Up to April 2014<br>Pubmed           | Inclusions: [1] they were cohort studies [2]; the exposure of interest was vitamin or multiple-vitamin supplement intake [3]; the outcome of interest was the incidence of colorectal, colon, or rectal cancer [4]; relative risk (RR) or odds ratio (OR) estimates with 95 % confidence intervals (95 % CI) were reported; [5] Newcastle-Ottawa Scale (NOS) quality grade for cohort studies in meta-analyses [69] was >6. | highest level vitamin | Lowest level of vitamin | CRC incidence<br>17 CO for Vit D<br>N=unk | Vit D:<br><b>RR = 0.87 (0.77; 0.99)</b> | Quality performed: NOS, only >6<br><br>Heterogeneity: Vit D: I <sup>2</sup> = 41%;<br><br>Publication bias: Vit D: p=0.51   |

| Study Country (Reference)       | Search period and databases searched                   | Inclusion / exclusion criteria                                                                                                                                                                                                                                                                                                                                                                                                                                                                          | Intervention                                                               | Control                                                                   | Outcomes                                    | Results                         | Quality score Heterogeneity Publication bias                                                                              |
|---------------------------------|--------------------------------------------------------|---------------------------------------------------------------------------------------------------------------------------------------------------------------------------------------------------------------------------------------------------------------------------------------------------------------------------------------------------------------------------------------------------------------------------------------------------------------------------------------------------------|----------------------------------------------------------------------------|---------------------------------------------------------------------------|---------------------------------------------|---------------------------------|---------------------------------------------------------------------------------------------------------------------------|
|                                 |                                                        | Exclusions: Articles with <6 stars were excluded.                                                                                                                                                                                                                                                                                                                                                                                                                                                       |                                                                            |                                                                           |                                             |                                 |                                                                                                                           |
| Heine-Bröring et al., 2015 [22] | Up to January 2013<br><br>Medline, Embase and Cochrane | Inclusions: prospective cohort studies if they reported original and peer-reviewed data on the association of dietary supplement use and colorectal, colon, or rectal cancer incidence. To be included in the meta-analyses, information on ascertainment of colorectal cancer cases, and estimates of the relative risk with 95% confidence intervals (95% CI) were required                                                                                                                           | Intake of multivitamins, Vit A, Vit C, Vit E, Vit D, Calcium* and Garlic.  | No intake                                                                 | CRC incidence<br>5 Cohort for Vit D         | Vit D<br>RR = 0.92 (0.78; 1.09) | Quality performed: none<br><br>Heterogeneity: Vit D<br>I <sup>2</sup> =54%; p=0.07<br><br>Publication bias: not reported  |
|                                 |                                                        | Exclusions: studies on colorectal adenomas were excluded, randomized controlled trials and case-control studies were excluded                                                                                                                                                                                                                                                                                                                                                                           | Highest level of multivitamins, Vit A, Vit C, Vit E, Vit D, Ca and Garlic. | Lowest level of multivitamins, Vit A, Vit C, Vit E, Vit D, Ca and Garlic. | CRC incidence<br>4 COHORT for Vit D         | Vit D<br>RR = 0.87 (0.62-1.22)  | Quality performed: none<br><br>Heterogeneity: Vit D:<br>I <sup>2</sup> =67%; p=0.03<br><br>Publication bias: not reported |
| Chung et al., 2011 USA [56]     | Up to July 2011<br><br>MEDLINE and Central             | <b>Inclusions:</b> articles about human participants published in English-language journals. RCT<br><br><b>Exclusions:</b> studies that enrolled pregnant women only or measured vitamin D status only during pregnancy and RCTs comparing different dosages of vitamin D supplementation without a control group that did not receive vitamin D supplementation. We excluded short-term (1 month) RCTs and trials that used synthetic vitamin D analogues (for example, oxacalcitriol or paricalcitol) | Vit D<br>100,000UI/4 months for 5 years<br><br>Follow-up: 5 years          | Placebo                                                                   | CRC incidence<br><br>1 RCT<br>N= 2686 Vit D | HR=1.02 (0.60-1.74)             | Quality performed yes: fair<br><br>Heterogeneity: unk<br><br>Publication bias: unk                                        |

| Study Country (Reference)    | Search period and databases searched                                                                                                                               | Inclusion / exclusion criteria                                                                                                                                                                                                                                                                                                                                                                                                                                                | Intervention                                                             | Control                                                                                                    | Outcomes                                                        | Results                                                                             | Quality score Heterogeneity Publication bias                                                                                                                     |
|------------------------------|--------------------------------------------------------------------------------------------------------------------------------------------------------------------|-------------------------------------------------------------------------------------------------------------------------------------------------------------------------------------------------------------------------------------------------------------------------------------------------------------------------------------------------------------------------------------------------------------------------------------------------------------------------------|--------------------------------------------------------------------------|------------------------------------------------------------------------------------------------------------|-----------------------------------------------------------------|-------------------------------------------------------------------------------------|------------------------------------------------------------------------------------------------------------------------------------------------------------------|
|                              |                                                                                                                                                                    | Population: Elderly 65-85 for vit D alone, and post-menopausal women > 40 years old un Vit D+Ca                                                                                                                                                                                                                                                                                                                                                                               |                                                                          |                                                                                                            |                                                                 |                                                                                     |                                                                                                                                                                  |
| Ma et al., 2011 China [57]   | Up to October 2010<br><br>MEDLINE and EMBASE                                                                                                                       | Studies were included in the meta-analysis if they met the following criteria: prospective design; the study of interest was the intake of vitaminD or the levels of 25(OH)D in the blood (plasma or serum); the outcome of interest was colorectal, colon, or rectal cancer; and the relative risk (RR) estimates with 95% CIs (or data to calculate these) were reported. Where data sets overlapped or were duplicated, only the most recent information was included. All | Highest category of vit D intake<br><br>FU : 4-13years.                  | Lowest category of vit D intake                                                                            | CRC incidence<br><br>8 COHORT and 1 case-control<br><br>N=6,466 | <b>RR = 0.88 (0.80; 0.96)</b>                                                       | Quality performed NOS, 6 or 7 stars<br><br>Heterogeneity: I <sup>2</sup> = 27%, p=0.19<br><br>Publication bias: unk                                              |
| <b>Vitamin D and Calcium</b> |                                                                                                                                                                    |                                                                                                                                                                                                                                                                                                                                                                                                                                                                               |                                                                          |                                                                                                            |                                                                 |                                                                                     |                                                                                                                                                                  |
| Carroll et al., 2010 UK [58] | up to January 2010<br><br>Cochrane Library, MEDLINE, PreMEDLINE, CINAHL, EMBASE, Web of Science, Biological Abstracts, the National Research Register, and Current | <b>Inclusions:</b> 1) RCTs of calcium (with or without other chemopreventive agents) 2) adults with FAP, HNPCC, or a history of colorectal adenomas, or with no increased baseline risk of CRC 3) comparators were specified as either placebo or agents other than calcium, 4) outcomes included the recurrence of adenomas or advanced adenomas, or the occurrence of colorectal cancer.<br><br><b>Population:</b> Populations with no history of adenomas or CRC.          | Calcium 1000-1500mg/day + Vit D 400-1100 UI/d<br>Follow up: 4 or 7 years | Calcium with or without other chemopreventive agents versus placebo (with or without other interventions ) | CRC incidence<br>2 RCTs<br>N=37,016                             | 1) Ca + Vit D:<br>RR=1.08(0.87; 1.34)<br><br>2) Ca+/- Vit D:<br>RR=0.62(0.11; 3.40) | Quality not reported<br><br>Heterogeneity:<br>Ca + Vit D:<br>I <sup>2</sup> =0%.<br>Ca+/- Vit D:<br>I <sup>2</sup> =58%<br><br>Publication bias:<br>Not reported |

| Study Country (Reference)           | Search period and databases searched       | Inclusion / exclusion criteria                                                                                                                                                                                                                                                                                                                                                                                                                                                                                                                                                                                  | Intervention                              | Control | Outcomes                               | Results             | Quality score Heterogeneity Publication bias                                       |
|-------------------------------------|--------------------------------------------|-----------------------------------------------------------------------------------------------------------------------------------------------------------------------------------------------------------------------------------------------------------------------------------------------------------------------------------------------------------------------------------------------------------------------------------------------------------------------------------------------------------------------------------------------------------------------------------------------------------------|-------------------------------------------|---------|----------------------------------------|---------------------|------------------------------------------------------------------------------------|
|                                     | Controlled Trials                          |                                                                                                                                                                                                                                                                                                                                                                                                                                                                                                                                                                                                                 |                                           |         |                                        |                     |                                                                                    |
| Chung et al., 2011**<br>USA<br>[56] | Up to July 2011<br><br>MEDLINE and Central | <p><b>Inclusions:</b> articles about human participants published in English-language journals. RCT</p> <p><b>Exclusions:</b> studies that enrolled pregnant women only or measured Vit D status only during pregnancy and RCTs comparing different dosages of Vit D supplementation without a control group that did not receive Vit D supplementation. We excluded short-term (1 month) RCTs and trials that used synthetic Vit D analogues (for example, oxacalcitriol or paricalcitol)</p> <p><b>Population:</b> Elderly 65-85 for vit D alone, and post-menopausal women &gt; 40 years old un Vit D+Ca</p> | Vit D + calcium<br><br>Follow-up: 7 years | Placebo | CRC incidence<br><br>1 RCT<br>N=36,282 | HR=1.08(0.86; 1.34) | Quality performed yes: good<br><br>Heterogeneity: unk<br><br>Publication bias: unk |

aRR: adjusted risk ratio, Ca: calcium, CI: confidence interval, CRA: colorectal adenoma, CRC: colorectal cancer, FU: follow-up, GI: gastro-intestinal, HR: hazard ratio, Mg: magnesium, NS: not specified, NSAID: non-steroidal anti-inflammatory drugs, NOS: Newcastle-Ottawa Scale, OR: odds ratio, RCT: randomised clinical trial, RR: risk ratio, unk: unknown, Vit: vitamin;

A: includes also the comparisons of Vit E + b-Carotene vs placebo; Vit A + b-Carotene vs placebo; Vit E + selenium alone vs placebo; Vit CE + b-Carotene ( $\pm$  simvastatin) vs Placebo ( $\pm$  simvastatin); Vit CE + b-Carotene + selenium + zinc vs placebo. All were had not significant risk ratios

\* See calcium section; \*\* not primary outcome

Supplementary Table 3. Component with unclear effect on CRC prevention

| Study Country (Reference)               | Search period and databases searched    | Inclusions / exclusions                                                                                       | Intervention                                                          | Control                                           | Outcomes                                                                    | Results*                                                                                                                                             | Quality score Heterogeneity Publication bias                                                                                                                 |
|-----------------------------------------|-----------------------------------------|---------------------------------------------------------------------------------------------------------------|-----------------------------------------------------------------------|---------------------------------------------------|-----------------------------------------------------------------------------|------------------------------------------------------------------------------------------------------------------------------------------------------|--------------------------------------------------------------------------------------------------------------------------------------------------------------|
| <b>COFFEE AND CAFFEINE</b>              |                                         |                                                                                                               |                                                                       |                                                   |                                                                             |                                                                                                                                                      |                                                                                                                                                              |
| <b>Giovannuci et al., 1998 USA</b> [59] | <b>Up to 1997 Medline and cancerlit</b> | <b>Inclusion:</b> all pertinent publications on coffee consumption and risk of CRC.                           | Highest coffee consumption (approx. 4 cups per day)<br><br>FU: 1-8yrs | Lowest coffee consumption (approx. 1 cup per day) | CRC risk<br><br>12 case-control; 5 Cohort<br>6192 Cases                     | <b>case-control and Cohort</b><br><b>RR=0.76(0.66; 0.89)</b><br><b>case-control:</b><br><b>RR=0.72(0.61; 0.84)</b><br>Cohort:<br>RR=0.97(0.73; 1.29) | Quality not reported<br><br><b>Heterogeneity:</b><br>case-control and Cohort, p<0.01<br>case-control: p<0.01<br>Cohort; p=0.83                               |
| <b>Je et al., 2009 USA</b> [60]         | <b>Up to June 2008 Medline</b>          | <b>Inclusion:</b> prospective Cohort studies on the association between coffee consumption and CRC incidence. | Highest coffee consumption (varying cut-off from 1 to 6)              | Lowest coffee consumption (varying cut-off)       | CRC risk<br><br>12Co<br>646,848 patients and 5,403 cases<br>Fu of 9.8 years | <b>Cohort:</b><br>RR=0.91(0.81; 1.02)                                                                                                                | Quality not reported<br><br><b>Heterogeneity:</b><br>Cohort: p=0.73;<br>I <sup>2</sup> =0%<br><br><b>Publication bias:</b><br>Begg's and Egger's tests > 0.4 |

| Study Country (Reference)       | Search period and databases searched | Inclusions / exclusions                                                                                                                                                                                                                                                                                                                                                                      | Intervention               | Control                 | Outcomes                                             | Results*                  | Quality score Heterogeneity Publication bias                                                                                |                           |                                                                                |
|---------------------------------|--------------------------------------|----------------------------------------------------------------------------------------------------------------------------------------------------------------------------------------------------------------------------------------------------------------------------------------------------------------------------------------------------------------------------------------------|----------------------------|-------------------------|------------------------------------------------------|---------------------------|-----------------------------------------------------------------------------------------------------------------------------|---------------------------|--------------------------------------------------------------------------------|
| Galeone et al., 2010 Italy [61] | 1966 to May 2010<br><br>Medline      | <b>Inclusions:</b> 1) quantitative estimate; (2) at least one of the following: the 95% CI, or standard error, or the distribution of cases and controls in coffee consumption categories, or the p-value for the difference of the OR from unity<br><br><b>Exclusions:</b> data for caffeine rather than coffee, or if they were based on data updated later, or if part of pooled analyses | Drinkers<br><br>FU: 1-8yrs | Non/occasional drinkers | CRC incidence<br>13 studies;<br>9568 cases           | <b>OR=0.83(0.73;0.95)</b> | Quality: not reported<br><br><b>Heterogeneity:</b> p<0.01; I <sup>2</sup> =80%<br><br><b>Publication bias:</b> None overall |                           |                                                                                |
|                                 |                                      |                                                                                                                                                                                                                                                                                                                                                                                              |                            |                         | Colon cancer incidence<br>11 studies;<br>7537 cases  | OR=0.93(0.81; 1.07)       | Quality: not reported<br><br><b>Heterogeneity:</b> p<0.01; I <sup>2</sup> =82%                                              |                           |                                                                                |
|                                 |                                      |                                                                                                                                                                                                                                                                                                                                                                                              |                            |                         | Rectal cancer incidence<br>10 studies,<br>4594 cases | OR=0.98(0.85; 1.13)       | Quality: not reported<br><br><b>Heterogeneity:</b> p<0.01; I <sup>2</sup> =71%                                              |                           |                                                                                |
|                                 |                                      |                                                                                                                                                                                                                                                                                                                                                                                              | Increment of 1 cup/day     |                         |                                                      |                           | CRC incidence<br>13 studies;<br>9380 cases                                                                                  | <b>OR=0.94(0.91;0.98)</b> | Quality: not reported<br><br><b>Heterogeneity:</b> p<0.01; I <sup>2</sup> =69% |
|                                 |                                      |                                                                                                                                                                                                                                                                                                                                                                                              |                            |                         |                                                      |                           | Colon cancer incidence<br>12 studies;<br>7713 cases                                                                         | <b>OR=0.95(0.92;0.98)</b> | Quality: not reported<br><br><b>Heterogeneity:</b> p<0.01; I <sup>2</sup> =61% |
|                                 |                                      |                                                                                                                                                                                                                                                                                                                                                                                              |                            |                         |                                                      |                           | Colon cancer incidence                                                                                                      | <b>OR=0.97(0.95;0.99)</b> | Quality: not reported<br><br><b>Heterogeneity:</b> P=0.34; I <sup>2</sup> =10% |
|                                 |                                      |                                                                                                                                                                                                                                                                                                                                                                                              |                            |                         |                                                      |                           |                                                                                                                             |                           |                                                                                |

| Study Country (Reference)           | Search period and databases searched                                                                                                   | Inclusions / exclusions                                                                                                                                                                               | Intervention                                 | Control                                         | Outcomes                                                                                                                                  | Results*                                                                                                                                                                                                                                 | Quality score Heterogeneity Publication bias                                                                                                          |
|-------------------------------------|----------------------------------------------------------------------------------------------------------------------------------------|-------------------------------------------------------------------------------------------------------------------------------------------------------------------------------------------------------|----------------------------------------------|-------------------------------------------------|-------------------------------------------------------------------------------------------------------------------------------------------|------------------------------------------------------------------------------------------------------------------------------------------------------------------------------------------------------------------------------------------|-------------------------------------------------------------------------------------------------------------------------------------------------------|
| Li et al., 2013<br>China<br>[62]    | May 2011<br><br>MEDLINE,<br>the Cochrane<br>Controlled<br>Trials<br>Register,<br>EMBASE,<br>Science<br>Citation<br>Index and<br>PubMed | <b>Inclusions:</b> 1) a quantitative estimate of the relationship; and 2) at least one of the 95%CI or the standard error or the distribution of cases and controls in coffee consumption categories. | Highest coffee consumption (varying cut-off) | Lowest/non coffee consumption (varying cut-off) | CRC risk<br><br>25 case-control, 16 Cohort<br>case-control : 15 522 cases, Cohort 953 669 participants and 10 443 cases<br>FU: 10.5 years | <b>Cohort</b><br>OR=0.91(0.81;1.02)<br><br><b>Subgroup :</b><br>Colon cancer<br><b>OR=0.79(0.67;0.95)</b><br>Rectal cancer:<br>OR=0.95(0.79; 1.15)<br>Colorectal women :<br>OR=0.93(0.81; 1.05)<br>Colorectal men<br>OR=0.97(0.87; 1.08) | Quality not reported<br><br><b>Heterogeneity:</b><br>Cohort: p<0.01; I <sup>2</sup> =64%<br><br><b>Publication bias:</b><br>Begg p=0.63<br>Egger=0.69 |
| Akter et al., 2016<br>Japan<br>[63] | Up to August 2015<br><br>Medline and Ichushi                                                                                           | <b>Inclusions:</b> Only studies on Japanese populations living in Japan were included, written in English or Japanese                                                                                 | Highest coffee consumption (varying cut-off) | Lowest coffee consumption (varying cut-off)     | CRC risk<br>9 case-control and 4 Cohort (1 Cohort included death and was removed in this sensitivity analysis)                            | RR=0.98 (0.80;1.22)                                                                                                                                                                                                                      | Quality score; not done for subgroup<br><br>Heterogeneity: not done for subgroup<br><br>Publication bias: not done for subgroup                       |
| Gan et al., 2017<br>China<br>[64]   | Up to August 2015<br><br>PubMed, Embase, and Web of Science                                                                            | <b>Inclusions:</b> not specified<br><br><b>Exclusions:</b> not specified                                                                                                                              | Highest coffee consumption (varying cut-off) | Lowest coffee consumption (varying cut-off)     | CRC risk:<br>19 case-control or Cohort<br><br>2,046,575 individuals and 22,629 cases of CRC                                               | RR=0.98(0.90; 1.06)<br><br><b>Subgroup:</b><br>Women<br>RR=0.94(0.79; 1.17)<br>Men:<br>RR=1.01(0.88; 1.17)                                                                                                                               | Quality: NOS mean=7.6<br><br><b>Heterogeneity:</b><br>P=0.03; I <sup>2</sup> =41%<br><br><b>Publication bias:</b><br>Begg p=0.94<br>Egger p=0.76      |



| Study Country (Reference) | Search period and databases searched | Inclusions / exclusions | Intervention                                                         | Control      | Outcomes        | Results*                                                                                                                                                                                                                                                                                                                                                                                                                                                                                              | Quality score Heterogeneity Publication bias                                                                                                                                    |
|---------------------------|--------------------------------------|-------------------------|----------------------------------------------------------------------|--------------|-----------------|-------------------------------------------------------------------------------------------------------------------------------------------------------------------------------------------------------------------------------------------------------------------------------------------------------------------------------------------------------------------------------------------------------------------------------------------------------------------------------------------------------|---------------------------------------------------------------------------------------------------------------------------------------------------------------------------------|
|                           |                                      |                         |                                                                      |              | FU: 4.5 to 18 y |                                                                                                                                                                                                                                                                                                                                                                                                                                                                                                       |                                                                                                                                                                                 |
|                           |                                      |                         | Coffee<br>Dose response<br>Incremental of the number cups/day (cp/d) | Non drinkers | CRC             | <p><b>Dose response</b><br/>incremental of 4 cp/d<br/>RR=0.97(0.92; 1.03)</p> <p><b>Cubic spline model</b><br/>Incremental of 1cp/d<br/>RR= 1.00(0.99;1.02)</p> <p>Incremental of 2cp/d<br/>RR=1.00(0.97; 1.04)</p> <p>Incremental of 3cp/d<br/>RR=1.00(0.96; 1.04)</p> <p>Incremental of 4cp/d<br/>RR=0.98(0.96; 1.03)</p> <p>Incremental of 5cp/d<br/>RR=0.96(0.91; 1.00)</p> <p>Incremental of 6cp/d<br/><b>RR=0.93(0.89; 0.99)</b></p> <p>Incremental of 7cp/d<br/><b>RR=0.90(0.85; 0.97)</b></p> | <p><b>Quality</b> : not specified for sub-group</p> <p><b>Heterogeneity:</b><br/>P=0.08; I<sup>2</sup>=34%</p> <p><b>Publication bias:</b><br/>Begg p=0.77<br/>Egger p=0.43</p> |

| Study Country (Reference)                       | Search period and databases searched | Inclusions / exclusions                                                                                                                                                                                                                                      | Intervention                                        | Control | Outcomes                  | Results*                                           | Quality score<br>Heterogeneity<br>Publication bias                                                                                                     |
|-------------------------------------------------|--------------------------------------|--------------------------------------------------------------------------------------------------------------------------------------------------------------------------------------------------------------------------------------------------------------|-----------------------------------------------------|---------|---------------------------|----------------------------------------------------|--------------------------------------------------------------------------------------------------------------------------------------------------------|
|                                                 |                                      |                                                                                                                                                                                                                                                              |                                                     |         |                           | Incremental of 8cp/d<br><b>RR=0.87(0.80; 0.95)</b> |                                                                                                                                                        |
|                                                 |                                      |                                                                                                                                                                                                                                                              |                                                     |         | Colon cancer incidence    | RR=0.92(0.83; 1.02)                                | <b>Quality</b> : not specified for sub-group<br><b>Heterogeneity:</b> P=0.12; I <sup>2</sup> =30%<br><b>Publication bias:</b> Begg p=0.62 Egger p=0.70 |
|                                                 |                                      |                                                                                                                                                                                                                                                              |                                                     |         | Rectal cancer incidence   | RR=1.06(0.95; 1.19)                                | <b>Quality</b> : not specified for sub-group<br><b>Heterogeneity:</b> P=0.31; I <sup>2</sup> =13%<br><b>Publication bias:</b> Begg p=1.00 Egger p=0.82 |
| <b>Vieira et al, 2017*</b><br><b>UK</b><br>[27] | <b>Up to May 2015</b>                | <b>Inclusion:</b> 1) RCT, Cohort or case-control design, 2) report adjusted estimates of the RR and 95% CIs for the association of foods and CRC incidence; 3) for dose–response meta-analysis, studies should provide a quantitative measure of the intake. | Coffee<br>Dose response<br>Incremental of 1 cup/day |         | CRC risk<br><br>14 Cohort | OR=1.00(0.99; 1.02)                                | <b>Quality:</b> “high quality”<br><b>Heterogeneity:</b> I <sup>2</sup> =44%, p=0.05<br><b>Publication bias</b> Egger’s p = 0.002                       |

| Study Country (Reference)                               | Search period and databases searched | Inclusions / exclusions                                                                                     | Intervention                               | Control                                   | Outcomes                            | Results*                                                                                                                                                                                                    | Quality score<br>Heterogeneity<br>Publication bias                                                                                |
|---------------------------------------------------------|--------------------------------------|-------------------------------------------------------------------------------------------------------------|--------------------------------------------|-------------------------------------------|-------------------------------------|-------------------------------------------------------------------------------------------------------------------------------------------------------------------------------------------------------------|-----------------------------------------------------------------------------------------------------------------------------------|
|                                                         |                                      |                                                                                                             |                                            |                                           | Colon cancer<br>11 Cohort           | OR=0.99(0.97; 1.01)                                                                                                                                                                                         | <b>Heterogeneity:</b><br>I <sup>2</sup> =49%, p=0.03<br><br><b>Publication bias:</b><br>Egger's: p=0.55                           |
|                                                         |                                      |                                                                                                             |                                            |                                           | Rectal cancer<br>15 Cohort          | OR=1.01(1.00; 1.03)                                                                                                                                                                                         | <b>Heterogeneity:</b><br>I <sup>2</sup> =2%, p=0.43<br><br><b>Publication bias:</b><br>Egger's p=0.73                             |
| <b>FISH AND OMEGA-3</b>                                 |                                      |                                                                                                             |                                            |                                           |                                     |                                                                                                                                                                                                             |                                                                                                                                   |
| <b>Geelen et al, 2007</b><br><b>Netherlands</b><br>[65] | <b>until January 2006</b>            | <b>Inclusions:</b> prospective Cohort studies on CRC with data on the exposures "fish" or "n-3 fatty acids" | Highest fish consumption (varying cut-off) | Lowest fish consumption (varying cut-off) | CRC incidence<br>14 Cohort          | RR=0.88(0.78; 1.00)<br><br>Dose-response:<br>1 time/week<br>RR=0.96(0.92; 1.00)<br>100g/week<br>RR=0.97(0.92; 1.03)<br><br><b>Subgroup:</b><br>Women:<br>RR=0.78(0.58; 1.06)<br>Men:<br>RR=0.94(0.75; 1.18) | No quality assessment<br><br><b>Heterogeneity:</b><br>P=0.25; I <sup>2</sup> =18%<br><br><b>Publication bias:</b><br>Egger p=0.66 |
|                                                         |                                      |                                                                                                             |                                            |                                           | Colon cancer incidence<br>8 Cohort  | RR=0.87(0.74; 1.02)                                                                                                                                                                                         | <b>Heterogeneity:</b><br>P=0.33; I <sup>2</sup> =13%                                                                              |
|                                                         |                                      |                                                                                                             |                                            |                                           | Rectal cancer incidence<br>4 Cohort | RR=0.84(0.55; 1.29)                                                                                                                                                                                         | <b>Heterogeneity:</b><br>P=0.04; I <sup>2</sup> =64%                                                                              |

| Study Country (Reference)                 | Search period and databases searched | Inclusions / exclusions                                                                                                                                                                                                                                                                                                                               | Intervention                                         | Control                                             | Outcomes                                                                                                                    | Results*                                                                                                                                                        | Quality score<br>Heterogeneity<br>Publication bias                                                                                                |
|-------------------------------------------|--------------------------------------|-------------------------------------------------------------------------------------------------------------------------------------------------------------------------------------------------------------------------------------------------------------------------------------------------------------------------------------------------------|------------------------------------------------------|-----------------------------------------------------|-----------------------------------------------------------------------------------------------------------------------------|-----------------------------------------------------------------------------------------------------------------------------------------------------------------|---------------------------------------------------------------------------------------------------------------------------------------------------|
| Huxley et al., 2009*<br>Australia<br>[34] | 1996-January 2008                    | <b>Inclusions:</b> 1) published quantitative estimates and standard errors (or some other measure of variability) of the association between each risk factor and 2) CRC<br><br><b>Exclusions:</b> 1) provided only an estimate of effect, with no means by which to calculate the standard error, or if the estimates were not at least age adjusted | Highest fish consumption (varying cut-off)           | Lowest fish consumption (varying cut-off)           | CRC risk<br><br>Unk for fish<br><br>5,317 Cases                                                                             | RR=0.93(0.84; 1.04)                                                                                                                                             | No quality assessment<br><br><b>Heterogeneity:</b><br>P=0.25; I <sup>2</sup> =18%<br><br><b>Publication bias:</b><br>Egger p=0.66                 |
| Shen et al., 2012<br>China<br>[67]        | up to February 2012                  | <b>Inclusions:</b> prospective Cohort design; the exposure of interest was dietary n-3 fatty acids; the out- come of interest was incidence of colorectal, colon or rectal cancer; risk estimates and associated 95 % CI (or data to calculate them) were provided.                                                                                   | Highest n-3 fatty acid consumption (varying cut-off) | Lowest n-3 fatty acid consumption (varying cut-off) | CRC risk<br><br>7Co<br>4,656 cases/489, 465 patients<br><br>FU: 6-22 yrs<br><br>Colon cancer risk<br><br>Rectal cancer risk | RR=0.97(0.86; 1.10)<br><br><u>Subgroup:</u><br>Women<br>RR=1.07(0.91; 1.26)<br>Men<br>RR=0.87(0.75; 1.00)<br><br>RR=0.85(0.72; 1.01)<br><br>RR=1.13(0.89; 1.44) | Quality not reported<br><br><b>Heterogeneity:</b><br>P=0.09; I <sup>2</sup> =38%<br><br><b>Publication bias:</b><br>Egger p=0.66<br>Begg p = 0.76 |
| Wu et al., 2012<br>China<br>[66]          | Up to May 2012                       | <b>Inclusion:</b> 1) Cohort or case-control study design, 2) exposure of interest was fresh fish consumption, 3) number of CRC cases and controls had to be reported, 4) RRs or ORs with their corresponding 95% CI for highest versus non/lowest level of fish intake had to be reported.                                                            | Fish consumers (varying cut-off)                     | non/lowest consumers (varying cut-off)              | CRC risk<br>22Co; 19 case-control                                                                                           | <b>RR=0.87(0.80; 0.95)</b>                                                                                                                                      | Quality not reported<br><br><b>Heterogeneity:</b><br>P<0.01<br><br>No publication bias                                                            |

| Study Country (Reference)          | Search period and databases searched | Inclusions / exclusions                                                                                                                                                                           | Intervention                     | Control                                | Outcomes                                                | Results*                                                                       | Quality score<br>Heterogeneity<br>Publication bias                                                                                                                                    |
|------------------------------------|--------------------------------------|---------------------------------------------------------------------------------------------------------------------------------------------------------------------------------------------------|----------------------------------|----------------------------------------|---------------------------------------------------------|--------------------------------------------------------------------------------|---------------------------------------------------------------------------------------------------------------------------------------------------------------------------------------|
|                                    |                                      |                                                                                                                                                                                                   |                                  |                                        | Colon cancer risk<br>14 Cohort or case-control          | RR=0.96(0.81; 1.14)                                                            | Quality not reported<br><br><b>Heterogeneity:</b><br>P<0.01<br><br>No publication bias                                                                                                |
|                                    |                                      |                                                                                                                                                                                                   |                                  |                                        | Rectal cancer risk<br>7 Cohort or case-control          | <b>RR=0.79(0.65; 0.97)</b>                                                     | Quality not reported<br><br><b>Heterogeneity:</b><br>P=0.03<br><br>No publication bias                                                                                                |
| Pham et al., 2013<br>Japan<br>[68] | Up to November 2012                  | <b>Inclusions:</b> Only studies on Japanese populations living in Japan were included                                                                                                             | Fish consumers (varying cut-off) | Lowest consumers (varying cut-off)     | CRC incidence                                           | Cohort:<br>OR=1.03(0.89; 1.18)<br>case-control:<br><b>OR=0.84(0.75; 0.94)</b>  | Quality not reported<br><br><b>Heterogeneity:</b><br>Cohort: P=0.99;<br>I <sup>2</sup> =0%<br>case-control:<br>P=0.60; I <sup>2</sup> =0%<br><br><b>Publication bias not reported</b> |
|                                    |                                      |                                                                                                                                                                                                   |                                  |                                        | Colon cancer                                            | Cohort:<br>OR=0.96(0.77; 1.21)<br>case-control:<br><b>OR=0.84(0.73; 0.98)</b>  |                                                                                                                                                                                       |
|                                    |                                      |                                                                                                                                                                                                   |                                  |                                        | Rectal cancer                                           | Cohort:<br>OR=0.96(0.77; 1.21)<br>case-control:<br><b>OR=0.83(0.70; 0.99)</b>  |                                                                                                                                                                                       |
| Yu et al., 2014<br>China<br>[69]   | 1945-May 2013                        | <b>Inclusions:</b> 1) prospective Cohort design; 2) reported RRs or HRs and corresponding 95% CIs (or data to calculate them) of GI cancer relating to different levels of fresh fish intake; and | Fish consumers (varying cut-off) | non/lowest consumers (varying cut-off) | CRC risk<br><br>20 Cohort<br>14,097 cases/<br>1,633,066 | <b>RR=0.93(0.87; 0.99)</b><br><br>Incremental estimates for<br>20g/day of fish | Quality not reported<br><br><b>Heterogeneity:</b><br>Cohort: P<0.01;                                                                                                                  |

| Study Country (Reference)                       | Search period and databases searched | Inclusions / exclusions                                                                                                                                                                                                  | Intervention                             | Control                                | Outcomes                                              | Results*                           | Quality score<br>Heterogeneity<br>Publication bias                                          |
|-------------------------------------------------|--------------------------------------|--------------------------------------------------------------------------------------------------------------------------------------------------------------------------------------------------------------------------|------------------------------------------|----------------------------------------|-------------------------------------------------------|------------------------------------|---------------------------------------------------------------------------------------------|
|                                                 |                                      | 3) included the frequency of fish consumption                                                                                                                                                                            |                                          |                                        | controls<br>Average FU:<br>13.6 years                 | consumption:<br>RR=0.99(0.97-1.01) | I <sup>2</sup> =65%<br><br><b>No publication bias</b>                                       |
|                                                 |                                      |                                                                                                                                                                                                                          |                                          |                                        | Colon cancer risk<br><br>12 Cohort                    | <b>RR=0.95(0.91; 0.98)</b>         | Quality not reported<br><br><b>Heterogeneity:</b><br>Cohort: P=0.16;<br>I <sup>2</sup> =34% |
|                                                 |                                      |                                                                                                                                                                                                                          |                                          |                                        | Rectal cancer risk<br><br>8Co                         | <b>RR=0.85(0.75; 0.95)</b>         | Quality not reported<br><br><b>Heterogeneity:</b><br>Cohort: P=0.02;<br>I <sup>2</sup> =58% |
|                                                 |                                      |                                                                                                                                                                                                                          | Low fish consumption (varying cut-off)   | non/lowest consumers (varying cut-off) | CRC risk                                              | RR=0.95(0.92; 1.02)                | Quality not reported<br><br><b>Heterogeneity:</b><br>Cohort: P=0.83;<br>I <sup>2</sup> =0%  |
|                                                 |                                      |                                                                                                                                                                                                                          | High fish consumption (varying cut-off)  | non/lowest consumers (varying cut-off) | CRC risk                                              | <b>RR=0.91(0.82; 0.99)</b>         | Quality not reported<br><br><b>Heterogeneity:</b><br>Cohort: P=0.00;<br>I <sup>2</sup> =66% |
| <b>Vieira et al, 2017*</b><br><b>UK</b><br>[27] | <b>Up to May 2015</b>                | <b>Inclusion:</b> 1) RCT, Cohort or case-control design, 2) report adjusted estimates of the RR and 95% CIs for the association of foods and CRC incidence; 3) for dose-response meta-analysis, studies should provide a | Dose response<br>Incremental of 100g/day |                                        | CRC risk<br>11 Cohort or case-control<br>10,356 cases | <b>RR=0.89(0.80; 0.99)</b>         | Quality not reported<br><br><b>Heterogeneity:</b><br>p=0.52; I <sup>2</sup> =0%             |

| Study Country (Reference)                | Search period and databases searched                       | Inclusions / exclusions                                                                                                                                                                                                                                                                                                                                                                                                  | Intervention                                  | Control                    | Outcomes                                        | Results*            | Quality score Heterogeneity Publication bias                                                                       |
|------------------------------------------|------------------------------------------------------------|--------------------------------------------------------------------------------------------------------------------------------------------------------------------------------------------------------------------------------------------------------------------------------------------------------------------------------------------------------------------------------------------------------------------------|-----------------------------------------------|----------------------------|-------------------------------------------------|---------------------|--------------------------------------------------------------------------------------------------------------------|
|                                          |                                                            | quantitative measure of the intake.                                                                                                                                                                                                                                                                                                                                                                                      |                                               |                            |                                                 |                     | <b>Publication bias:</b><br>Egger's p=0.27                                                                         |
|                                          |                                                            |                                                                                                                                                                                                                                                                                                                                                                                                                          |                                               |                            | Colon cancer risk<br>11 Cohort or case-control  | RR=0.91(0.80; 1.03) | <b>Heterogeneity:</b><br>Cohort: P=0.76;<br>I <sup>2</sup> =0%<br><b>Publication bias:</b><br>Egger's p=0.32       |
|                                          |                                                            |                                                                                                                                                                                                                                                                                                                                                                                                                          |                                               |                            | Rectal cancer risk<br>10 Cohort or case-control | RR=0.84(0.69; 1.02) | <b>Heterogeneity:</b><br>Cohort: P=0.31;<br>I <sup>2</sup> =15%<br><b>Publication bias:</b><br>Egger's p=0.56      |
| <b>CALCIUM</b>                           |                                                            |                                                                                                                                                                                                                                                                                                                                                                                                                          |                                               |                            |                                                 |                     |                                                                                                                    |
| Weingarten et al. 2008<br>Israel<br>[71] | Up to Dec 2009<br><br>Cochrane, MEDLINE, Cancerlit, Embase | <b>Inclusions:</b> 1) Supplementation with Ca salts in doses above 1200 mg elemental Ca per day, 2) duration of intervention longer than 6 months<br><br><b>Exclusions:</b> 1) combined interventions in which there was no arm testing for Ca supplementation alone, observational studies, 2) data from familial polyposis coli<br><br><b>Population:</b> healthy adults, adults at higher risk of colon cancer due to | Ca salts 1200 mg and 2000mg per day, ≥6months | placebo or no intervention | CRC incidence<br><br>2 RCT<br>N=1,346 subjects  | OR=0.34(0.05;2.15)  | Quality not reported<br><br>Heterogeneity:<br>I <sup>2</sup> = 0%, p=0.99<br><br>Publication bias:<br>Not reported |

| Study Country (Reference)             | Search period and databases searched                                                          | Inclusions / exclusions                                                                                                                                                                                                                                                                                                                                                                                                                                                                                                                                                           | Intervention                                                                             | Control                                 | Outcomes                                                                                                                   | Results*                                                                          | Quality score Heterogeneity Publication bias                                                                       |
|---------------------------------------|-----------------------------------------------------------------------------------------------|-----------------------------------------------------------------------------------------------------------------------------------------------------------------------------------------------------------------------------------------------------------------------------------------------------------------------------------------------------------------------------------------------------------------------------------------------------------------------------------------------------------------------------------------------------------------------------------|------------------------------------------------------------------------------------------|-----------------------------------------|----------------------------------------------------------------------------------------------------------------------------|-----------------------------------------------------------------------------------|--------------------------------------------------------------------------------------------------------------------|
|                                       |                                                                                               | family history, previous adenomatous polyps, or inflammatory bowel disease are considered.                                                                                                                                                                                                                                                                                                                                                                                                                                                                                        |                                                                                          |                                         |                                                                                                                            |                                                                                   |                                                                                                                    |
| Huncharek et al., 2009 USA [73]       | Jan1966-Feb 2007 (MEDLARS) Jan 1966-Feb 2003 (Cochrane) MEDLARS, CancerLit, Cochrane database | <b>Inclusions:</b> 1) observational studies 2) patients with histologically proven adenocarcinoma of colon/rectum, 3) availability of data on exposures of interest including dairy products, dietary Ca, and/or vit D intake, 4) availability of ORs or RRs with 95% CIs for each report or availability of raw data to calculate these parameters; and availability of data on outcome of interest including incident CRC<br><b>Exclusions:</b> 1) animal studies, 2) in vitro studies, 3) review articles, letters to the editor, 4) abstracts, and non-peer-reviewed articles | Ca supplement (dose threshold varies within studies; $\geq 500$ mg/d to $\geq 700$ mg/d) | No Ca supplement dose (<700mg to 0mg/d) | CRC incidence<br>5 Cohort<br>N=unk                                                                                         | <b>RR=0.76(0.65;0.89)</b>                                                         | Quality not reported<br>Heterogeneity: P=0.23<br>Publication bias: None reported                                   |
| Bristow et al., 2013 New Zealand [72] | 1966-2012<br>Medline, Embase, Cochrane Central                                                | <b>Inclusion:</b> 1) RCT, 2) dose $\geq 500$ mg/d of elemental Ca was administered, $\geq 100$ participants randomised; participants of either sex were studied; and the duration of the trial was >1 year<br><b>Exclusions:</b> 1) cohort-administration of Ca and vit D and compared with placebo (studies were eligible if vit D was given to both intervention and control groups), 2) administered in the form of a complex nutritional supplement or as a dietary modification, 3) participants had a major systemic disease other than osteoporosis or colorectal adenoma. | Ca supplements $\geq 500$ mg/d                                                           | Placebo                                 | CRC incidence<br>7 RCTs<br>n=10,496<br>FU : 3,9yrs<br><br>Study level,<br>4 RCT<br>patient level<br>n=7221, FU :<br>3.5yrs | Study level:<br>RR=1.38(0.89;2.15)<br>Patient level<br><b>HR=1.63 (1.01;2.64)</b> | Quality not reported<br>Heterogeneity: I <sup>2</sup> = 0%,<br>Publication bias: no indication of publication bias |



| Study Country (Reference)        | Search period and databases searched                                                               | Inclusions / exclusions                                                                                                                                                                                                                                                                                                                                                                                                       | Intervention            | Control                 | Outcomes                                              | Results*                                                                                                   | Quality score Heterogeneity Publication bias                                                                             |
|----------------------------------|----------------------------------------------------------------------------------------------------|-------------------------------------------------------------------------------------------------------------------------------------------------------------------------------------------------------------------------------------------------------------------------------------------------------------------------------------------------------------------------------------------------------------------------------|-------------------------|-------------------------|-------------------------------------------------------|------------------------------------------------------------------------------------------------------------|--------------------------------------------------------------------------------------------------------------------------|
| Keum et al., 2014 USA [74]       | January 1966-Feb 2007 (MEDLARS) Jan 1966-Feb 2003 (Cochrane) MEDLARS, CancerLit, Cochrane database | <b>Inclusions:</b> 1) prospective observational study (Cohort studies analyzed with nested case-control, case-cohort, or prospective cohort approaches)<br><b>Exclusions:</b> 1) retrospective studies, 2) non English-language                                                                                                                                                                                               | 300 mg/day increase.    | Dose response           | CRC risk / Dose response<br><br>5 Cohort<br>N=920,837 | <b>RR=0.91(0.86;0.98)</b>                                                                                  | Quality not reported<br><br>Heterogeneity: I <sup>2</sup> = 67%, p=0.01<br><br>Publication bias: Egger =0.43, Begg =0.85 |
| Heine-Bröring et al., 2015* [22] | Up to January 2013<br><br>Medline, Embase and Cochrane                                             | <b>Inclusions:</b> prospective cohort studies if they reported original and peer-reviewed data on the association of dietary supplement use and colorectal, colon, or rectal cancer incidence. To be included in the meta-analyses, information on ascertainment of colorectal cancer cases, and estimates of the RR 95% CI were required<br><b>Exclusions:</b> studies on colorectal adenomas, RCTs and case-control studies | Ca                      | No intake               | <b>CRC incidence</b><br>8 Cohort<br>N=unk             | <b>RR=0.86(0.79;0.95)</b>                                                                                  | Quality performed: none<br><br>Heterogeneity: I <sup>2</sup> =64%; p=0.01<br><br>Publication bias: not reported          |
|                                  |                                                                                                    |                                                                                                                                                                                                                                                                                                                                                                                                                               | Ca increase of 100 mg/d | Control                 | <b>CRC incidence</b><br>6 Cohort<br>N=unk             | <b>RR=0.96(0.94;0.99)</b><br><br>Subgroup:<br>Female:<br>RR=0.97(0.94;1.00)<br>Male:<br>RR=0.95(0.95;1.02) | Heterogeneity: I <sup>2</sup> =0.77; p<0.01                                                                              |
| <b>VITAMIN A</b>                 |                                                                                                    |                                                                                                                                                                                                                                                                                                                                                                                                                               |                         |                         |                                                       |                                                                                                            |                                                                                                                          |
| Liu et al., 2015 China           | Up to April 2014                                                                                   | <b>Inclusions:</b> 1) Co studies, 2) the exposure of interest was vitamin or                                                                                                                                                                                                                                                                                                                                                  | highest level vitamin   | Lowest level of vitamin | CRC incidence                                         | Vit A:<br>RR=0.87(0.75;1.03)                                                                               | Quality performed:                                                                                                       |

| Study Country (Reference)              | Search period and databases searched                   | Inclusions / exclusions                                                                                                                                                                                                                                                                                                                                                                                                               | Intervention                                                               | Control                                                                   | Outcomes                                                                                                          | Results*                             | Quality score Heterogeneity Publication bias                                                                          |
|----------------------------------------|--------------------------------------------------------|---------------------------------------------------------------------------------------------------------------------------------------------------------------------------------------------------------------------------------------------------------------------------------------------------------------------------------------------------------------------------------------------------------------------------------------|----------------------------------------------------------------------------|---------------------------------------------------------------------------|-------------------------------------------------------------------------------------------------------------------|--------------------------------------|-----------------------------------------------------------------------------------------------------------------------|
| [23]                                   | Pubmed                                                 | multiple-vitamin supplement intake, 3) the outcome of interest was the incidence of colorectal, colon, or rectal cancer, 4) RR or OR estimates with 95% CI were reported;<br><br><b>Exclusions:</b> Articles with <6 stars                                                                                                                                                                                                            |                                                                            |                                                                           | 9 Co for Vit A<br><br>N=unk<br><br>median 10,000UI/d                                                              |                                      | NOS (6-8 stars)<br><br>Heterogeneity: Vit A: I <sup>2</sup> = 0%;<br><br>Publication bias: Vit A: p=unk               |
| Heine-Bröring et al., 2015 [22]        | Up to January 2013<br><br>Medline, Embase and Cochrane | <b>Inclusions:</b> prospective Cohort studies if they reported original and peer-reviewed data on the association of dietary supplement use and colorectal, colon, or rectal cancer incidence. To be included in the meta-analyses, information on ascertainment of colorectal cancer cases, and estimates of the RR with 95% CI were required<br><br><b>Exclusions:</b> studies on colorectal adenomas, RCT and case-control studies | Intake of multivitamins, Vit A, Vit C, Vit E, Vit D, Calcium* and Garlic.  | No intake                                                                 | <b>Colon cancer incidence</b><br>2Co for Vit A<br>0 vs >5000 and <5000<br><br>0 Vs<br>10000/day (at least 1/week) | Vit A :<br><b>RR=0.77(0.62;0.94)</b> | Quality performed: none<br><br>Heterogeneity: Vit A: I <sup>2</sup> =0%; p=0.76<br><br>Publication bias: not reported |
|                                        |                                                        |                                                                                                                                                                                                                                                                                                                                                                                                                                       | Highest level of multivitamins, Vit A, Vit C, Vit E, Vit D, Ca and Garlic. | Lowest level of multivitamins, Vit A, Vit C, Vit E, Vit D, Ca and Garlic. | <b>Colon cancer incidence</b><br>2 Cohort for Vit A                                                               | Vit A:<br>RR=0.79(0.62;1.01)         | Quality performed: none<br><br>Heterogeneity: Vit A: I <sup>2</sup> =0%; p=0.97<br><br>Publication bias: not reported |
| <b>VITAMIN B (FOLIC ACID EXCLUDED)</b> |                                                        |                                                                                                                                                                                                                                                                                                                                                                                                                                       |                                                                            |                                                                           |                                                                                                                   |                                      |                                                                                                                       |
| Liu et al., 2015 China [23]            | Up to April 2014                                       | <b>Inclusions:</b> 1) Cohort studies, 2) the exposure of interest was vitamin or multiple-vitamin supplement intake, 3)                                                                                                                                                                                                                                                                                                               | highest level vitamin                                                      | Lowest level of vitamin                                                   | CRC incidence                                                                                                     | Vit B2:<br><b>RR=0.86(0.76;0.97)</b> | Quality performed: NOS                                                                                                |

| Study Country (Reference)        | Search period and databases searched    | Inclusions / exclusions                                                                                                                                                                                                                                      | Intervention                                                                                                                                    | Control                    | Outcomes                                                                                                 | Results*                                                                                                        | Quality score Heterogeneity Publication bias                                                                                                                                                                                                      |
|----------------------------------|-----------------------------------------|--------------------------------------------------------------------------------------------------------------------------------------------------------------------------------------------------------------------------------------------------------------|-------------------------------------------------------------------------------------------------------------------------------------------------|----------------------------|----------------------------------------------------------------------------------------------------------|-----------------------------------------------------------------------------------------------------------------|---------------------------------------------------------------------------------------------------------------------------------------------------------------------------------------------------------------------------------------------------|
|                                  | Pubmed                                  | the outcome of interest was the incidence of colorectal, colon, or rectal cancer , 4) RR or OR estimates with 95 % CI were reported;<br><br><b>Exclusions:</b> Articles with <6 stars                                                                        |                                                                                                                                                 |                            | 5 Cohort for Vit B2<br>2 Cohort for Vit B3<br>17 Cohort for Vit B6<br>12 Cohort for Vit B12<br><br>N=unk | Vit B3:<br>RR=1.18(0.76;1.84)<br><br>Vit B6:<br><b>RR=0.88(0.79;0.99)</b><br><br>Vit B12:<br>RR=1.10(0.92;1.32) | Heterogeneity:<br>Vit B2: I <sup>2</sup> = 0%;<br>Vit B3: I <sup>2</sup> = 31%;<br>Vit B12: I <sup>2</sup> = 49%;<br>Vit B6: I <sup>2</sup> = 41%;<br><br>Publication bias:<br>Vit B2: p=unk<br>Vit B3: p=unk<br>Vit B6: p=0.51<br>Vit B12: p=unk |
| Larsson et al., 2010 Sweden [70] | up to Feb 2010<br><br>Medline<br>Embase | <b>Inclusions:</b> 1) prospective design 2) exposure of interest was intake of vitamin B6 or blood levels of PLP 3) the outcome of interest was colorectal, colon or rectal cancer, and 4) RR estimates with 95%CI or data to calculate these were reported. | dietary vit B6 <Q1 (min 1.02/day) >Q5 max 4.36mg/day. Dietary only except 2 studies dietary and supplements together but none supplements alone | highest vs lowest category | CRC incidence<br><br>8 Cohort and 1 nested case-control                                                  | Pooled<br>RR=0.90(0.75 ;1.07)<br><br>Colon<br>RR=0.97(0.81;1.18)                                                | Quality performed NOS<br><br>Publication bias No evidence<br><br>Heterogeneity I <sup>2</sup> = 56.2% (95% CI, 0%-76%) P=0.01<br><br>Sensitivity I <sup>2</sup> =24%, p=0.23                                                                      |
| <b>STATINS</b>                   |                                         |                                                                                                                                                                                                                                                              |                                                                                                                                                 |                            |                                                                                                          |                                                                                                                 |                                                                                                                                                                                                                                                   |
| Bardou et al., 2010 France [76]  | Last 10 years up to September 2009.     | <b>Inclusion:</b> 1) RCT, case-control and Cohort, 2) assessed or reported colorectal, digestive, gastrointestinal, colon and rectal cancer prevalence in subjects taking, or not taking, statins,                                                           | Highest level of Ca                                                                                                                             | Lowest level of Ca         | <b>CRC incidence</b><br>6 Cohort<br>N=unk                                                                | <b>RR=0.80(0.70;0.92)</b>                                                                                       | Quality performed: none<br><br>Heterogeneity: I <sup>2</sup> =49%; p=0.08                                                                                                                                                                         |

| Study Country (Reference)        | Search period and databases searched                            | Inclusions / exclusions                                                                                                                                                                                                                                                                                                                                                                                                                                                                                                                                                                                          | Intervention                           | Control                 | Outcomes                                                                                                                                              | Results*                                                                                                                                                                                                                    | Quality score Heterogeneity Publication bias                                                                                                                                                                                                          |
|----------------------------------|-----------------------------------------------------------------|------------------------------------------------------------------------------------------------------------------------------------------------------------------------------------------------------------------------------------------------------------------------------------------------------------------------------------------------------------------------------------------------------------------------------------------------------------------------------------------------------------------------------------------------------------------------------------------------------------------|----------------------------------------|-------------------------|-------------------------------------------------------------------------------------------------------------------------------------------------------|-----------------------------------------------------------------------------------------------------------------------------------------------------------------------------------------------------------------------------|-------------------------------------------------------------------------------------------------------------------------------------------------------------------------------------------------------------------------------------------------------|
|                                  | EMBASE, MEDLINE, CENTRAL and ISI Web of knowledge               | 3) articles that contained sufficient detail to reconstruct 2x2 tables<br><b>Exclusions:</b> 1) not published in English or French, 2) without specific cancer site assessment, 3) not assessing digestive tract cancers 4) studies included from the same author                                                                                                                                                                                                                                                                                                                                                |                                        |                         |                                                                                                                                                       |                                                                                                                                                                                                                             | Publication bias: not reported                                                                                                                                                                                                                        |
| Bonovas et al., 2007 Greece [78] | Up to December 2006<br><br>Medline, Web of science              | <b>Inclusion:</b> 1) RCT, case-control and Cohort, 2) evaluated exposure to statins and risk of colorectal cancer. RCTs were considered eligible if they evaluated 1) statin therapy compared with placebo or no treatment, 2) no other intervention difference between the experimental and the control group, 3) enrolled at least 2,000 participants, 4) minimum duration of 3 years, 5) reported CRC incidence during the trial.<br><b>Exclusions:</b> 1) insufficient published data for determining an estimate of relative risk (RR) and a CI.<br><br>Only data from the most recent report were included | Statin<br>Duration>3yrs                | Placebo or usual care   | CRC incidence<br>6 RCT, 9CC, 3Co<br><br>N=55 113 from RCT, 325 000 person-year. N>1.5million from case-control and Cohort of whom 38 124 cancer cases | RCT:<br>RR=0.95(0.81; 1.11), fixed-effects model<br>RR=0.95(0.80; 1.13), random-effects model<br><b>case-control and Cohort:<br/>RR=0.92(0.88; 0.96), random-effects model<br/>RR=0.92(0.90; 0.95), fixed-effects model</b> | Quality not reported<br><br>Heterogeneity:<br>RCT: I <sup>2</sup> = 9%, p=0.36<br>case-control and Cohort: I <sup>2</sup> = 16%, p=0.29<br><br>Publication bias:<br>RCT: Begg's and Egger's test: p=0.99 and p=0.88<br>Obs : Begg=0.24 and Egger=0.36 |
| Browning et al., 2007 UK [79]    | Up to November 2005<br><br>MEDLINE, EMBASE, Web of Science, ISI | <b>Inclusions:</b> 1) RCT, case-control and Cohort 2) measured all-cancer or site-specific cancer incidence or fatality associated with statins. 3) A measure of the strength of the association must have been stated in the form of RR or OR, or could be calculated from the raw data presented in the article, 4)                                                                                                                                                                                                                                                                                            | Statin<br><br>Min FU: 3.6 RCT, 6.2 yrs | Placebo or no treatment | CRC incidence<br>9 RCT, 3 case-control, 2 Cohort<br><br>N=103,573                                                                                     | RCT:<br>RR=1.02 (0.89; 1.16)<br><br>case-control and Cohort:<br>RR=0.84 (0.59; 1.21) Random-                                                                                                                                | Quality not reported<br><br>Heterogeneity:<br>RCT I <sup>2</sup> =0%<br>case-control and Cohort: I <sup>2</sup> =89%                                                                                                                                  |

| Study Country (Reference)           | Search period and databases searched                                                            | Inclusions / exclusions                                                                                                                                                                                                                                                                                                                                      | Intervention                                      | Control                 | Outcomes                                                                                                        | Results*                                                                                             | Quality score Heterogeneity Publication bias                                                                            |
|-------------------------------------|-------------------------------------------------------------------------------------------------|--------------------------------------------------------------------------------------------------------------------------------------------------------------------------------------------------------------------------------------------------------------------------------------------------------------------------------------------------------------|---------------------------------------------------|-------------------------|-----------------------------------------------------------------------------------------------------------------|------------------------------------------------------------------------------------------------------|-------------------------------------------------------------------------------------------------------------------------|
|                                     | Proceedings and BIOSIS Previews                                                                 | statins compared to placebo, 5) observational studies if they compared statins vs. no statins.<br><br><b>Exclusions:</b> 1) Observational studies that only compared statin use with other lipid lowering agents 2) only highly specific populations, such as renal transplant patients and those with familial hypercholesterolaemia, 3) full-text articles |                                                   |                         | for RCT for all cancer outcome 826,854 for case-control and Cohort for all cancer outcomes (unk for colorectal) | effects model<br><b>RR=0.86(0.77; 0.96)</b>                                                          | Publication bias: Observational: Egger's test, p=0.8                                                                    |
| Dale et al., 2006 USA [75]          | up to July 2005<br><br>Medline, EMBASE, CINAHL, Web of Science, CANCELIT, the cochrane database | <b>Inclusions:</b> 1) RCT 2) statin compared to placebo- or routine treatment, 3) mean (or median) duration of patient follow-up of at least 1 year, 4) enroll a minimum of 100 patients, and 5) report data on the incidence of either cancer diagnosis or cancer death<br><br><b>Exclusions:</b> not specified                                             | Statin<br><br>Duration >1yr                       | Placebo                 | Colon cancer incidence<br>4 RCTs<br><br>N=27,972                                                                | RCT:<br>OR=0.95(0.73; 1.25)                                                                          | Quality not reported<br><br>Heterogeneity: RCT p= 0.24<br><br>Publication bias: Not reported for colon cancer           |
| Kuoppala et al., 2008* Finland [80] | up to October 2007<br><br>MEDLINE, EMBASE and Cochrane CENTRAL                                  | <b>Inclusions:</b> original study comparing statin treatment with an inactive control (placebo or no statins), adult study participants (18 years or older), cancer incidence reported, and follow-up over 1 year<br><br><b>Exclusions:</b> Studies on cerivastatin and those describing statin treatment in cancer or transplant patients                   | Statin                                            | Control                 | Colon cancer incidence<br><br>13 RCT, case-control or Cohort<br>N=31,272                                        | Colorectal<br>RR=0.74(0.47; 1.20)<br>Colon<br>RR=1.00(0.61; 1.70)<br>Rectum:<br>RR=1.10 (0.45; 2.50) | Quality and evidence reported<br><br>Heterogeneity: Not reported<br><br>Publication bias: Not reported for colon cancer |
| Liu et al. 2014 China [81]          | Up to July 30, 2013<br><br>PubMed,                                                              | <b>Inclusions:</b> 1) RCT, case-control and Cohort, 2) original studies evaluated exposure to statins and risk of CRC; 3) provided RR estimate (risk ratio, rate                                                                                                                                                                                             | Statin (Long term use and type of statin subgroup | Placebo or no treatment | Colon cancer incidence<br>11 RCT, 18 case-control,                                                              | Overall:<br><b>RR=0.90 (0.86; 0.95)</b> Random-effects model                                         | Quality not reported<br><br>Heterogeneity:                                                                              |

| Study Country (Reference)          | Search period and databases searched         | Inclusions / exclusions                                                                                                                                                                                                                                                                                                                                                                                                             | Intervention | Control                 | Outcomes                                                                                                        | Results*                                                                                                                                                                                                                                                                                                                                                       | Quality score Heterogeneity Publication bias                                                                                                                                                                                                                                  |
|------------------------------------|----------------------------------------------|-------------------------------------------------------------------------------------------------------------------------------------------------------------------------------------------------------------------------------------------------------------------------------------------------------------------------------------------------------------------------------------------------------------------------------------|--------------|-------------------------|-----------------------------------------------------------------------------------------------------------------|----------------------------------------------------------------------------------------------------------------------------------------------------------------------------------------------------------------------------------------------------------------------------------------------------------------------------------------------------------------|-------------------------------------------------------------------------------------------------------------------------------------------------------------------------------------------------------------------------------------------------------------------------------|
|                                    | Embase, Web of Science, and Cochrane library | ratio, HR, or OR) with the corresponding 95 % CIs or sufficient data to calculate them; 4) full-text articles<br><br><b>Exclusions:</b> (1) did not fulfill the inclusion criteria; (2) reviews, letters, editorials, conference abstracts, or case reports; 3) animal trials.                                                                                                                                                      | analysis)    |                         | 13 Cohort<br><br>N=95,984 for RCT<br>7,812,690 for case-control and Cohort                                      | Long term > 5years<br>RR=0.96(0.90; 1.03)<br><br>RCT:<br>RR=0.96(0.85; 1.08)<br>Random-effects model<br>RR=0.94 (0.86; 1.04)<br>fixed-effects models<br><br><b>case-control and Cohort:<br/>RR=0.89 (0.84; 0.95)</b><br>case-control:<br><b>RR=0.84(0.76; 0.93)</b><br>Cohort:<br><b>RR=0.93(0.87; 0.99)</b><br><br><b>Lipophilic<br/>RR=0.88 (0.85; 0.93)</b> | Overall: I <sup>2</sup> =67%; p <0.01<br>RCT: I <sup>2</sup> =22%; p=0.24<br>case-control and Cohort: I <sup>2</sup> =73%; p < 0.01<br>case-control: I <sup>2</sup> =78%; p<0.01<br>Cohort: I <sup>2</sup> =62%; p<0.01<br><br>Publication bias:<br>Begg= 0.42,<br>Egger 0.11 |
| Lytras et al., 2014<br>Greece [82] | Up to July 2013<br><br>MEDLINE               | <b>Inclusions:</b> 1) RCT, case-control and Cohort, 2) reported estimated measure of effect size (risk ratio, rate ratio, HR or OR) and its associated CI, or had to provide enough data to calculate such an effect measure and CI<br>RCTs were considered eligible if 1) statin was compared with placebo or no treatment; 2) had no other intervention difference between the experimental and the control group; 3) enrolled at | Statin       | Placebo or no treatment | Colon cancer risk<br>8 RCT, 19 case-control, 13 Cohort<br><br>N Overall >8,2M : 77,994 for RCT, 1.3M for and 7M | Overall:<br><b>RR=0.91 (0.87; 0.96)</b><br>Random-effects model<br><b>RR=0.94 (0.92; 0.96)</b><br>fixed-effects models<br><br>RCT:<br>RR=0.89 (0.74;                                                                                                                                                                                                           | Quality not reported<br><br>Heterogeneity:<br>Overall: I <sup>2</sup> =71%, p<0.01<br>RCT: I <sup>2</sup> =25%, p=0.23,<br>Obs I <sup>2</sup> =75%<br>p<0.01,<br>Cohort: I <sup>2</sup> =83%                                                                                  |

| Study Country (Reference)    | Search period and databases searched | Inclusions / exclusions                                                                                                                                                                       | Intervention | Control         | Outcomes                        | Results*                                                                                                                                                                                                                                                                                                                                                                                                                                                                                                | Quality score Heterogeneity Publication bias                                                                                                                                                                                                                                                                                |
|------------------------------|--------------------------------------|-----------------------------------------------------------------------------------------------------------------------------------------------------------------------------------------------|--------------|-----------------|---------------------------------|---------------------------------------------------------------------------------------------------------------------------------------------------------------------------------------------------------------------------------------------------------------------------------------------------------------------------------------------------------------------------------------------------------------------------------------------------------------------------------------------------------|-----------------------------------------------------------------------------------------------------------------------------------------------------------------------------------------------------------------------------------------------------------------------------------------------------------------------------|
|                              |                                      | <p>least 2000 participants; 4) had a minimum duration of 2 years; and 5) reported the incidence of colorectal cancer in both arms during the trial period.</p> <p><b>Exclusions:</b> none</p> |              |                 | for Cohort                      | <p>1.07)<br/>Random-effects model<br/>RR=0.90 (0.78; 1.04)<br/>fixed-effects models</p> <p>case-control and Cohort:<br/><b>RR=0.92 (0.87; 0.96)</b><br/>Random-effects model<br/><b>RR=0.94 (0.92; 0.96)</b><br/>fixed-effects models</p> <p>case-control:<br/><b>RR=0.92 (0.87; 0.98)</b> Random-effects model<br/><b>RR=0.93 (0.91; 96)</b><br/>fixed-effects models</p> <p>Cohort:<br/><b>RR=0.91 (0.83; 1.00)</b> Random-effects model<br/><b>RR=0.96 (0.93; 0.99)</b><br/>fixed-effects models</p> | <p>p&lt;0.01,<br/>case-control:<br/>I<sup>2</sup>=64% p&lt;0.01</p> <p>Publication bias:<br/>Overall:<br/>Egger=0.33,<br/>Begg=0.11</p> <p>RCT:<br/>Egger=0.22,<br/>Begg=0.31</p> <p>Obs:<br/>Egger=0.36,<br/>Begg=0.16</p> <p>case-control:<br/>Egger=0.56,<br/>Begg=0.22</p> <p>Cohort:<br/>Egger=0.54,<br/>Begg=0.27</p> |
| Taylor et al., 2008 USA [77] | Up to December 2006                  | <b>Inclusions:</b> 1) case-control, 2) assess the association between statins and cancer.                                                                                                     | Statin       | Any comparisons | Colon cancer*<br>6 case-control | <b>OR=0.89 (0.82;0.97)</b><br>Random-effects model                                                                                                                                                                                                                                                                                                                                                                                                                                                      | Quality not reported<br><br>Heterogeneity:                                                                                                                                                                                                                                                                                  |

| Study Country (Reference) | Search period and databases searched                                                                                            | Inclusions / exclusions                                                                                                                      | Intervention | Control | Outcomes                                      | Results* | Quality score Heterogeneity Publication bias                                         |
|---------------------------|---------------------------------------------------------------------------------------------------------------------------------|----------------------------------------------------------------------------------------------------------------------------------------------|--------------|---------|-----------------------------------------------|----------|--------------------------------------------------------------------------------------|
|                           | Medline, Cumulative Index to Nursing and Allied Health, Excerpta Medica, Web of Science, Scopus and BIOSIS-Biological Abstracts | <b>Exclusions:</b> 1) insufficient data for determining both the odds ratio (OR) and the 95% CI. Description of excluded studies in article. |              |         | N=100,129 cancer cases (unk for colon cancer) |          | Not reported for colon cancer<br><br>Publication bias: Not reported for colon cancer |

CI: confidence interval, CRC: colorectal cancer, FU: follow-up, HR: hazard ratio, OR ; odds ratio, RCT: randomized controlled trials, RR : relative risk, unk: unknown

Supplementary Table 4 . Components with increased CRC prevention

| Authors Country (Reference)                                                                | Search period and databases searched | Inclusion / exclusions                                                                                                                                                                                                                                                                                                                                                                                                        | Intervention                    | Control | Outcomes      | Results                   | Quality score Heterogeneity Publication bias                                                          |
|--------------------------------------------------------------------------------------------|--------------------------------------|-------------------------------------------------------------------------------------------------------------------------------------------------------------------------------------------------------------------------------------------------------------------------------------------------------------------------------------------------------------------------------------------------------------------------------|---------------------------------|---------|---------------|---------------------------|-------------------------------------------------------------------------------------------------------|
| <b>MEAT (TOTAL MEAT, RED MEAT, PROCESSED MEAT, POULTRY, ANIMAL FAT AND PROTEIN INTAKE)</b> |                                      |                                                                                                                                                                                                                                                                                                                                                                                                                               |                                 |         |               |                           |                                                                                                       |
| Sandhu et al., 2001 UK [83]                                                                | Up to June 1999                      | <b>Inclusions:</b> 1) published and unpublished prospective Cohort that contained risk estimates of CRC associated with meat consumption, 2) eligible outcomes were colon or colorectal cancer incidence or mortality.<br><br><b>Exclusions:</b> 1) case-control and ecological studies, 2) studies that only classified people as to whether they ate meat or not (level of exposure in the exposed group is not quantified) | Dose response all meat 100g/day |         | CRC incidence | <b>OR=1.21(1.10;1.33)</b> | Quality not reported<br><br><b>Heterogeneity:</b> p=0.06<br><br>publication bias: unable to determine |
|                                                                                            |                                      |                                                                                                                                                                                                                                                                                                                                                                                                                               | Dose response red meat          |         | CRC incidence | <b>OR=1.30(1.13;1.49)</b> | Quality not reported                                                                                  |



| Authors<br>Country<br>(Reference)                 | Search period<br>and databases<br>searched | Inclusion / exclusions                                                                                                                                                                                                                                                      | Intervention                          | Control                              | Outcomes                             | Results                                                                                                                                                                                       | Quality score<br>Heterogeneity<br>Publication bias                                                                 |                                 |
|---------------------------------------------------|--------------------------------------------|-----------------------------------------------------------------------------------------------------------------------------------------------------------------------------------------------------------------------------------------------------------------------------|---------------------------------------|--------------------------------------|--------------------------------------|-----------------------------------------------------------------------------------------------------------------------------------------------------------------------------------------------|--------------------------------------------------------------------------------------------------------------------|---------------------------------|
|                                                   |                                            | Definition of meat: A broad definition of “meat” was used, which was taken to include red meat, lamb, beef, pork, and processed meats, such as sausages, meat burgers, ham, bacon and other meat products, but which, where possible, excluded white meat, such as poultry. | 100g/day                              |                                      |                                      |                                                                                                                                                                                               | <b>Heterogeneity:</b><br>p=0.02<br><br>publication bias:<br><b>Begg p=0.03</b>                                     |                                 |
| Alexander et al., 2009<br>USA<br>[84]             | up to December 2007                        | <b>Inclusions:</b> 1) epidemiologic Cohort and case-control studies that reported results for the association between animal fat intake and CRC                                                                                                                             | Highest level animal fat intake       | Lowest level animal fat intake       | CRC Risk                             | SRRE=1.04(0.83;1.31),                                                                                                                                                                         | Quality not reported<br><br><b>Heterogeneity:</b><br>p=0.22<br><br>Publication bias<br>Begg p=0.35<br>Egger p=0.42 |                                 |
|                                                   |                                            |                                                                                                                                                                                                                                                                             |                                       |                                      | 6 Cohort                             | Dose response 20-g/d increment in animal fat intake and colorectal cancer<br>SRRE=1.02(0.95;1.09)<br><br><b>Subgroup:</b><br>Male:<br>SRRE=0.96(0.67;1.38)<br>Female:<br>SRRE=1.10(0.77;1.57) |                                                                                                                    |                                 |
|                                                   |                                            |                                                                                                                                                                                                                                                                             |                                       |                                      | Colon cancer<br>4 Cohort             | SRRE=1.11(0.81;1.52)                                                                                                                                                                          |                                                                                                                    | <b>Heterogeneity:</b><br>p=0.12 |
|                                                   |                                            |                                                                                                                                                                                                                                                                             |                                       |                                      | Rectal Cancer<br>2 Cohort            | SRRE=1.34(0.90; 1.98)                                                                                                                                                                         |                                                                                                                    | <b>Heterogeneity:</b><br>p=0.51 |
|                                                   |                                            |                                                                                                                                                                                                                                                                             | Highest level protein intake          | Lowest level protein intake          | CRC Risk<br>6 Cohort or case-control | SRRE=1.05(0.89; 1.22)                                                                                                                                                                         | <b>Heterogeneity:</b><br>p=0.55                                                                                    |                                 |
| Huxley et al., 2009*<br>Australia<br>Huxley, [34] | 1996 to January 2008                       | <b>Inclusions:</b> 1) published quantitative estimates and standard errors (or some other measure of variability) of the association between each risk factor and colorectal cancer                                                                                         | highest level consumption of red meat | lowest level consumption of red meat | CRC Risk                             | <b>RR=1.21 (1.13; 1.29)</b>                                                                                                                                                                   | No quality assessment<br><br><b>Heterogeneity:</b><br>p=0.72                                                       |                                 |
|                                                   |                                            |                                                                                                                                                                                                                                                                             |                                       |                                      | 13,407 cases                         |                                                                                                                                                                                               |                                                                                                                    |                                 |
|                                                   |                                            |                                                                                                                                                                                                                                                                             |                                       |                                      | Colon risk                           | <b>RR=1.14 (1.02; 1.28)</b>                                                                                                                                                                   |                                                                                                                    |                                 |
|                                                   |                                            |                                                                                                                                                                                                                                                                             | highest level                         | lowest level                         | Rectal risk                          | <b>RR=1.28 (1.02; 1.60)</b>                                                                                                                                                                   |                                                                                                                    |                                 |
|                                                   |                                            |                                                                                                                                                                                                                                                                             |                                       |                                      | CRC Risk                             | <b>RR=1.19 (1.12; 1.27)</b>                                                                                                                                                                   | No quality                                                                                                         |                                 |

| Authors<br>Country<br>(Reference)     | Search period<br>and databases<br>searched | Inclusion / exclusions                                                                                                                                                                                                                                                                                                                                                                                                                 | Intervention                          | Control                              | Outcomes                             | Results                                                                                                                                                                                                                                                              | Quality score<br>Heterogeneity<br>Publication bias                                                                   |                                           |
|---------------------------------------|--------------------------------------------|----------------------------------------------------------------------------------------------------------------------------------------------------------------------------------------------------------------------------------------------------------------------------------------------------------------------------------------------------------------------------------------------------------------------------------------|---------------------------------------|--------------------------------------|--------------------------------------|----------------------------------------------------------------------------------------------------------------------------------------------------------------------------------------------------------------------------------------------------------------------|----------------------------------------------------------------------------------------------------------------------|-------------------------------------------|
|                                       |                                            | <b>Exclusions:</b> 1) provided only an estimate of effect, with no means by which to calculate the standard error, or 2) if the estimates were not at least age adjusted                                                                                                                                                                                                                                                               | consumption of processed meat         | consumption of processed meat        | 26 Cohort<br>13,471 cases            |                                                                                                                                                                                                                                                                      | assessment                                                                                                           |                                           |
|                                       |                                            |                                                                                                                                                                                                                                                                                                                                                                                                                                        |                                       |                                      | Colon risk                           | <b>RR=1.21 (1.08; 1.35)</b>                                                                                                                                                                                                                                          | <b>Heterogeneity:</b><br>p=0.42                                                                                      |                                           |
|                                       |                                            |                                                                                                                                                                                                                                                                                                                                                                                                                                        |                                       |                                      | Rectal risk                          | RR=1.18 (0.99; 1.41)                                                                                                                                                                                                                                                 |                                                                                                                      |                                           |
|                                       |                                            |                                                                                                                                                                                                                                                                                                                                                                                                                                        | highest level consumption of poultry  | lowest level consumption of poultry  | CRC Risk<br>5,461 cases              | RR=0.96 (0.86; 1.08)                                                                                                                                                                                                                                                 | No quality assessment                                                                                                |                                           |
| Alexander et al., 2011<br>USA<br>[85] | Up to June 2009                            | <b>Exclusion:</b> 1) reported data for a broad classification of meat, such as 'total meat' categories, which included poultry or fish, were excluded, 2) information pertaining to processed meat intake constituents of red meat, such as fat or protein from animal sources, heterocyclic amine exposure, cooking practices, or adenomatous polyps were obtained but these analyses were beyond the scope of the present assessment | highest level consumption of red meat | lowest level consumption of red meat | CRC cases<br>25 Cohort               | SRRE= <b>1.12(1.04;1.21)</b><br><br>Adjusted for 3 factors<br>SRRE=1.08(0.99; 1.18)<br><br>Dose-response each incremental serving per week<br><b>SRRE=1.02(1.00;1.04)</b><br><br>Subgroup:<br>Women<br>SRRE=1.01(0.87;1.17),<br>Men<br>SRRE= <b>1.21(1.04;1.42).</b> | <b>No quality assessment</b><br><br><b>Heterogeneity:</b><br>p=0.01<br><br><b>Publication bias</b><br>Egger's p=0.97 |                                           |
|                                       |                                            |                                                                                                                                                                                                                                                                                                                                                                                                                                        |                                       |                                      |                                      | Colon cancer<br>15 Cohort                                                                                                                                                                                                                                            | <b>RR=1.11 (1.03; 1.19)</b>                                                                                          | <b>Heterogeneity:</b><br>p=0.79           |
|                                       |                                            |                                                                                                                                                                                                                                                                                                                                                                                                                                        |                                       |                                      |                                      | Rectal cancer<br>12 Cohort                                                                                                                                                                                                                                           | SRRE=1.19 (0.97; 1.46)                                                                                               | <b>Heterogeneity:</b><br><b>p&lt;0.01</b> |
| Pham et al., 2014<br>Japan<br>[86]    | Up to August 2013                          | Inclusion: Only studies on Japanese populations living in Japan were included                                                                                                                                                                                                                                                                                                                                                          | Total meat                            |                                      | CRC Risk<br>6 Cohort; 8 case-control | RR=1.06 (0.92; 1.22)                                                                                                                                                                                                                                                 | Study quality performed – no change for only high quality study<br><br>No heterogeneity<br><br>No publication bias   |                                           |
|                                       |                                            |                                                                                                                                                                                                                                                                                                                                                                                                                                        |                                       |                                      | Colon risk                           | RR=1.17 (0.99; 1.39)                                                                                                                                                                                                                                                 |                                                                                                                      |                                           |
|                                       |                                            |                                                                                                                                                                                                                                                                                                                                                                                                                                        |                                       |                                      | Rectal risk                          | RR=0.90 (0.71; 1.14)                                                                                                                                                                                                                                                 |                                                                                                                      |                                           |

| Authors<br>Country<br>(Reference)               | Search period<br>and databases<br>searched | Inclusion / exclusions                                                                                                                                                                                                                                        | Intervention                                                       | Control | Outcomes                                  | Results                     | Quality score<br>Heterogeneity<br>Publication bias                                                      |
|-------------------------------------------------|--------------------------------------------|---------------------------------------------------------------------------------------------------------------------------------------------------------------------------------------------------------------------------------------------------------------|--------------------------------------------------------------------|---------|-------------------------------------------|-----------------------------|---------------------------------------------------------------------------------------------------------|
|                                                 |                                            |                                                                                                                                                                                                                                                               | Red meat                                                           |         | CRC Risk                                  | <b>RR=1.16 (1.00; 1.34)</b> | Heterogeneity:<br>p=0.11, I <sup>2</sup> =28%<br><br><b>No publication bias</b>                         |
|                                                 |                                            |                                                                                                                                                                                                                                                               |                                                                    |         | Colon risk                                | <b>RR=1.21 (1.03; 1.43)</b> | Heterogeneity:<br>-<br><br><b>No publication bias</b>                                                   |
|                                                 |                                            |                                                                                                                                                                                                                                                               | Processed meat                                                     |         | CRC Risk                                  | <b>RR=1.17 (1.02; 1.35)</b> | <b>Heterogeneity:</b><br>p=0.09, I <sup>2</sup> =30%<br><br><b>No publication bias</b>                  |
|                                                 |                                            |                                                                                                                                                                                                                                                               |                                                                    |         | Colon cancer                              | <b>RR=1.23 (1.03; 1.47)</b> | <b>No heterogeneity</b><br><br><b>No publication bias</b>                                               |
|                                                 |                                            |                                                                                                                                                                                                                                                               | Total poultry                                                      |         | Rectal cancer                             | <b>RR=0.80 (0.67; 0.96)</b> | <b>No heterogeneity</b><br><br><b>No publication bias</b>                                               |
| <b>Vieira et al, 2017*</b><br><b>UK</b><br>[27] | <b>Up to May 2015</b>                      | <b>Inclusion:</b> 1) RCT, Cohort or case-control design, 2) report adjusted estimates of the RR and 95% CIs for the association of foods and CRC incidence; 3) for dose-response meta-analysis, studies should provide a quantitative measure of the intake.. | Red and processed meat<br>Dose response<br>Incremental of 100g/day |         | CRC risk<br><br>15 Cohort<br>10,738 cases | <b>RR=1.12 (1.04; 1.21)</b> | Quality not reported<br><br><b>Heterogeneity:</b><br>p=0.30; I <sup>2</sup> =18%<br><br>Egger : p= 0.46 |
|                                                 |                                            |                                                                                                                                                                                                                                                               |                                                                    |         | Colon cancer<br>10 Cohort<br>10,010 cases | <b>RR=1.19 (1.10; 1.30)</b> | <b>Heterogeneity:</b><br>p=0.49; I <sup>2</sup> =0%<br><br><b>Egger : p= 0.02</b>                       |

| Authors<br>Country<br>(Reference) | Search period<br>and databases<br>searched | Inclusion / exclusions | Intervention                                                       | Control | Outcomes                                  | Results                     | Quality score<br>Heterogeneity<br>Publication bias                                        |
|-----------------------------------|--------------------------------------------|------------------------|--------------------------------------------------------------------|---------|-------------------------------------------|-----------------------------|-------------------------------------------------------------------------------------------|
|                                   |                                            |                        |                                                                    |         | Rectal cancer<br>6 Cohort<br>3,455 cases  | RR=1.17 (0.99; 1.39)        | <b>Heterogeneity:</b><br>P<0.01; I <sup>2</sup> =91%<br><br>Egger : p= 0.12               |
|                                   |                                            |                        | Red meat<br>Dose<br>response<br>Incremental<br>of 100g/day         |         | CRC risk<br>8 Cohort<br>6,662 cases       | <b>RR=1.12 (1.00; 1.25)</b> | <b>Heterogeneity:</b><br>P=0.24;<br>I <sup>2</sup> =23.6%<br><br>Egger : p= 0.48          |
|                                   |                                            |                        |                                                                    |         | Colon cancer<br>11 Cohort<br>4,081 cases  | <b>RR=1.22 (1.06; 1.39)</b> | <b>Heterogeneity:</b><br>P=0.33;<br>I <sup>2</sup> =11.7%<br><br>Egger : p= 0.76          |
|                                   |                                            |                        |                                                                    |         | Rectal cancer<br>8 Cohort<br>1,772 cases  | RR=1.13 (0.96; 1.34)        | <b>Heterogeneity:</b><br>P=0.52; I <sup>2</sup> =0%<br><br>Egger : p= 0.45                |
|                                   |                                            |                        | Processed<br>meat<br>Dose<br>response<br>Incremental<br>of 50g/day |         | CRC risk<br>10 Cohort<br>10,738 cases     | <b>RR=1.18 (1.10; 1.28)</b> | <b>Heterogeneity:</b><br>P=0.34; I <sup>2</sup> =11%<br><br>Egger : p= 0.29               |
|                                   |                                            |                        |                                                                    |         | Colon cancer<br>12 Cohort<br>8,599 cases  | <b>RR=1.23 (1.11; 1.35)</b> | <b>Heterogeneity:</b><br>P=0.18;<br>I <sup>2</sup> =26.2%<br><br><b>Egger : p&lt;0.01</b> |
|                                   |                                            |                        |                                                                    |         | Rectal cancer<br>10 Cohort<br>3,029 cases | <b>RR=1.08 (1.00; 1.18)</b> | <b>Heterogeneity:</b><br>P=0.77; I <sup>2</sup> =0%<br><br>Egger : p= 0.61                |
|                                   |                                            |                        | Poultry<br>Dose<br>response<br>Incremental                         |         | CRC risk<br>7 Cohort<br>3,429 cases       | RR=0.81 (0.53; 1.25)        | <b>Heterogeneity:</b><br>P=0.05; I <sup>2</sup> =48%<br><br>Egger : p= 0.52               |

| Authors<br>Country<br>(Reference)         | Search period<br>and databases<br>searched | Inclusion / exclusions                                                                                                                                                                                                                                                                                                                                                                                                                         | Intervention                            | Control                                | Outcomes                                             | Results                                                                                                                                                   | Quality score<br>Heterogeneity<br>Publication bias                                                                                                                                                           |
|-------------------------------------------|--------------------------------------------|------------------------------------------------------------------------------------------------------------------------------------------------------------------------------------------------------------------------------------------------------------------------------------------------------------------------------------------------------------------------------------------------------------------------------------------------|-----------------------------------------|----------------------------------------|------------------------------------------------------|-----------------------------------------------------------------------------------------------------------------------------------------------------------|--------------------------------------------------------------------------------------------------------------------------------------------------------------------------------------------------------------|
|                                           |                                            |                                                                                                                                                                                                                                                                                                                                                                                                                                                | of 100g/day                             |                                        | Colon cancer<br>10 Cohort<br>8,429 cases             | RR=0.83 (0.63; 1.11)                                                                                                                                      | <b>Heterogeneity:</b><br>P=0.12;<br>I <sup>2</sup> =34.6%<br><br>Egger : p= 0.08                                                                                                                             |
|                                           |                                            |                                                                                                                                                                                                                                                                                                                                                                                                                                                |                                         |                                        | Rectal cancer<br>6 Cohort<br>3,201 cases             | RR=0.86 (0.72;1.01)                                                                                                                                       | <b>Heterogeneity:</b><br>P=0.96; I <sup>2</sup> =0%<br><br>Egger : p= 0.60                                                                                                                                   |
| Woo et al.,<br>2014<br>Korea<br>[40]      | Up to June 20 <sup>th</sup> ,<br>2014      | (1) original articles with a case-control or Codesign; (2) articles reporting on cancer risk and diet in the Korean population; (3) studies reporting adjusted OR or RR with 95% CI for the risk of cancer in subjects with the highest category of food intake compared with those with the lowest food intake; and (4) in cases of multiple publications drawn from studies of the same population, only the most recent study was included. | Highest level<br>of meat<br>consumption | Lowest level<br>of meat<br>consumption | CRC risk<br>3 studies                                | <b>RR=1.25 (1.15; 1.36)</b>                                                                                                                               | Quality<br>Not performed<br><br>Heterogeneity<br>P=0.256,<br>I <sup>2</sup> =26.7%<br><br>Publication bias<br>Not performed                                                                                  |
| <b>ALCOHOL</b>                            |                                            |                                                                                                                                                                                                                                                                                                                                                                                                                                                |                                         |                                        |                                                      |                                                                                                                                                           |                                                                                                                                                                                                              |
| Longnecker<br>et al., 1990<br>USA<br>[87] | From 1966 to<br>March 1989                 | <b>Inclusions:</b> 1) alcohol intake had to have been determined quantitatively by means of personal history; 2) otherwise alcohol consumption was likely to be misclassified, and 3) the association of alcohol consumption with risk of CRC might have been underestimated.<br><br><b>Exclusions:</b> 1 Unpublished data were not eligible for inclusion in the analysis.                                                                    | Daily<br>alcohol<br>intake<br>24g/day   |                                        | CRC<br>incidence<br>27 case-<br>control or<br>Cohort | <b>RR=1.10 (1.05; 1.14)</b><br><br><b>Subgroup:</b><br>Colorectal women:<br><b>RR=1.12 (1.01, 1.23)</b><br>Colorectal men:<br><b>RR=1.10 (1.04, 1.17)</b> | <b>Quality:</b><br>Assessed by<br>authors with own<br>scale. Low<br>quality studies<br>may have been<br>taken out of<br>analyses<br><br><b>Heterogeneity:</b><br>Present both<br>statistical and<br>clinical |

| Authors<br>Country<br>(Reference)       | Search period<br>and databases<br>searched | Inclusion / exclusions                                                                                                                                                                                                                                                                                                                                                                                              | Intervention                                                 | Control | Outcomes                                                                 | Results                                                                                                                                                                                                                                                                       | Quality score<br>Heterogeneity<br>Publication bias                                                                                                  |
|-----------------------------------------|--------------------------------------------|---------------------------------------------------------------------------------------------------------------------------------------------------------------------------------------------------------------------------------------------------------------------------------------------------------------------------------------------------------------------------------------------------------------------|--------------------------------------------------------------|---------|--------------------------------------------------------------------------|-------------------------------------------------------------------------------------------------------------------------------------------------------------------------------------------------------------------------------------------------------------------------------|-----------------------------------------------------------------------------------------------------------------------------------------------------|
|                                         |                                            |                                                                                                                                                                                                                                                                                                                                                                                                                     |                                                              |         |                                                                          |                                                                                                                                                                                                                                                                               | Publication bias<br>potential bias<br>present                                                                                                       |
|                                         |                                            |                                                                                                                                                                                                                                                                                                                                                                                                                     |                                                              |         | Colon cancer<br>incidence<br>14 case-<br>control or<br>Cohort            | <b>RR=1.10 (1.03; 1.17)</b>                                                                                                                                                                                                                                                   |                                                                                                                                                     |
|                                         |                                            |                                                                                                                                                                                                                                                                                                                                                                                                                     |                                                              |         | Rectal cancer<br>incidence<br>14 case-<br>control or<br>Cohort           | <b>RR=1.10 (1.02; 1.18)</b>                                                                                                                                                                                                                                                   |                                                                                                                                                     |
| Corrao et al.,<br>1999<br>Italy<br>[88] | From 1966 to<br>1998                       | <b>Inclusions:</b> 1) case-control or Cohort<br>published as an original article, 2)<br>findings expressed directly as OR or RR<br>considering three or more levels of<br>alcohol consumption; 3) reported number<br>of cases and non-cases and estimates of<br>the OR or RR for each exposure level.<br><br><b>Exclusions:</b> 1) ecological and prevalence<br>studies and/or abstracts, letters and<br>editorials | Daily<br>alcohol<br>intake<br>25g/day<br>50g/day<br>100g/day |         | Colon cancer<br>incidence<br><br>12CC and 4<br>Cohort<br><br>5360 Cases  | case-control:<br>25g/day:<br>RR=1.0 (1.0; 1.1)<br>50g/day<br><b>RR=1.10 (1.00; 1.20)</b><br>100g/day<br><b>RR=1.10 (1.00; 1.30)</b><br><br>Cohort:<br>25g/day:<br><b>RR=1.40 (1.10; 1.70)</b><br>50g/day<br><b>RR=1.90 (1.3; 2.9)</b><br>100g/day<br><b>RR=3.6 (1.6; 8.5)</b> | <b>Quality:</b><br>Mean author<br>score (range):<br>14 (9; 19)<br><br><b>Heterogeneity:</b><br>p<0.01<br><br><b>Publication bias</b><br>funnel plot |
|                                         |                                            |                                                                                                                                                                                                                                                                                                                                                                                                                     |                                                              |         | Rectal cancer<br>incidence<br><br>11CC and 3<br>Cohort<br><br>2759 Cases | <u>Men</u><br>25g/day:<br>RR=1.0 (1.0; 1.2)<br>50g/day<br><b>RR=1.2 (1.1; 1.5)</b><br>100g/day<br><b>RR=1.5 (1.2; 2.2)</b>                                                                                                                                                    | <b>Quality:</b><br>Mean author<br>score (range):<br>13 (9; 19)<br><br><b>Heterogeneity:</b><br>p<0.01                                               |

| Authors<br>Country<br>(Reference)      | Search period<br>and databases<br>searched | Inclusion / exclusions                                                                                                                                                                                                                                                                                                                                                                                                              | Intervention                                           | Control                        | Outcomes                                                  | Results                                                                                                                                                              | Quality score<br>Heterogeneity<br>Publication bias                                                                                                            |
|----------------------------------------|--------------------------------------------|-------------------------------------------------------------------------------------------------------------------------------------------------------------------------------------------------------------------------------------------------------------------------------------------------------------------------------------------------------------------------------------------------------------------------------------|--------------------------------------------------------|--------------------------------|-----------------------------------------------------------|----------------------------------------------------------------------------------------------------------------------------------------------------------------------|---------------------------------------------------------------------------------------------------------------------------------------------------------------|
|                                        |                                            |                                                                                                                                                                                                                                                                                                                                                                                                                                     |                                                        |                                |                                                           | <p><u>Women</u><br/>25g/day:<br/><b>RR=2.3 (1.3; 4.0)</b><br/>50g/day<br/><b>RR=5.0 (1.6; 16.4)</b><br/>100g/day<br/><b>RR=25.7 (2.5; 267.6)</b></p>                 | <p><b>Publication bias</b><br/>funnel plot</p>                                                                                                                |
| Bagnardi et al., 2001<br>Italy<br>[89] | From 1966 to 2000                          | <p><b>Inclusions:</b> 1) case-control or Cohort study published as an original article; 2) OR or RR, considering at least 3 levels of alcohol consumption; 3) papers reporting the number of cases and non-cases, and the estimates of the OR or RR for each exposure level</p>                                                                                                                                                     | Daily alcohol intake<br>25g/day<br>50g/day<br>100g/day |                                | *CRC incidence<br><br><b>6 Cohort and 16 case-control</b> | <p>case-control or Cohort:<br/>25g/day:<br/><b>RR=1.08 (1.06, 1.10)</b><br/>50g/day<br/><b>RR=1.18 (1.14, 1.22)</b><br/>100g/day<br/><b>RR=1.38 (1.29, 1.49)</b></p> | <p>Quality not reported</p> <p><b>Heterogeneity:</b><br/>p&lt;0.05</p> <p><b>Publication bias not reported</b></p>                                            |
| Moskal et al., 2007<br>France<br>[90]  | From 1990 to June 2005                     | <p><b>Inclusions:</b> 1) prospective Cohort evaluating the relationship between total alcohol consumption and CRC risk; 2) published in English 3) CRC incidence as endpoint; 4) providing RR estimates and its corresponding 95% CI, or information allowing us to compute unadjusted variance.</p> <p><b>Exclusions:</b> Studies in particular populations (i.e. cohorts of alcoholics or brewery workers) were not included.</p> | Highest level of alcohol intake                        | Lowest level of alcohol intake | Colorectal cancer incidence<br><br>7 Cohort               | <p>RR=1.34 (0.92; 1.96)</p> <p><b>Subgroup:</b><br/>Colorectal women:<br/>RR= 0.88 (0.61; 1.27)<br/>Colorectal men:<br/>RR= 1.73 (1.00; 2.98)</p>                    | <p>Quality not reported</p> <p><b>Heterogeneity:</b><br/>p&lt;0.01; I<sup>2</sup>=71%</p> <p><b>Publication bias</b><br/>Egger's p=0.35<br/>Begg's p=0.88</p> |
|                                        |                                            |                                                                                                                                                                                                                                                                                                                                                                                                                                     |                                                        |                                | Colon cancer incidence<br><br>17 Cohort                   | <p><b>RR=1.50 (1.25; 1.79)</b></p> <p><b>Subgroup:</b><br/>women:<br/>RR= 1.23 (0.97; 1.83)<br/>men:<br/><b>RR= 1.64 (1.39; 1.93)</b></p>                            | <p>Quality not reported</p> <p><b>Heterogeneity:</b><br/>P=0.03; I<sup>2</sup>=43%</p> <p><b>Publication bias</b><br/>Egger's p=0.70<br/>Begg's p=0.25</p>    |

| Authors<br>Country<br>(Reference)      | Search period<br>and databases<br>searched | Inclusion / exclusions                                                                                                                                                                                                                                                                                          | Intervention                                                 | Control                        | Outcomes                                                     | Results                                                                                                                                                                                                                                                          | Quality score<br>Heterogeneity<br>Publication bias                                                                                                                                                                   |
|----------------------------------------|--------------------------------------------|-----------------------------------------------------------------------------------------------------------------------------------------------------------------------------------------------------------------------------------------------------------------------------------------------------------------|--------------------------------------------------------------|--------------------------------|--------------------------------------------------------------|------------------------------------------------------------------------------------------------------------------------------------------------------------------------------------------------------------------------------------------------------------------|----------------------------------------------------------------------------------------------------------------------------------------------------------------------------------------------------------------------|
|                                        |                                            |                                                                                                                                                                                                                                                                                                                 |                                                              |                                | Rectal cancer<br>incidence<br><br>14 Cohort                  | <b>RR=1.63 (1.35; 1.97)</b><br><br><b>Subgroup:</b><br>women:<br>RR=1.39 (0.95; 2.02)<br>men:<br><b>RR=1.79 (1.38; 2.33)</b>                                                                                                                                     | Quality not<br>reported<br><br><b>Heterogeneity:</b><br>P=0.68; I <sup>2</sup> =0%<br><br><b>Publication bias</b><br>Egger's p=0.70<br>Begg's p=0.34                                                                 |
|                                        |                                            |                                                                                                                                                                                                                                                                                                                 | Daily<br>alcohol<br>intake<br>25g/day<br>50g/day<br>100g/day |                                | Colon cancer<br>incidence<br><br>Rectal cancer<br>incidence  | 25g/day:<br><b>RR=1.03 (1.02; 1.05)</b><br>50g/day<br><b>RR=1.07 (1.03; 1.11)</b><br>100g/day<br><b>RR=1.15 (1.07; 1.23)</b><br><br>25g/day:<br><b>RR=1.04 (1.02; 1.05)</b><br>50g/day<br><b>RR=1.07 (1.05; 1.10)</b><br>100g/day<br><b>RR=1.15 (1.10; 1.21)</b> |                                                                                                                                                                                                                      |
| Fedirko et<br>al., 2011<br>USA<br>[91] | Up to May<br>2010                          | Inclusions: 1) case-control or Cohort, 2) alcohol intake and CRC incidence or mortality in general population, 3) reporting the OR or RR estimates with the corresponding 95% CI or sufficient information to calculate them; 4) reporting an association for at least three categories of alcohol consumption. | Drinkers                                                     | Non-<br>occasional<br>drinkers | CRC<br>incidence<br><br>23 Cohort<br>and 34 case-<br>control | <b>RR=1.12 (1.06; 1.19)</b><br><br><b>Subgroup:</b><br>Colorectal women:<br>RR=1.00 (0.94; 1.07)<br>Colorectal men:<br><b>RR=1.25 (1.13; 1.39)</b>                                                                                                               | <b>Quality:</b><br>authors criteria<br><br><b>Heterogeneity:</b><br>potential<br>heterogeneity of<br>effects by sex,<br>colorectal site,<br><br><b>Publication bias</b><br>minor evidence<br>of publication<br>bias. |



| Authors<br>Country<br>(Reference) | Search period<br>and databases<br>searched | Inclusion / exclusions | Intervention                                                                            | Control                        | Outcomes                                                   | Results                                                                                                                                               | Quality score<br>Heterogeneity<br>Publication bias |
|-----------------------------------|--------------------------------------------|------------------------|-----------------------------------------------------------------------------------------|--------------------------------|------------------------------------------------------------|-------------------------------------------------------------------------------------------------------------------------------------------------------|----------------------------------------------------|
|                                   |                                            |                        |                                                                                         |                                | Colon cancer<br>incidence<br>42 Cohort or<br>case-control  | RR=1.05 (0.99; 1.12)                                                                                                                                  |                                                    |
|                                   |                                            |                        |                                                                                         |                                | Rectal cancer<br>incidence<br>38 Cohort or<br>case-control | <b>RR=1.19 (1.09; 1.31)</b>                                                                                                                           |                                                    |
|                                   |                                            |                        | Light<br>alcohol<br>intake<br>(≤1 drink/<br>day (≤12.5<br>g/day of<br>ethanol))         | Non-<br>occasional<br>drinkers | CRC<br>incidence<br>23 Cohort<br>and 26 case-<br>control   | RR=1.00 (0.95; 1.05)<br><b>Subgroup:</b><br>Colorectal women:<br>RR=0.95 (0.89; 1.01)<br>Colorectal men:<br>RR=1.02 (0.92; 1.14)                      |                                                    |
|                                   |                                            |                        |                                                                                         |                                | Colon cancer<br>incidence<br>36 Cohort or<br>case-control  | RR=0.96 (0.90; 1.02)                                                                                                                                  |                                                    |
|                                   |                                            |                        |                                                                                         |                                | Rectal cancer<br>incidence<br>32 Cohort or<br>case-control | RR=1.06 (0.98; 1.14)                                                                                                                                  |                                                    |
|                                   |                                            |                        | Moderate<br>alcohol<br>intake (2–3<br>drinks/day<br>(12.6–49.9<br>g/day of<br>ethanol)) | Non-<br>occasional<br>drinkers | CRC<br>incidence<br>22 Cohort<br>and 31 case-<br>control   | <b>RR=1.21 (1.13; 1.28)</b><br><b>Subgroup:</b><br>Colorectal women:<br><b>RR=1.08 (1.03; 1.13)</b><br>Colorectal men:<br><b>RR=1.24 (1.13; 1.37)</b> |                                                    |
|                                   |                                            |                        |                                                                                         |                                | Colon cancer<br>incidence<br>39 Cohort or<br>case-control  | <b>RR=1.15 (1.06; 1.24)</b>                                                                                                                           |                                                    |
|                                   |                                            |                        |                                                                                         |                                | Rectal cancer<br>incidence                                 | <b>RR=1.23 (1.13; 1.35)</b>                                                                                                                           |                                                    |

| Authors<br>Country<br>(Reference)      | Search period<br>and databases<br>searched | Inclusion / exclusions                                                                                                                                                                                                                                                                                                                                                                                                                                             | Intervention                                                | Control                 | Outcomes                                             | Results                                                                                                                                                                                                                                                                | Quality score<br>Heterogeneity<br>Publication bias                                                              |
|----------------------------------------|--------------------------------------------|--------------------------------------------------------------------------------------------------------------------------------------------------------------------------------------------------------------------------------------------------------------------------------------------------------------------------------------------------------------------------------------------------------------------------------------------------------------------|-------------------------------------------------------------|-------------------------|------------------------------------------------------|------------------------------------------------------------------------------------------------------------------------------------------------------------------------------------------------------------------------------------------------------------------------|-----------------------------------------------------------------------------------------------------------------|
|                                        |                                            |                                                                                                                                                                                                                                                                                                                                                                                                                                                                    |                                                             |                         | 35 Cohort or case-control                            |                                                                                                                                                                                                                                                                        |                                                                                                                 |
|                                        |                                            |                                                                                                                                                                                                                                                                                                                                                                                                                                                                    | Heavy alcohol intake (≥4 drinks/day (≥50 g/day of ethanol)) | Non-occasional drinkers | CRC incidence<br>7 Cohort and 12 case-control        | <b>RR=1.52 (1.27; 1.81)</b><br><b>Subgroup:</b><br>Colorectal women:<br><b>RR=1.54 (1.04; 2.29)</b><br>Colorectal men:<br><b>RR=1.62 (1.31; 2.01)</b>                                                                                                                  |                                                                                                                 |
|                                        |                                            |                                                                                                                                                                                                                                                                                                                                                                                                                                                                    |                                                             |                         | Colon cancer incidence<br>16 Cohort or case-control  | <b>RR=1.43 (1.23; 1.67)</b>                                                                                                                                                                                                                                            |                                                                                                                 |
|                                        |                                            |                                                                                                                                                                                                                                                                                                                                                                                                                                                                    |                                                             |                         | Rectal cancer incidence<br>15 Cohort or case-control | <b>RR=1.59 (1.18; 2.15)</b>                                                                                                                                                                                                                                            |                                                                                                                 |
| Bagnardi et al., 2013<br>Italy<br>[92] | Up to December 2010                        | Inclusion: 1) case-control or Cohort published as original articles, 2) OR, RR or HR (or reporting sufficient data to compute them) for 3) light drinkers (≤12.5 g ethanol; ≤1 drink) versus non-drinkers. 4) studies that reported standard errors or CIs of the risk estimates, or provided sufficient data to calculate them.<br><br>Exclusions: 1) abstracts, letters, reviews and meta-analyses, 2) Specific type of alcoholic beverage only (e.g. beer only) | Light drinkers (≤12.5 g ethanol; ≤1 drink)                  | Non-drinkers            | *CRC incidence<br><br>26 Cohort, 28 case-control     | <b>case-control or Cohort:</b><br>RR=0.99 (0.95; 1.04)<br><br><b>Cohort:</b><br>RR=1.00 (0.95, 1.05)<br><b>case-control:</b><br>RR=0.98 (0.91, 1.06)<br><br><b>Subgroup:</b><br>Colorectal women:<br>RR= 0.93 (0.87, 0.99)<br>Colorectal men:<br>RR= 1.05 (0.95, 1.16) | Quality not reported<br><br><b>Heterogeneity:</b><br>Moderate or low<br><br><b>Publication bias:</b><br>P=0.059 |
| Bagnardi et al., 2015<br>Italy<br>[93] | Up to September 2012                       | <b>Inclusion:</b> 1) case-control or Cohort published as original articles, 2) reported OR, RR or HR (or reporting sufficient data to compute them) for 3) light drinkers (≤12.5 g ethanol; ≤1 drink) versus non-drinkers. 4) studies that                                                                                                                                                                                                                         | Daily alcohol intake ≤12.5g/day ≤50g/day >50g/day           |                         | *CRC<br><br><b>33 Cohort and 33 case-control</b>     | case-control or Cohort:<br>≤12.5g/day<br>RR=0.99 (0.95; 1.06)<br>≤50g/day<br><b>RR=1.17 (1.11, 1.24)</b><br>>50g/day                                                                                                                                                   | Quality not reported<br><br><b>Heterogeneity:</b><br>≤12.5g/day;                                                |

| Authors<br>Country<br>(Reference)   | Search period<br>and databases<br>searched | Inclusion / exclusions                                                                                                                                                                                                                                                                                                | Intervention         | Control                     | Outcomes                                            | Results                                                                                                                                                                                                                                                                                                                                                                     | Quality score<br>Heterogeneity<br>Publication bias                                                                                   |                                                   |
|-------------------------------------|--------------------------------------------|-----------------------------------------------------------------------------------------------------------------------------------------------------------------------------------------------------------------------------------------------------------------------------------------------------------------------|----------------------|-----------------------------|-----------------------------------------------------|-----------------------------------------------------------------------------------------------------------------------------------------------------------------------------------------------------------------------------------------------------------------------------------------------------------------------------------------------------------------------------|--------------------------------------------------------------------------------------------------------------------------------------|---------------------------------------------------|
|                                     |                                            | <p>reported standard errors or CIs of the risk estimates, or provided sufficient data to calculate them.</p> <p><b>Exclusions:</b> 1) abstracts, letters, reviews and meta-analyses, 2) Specific type of alcoholic beverage only (e.g. beer only)</p>                                                                 |                      |                             |                                                     | <p><b>RR=1.44 (1.25, 1.65)</b></p> <p><b>Subgroup:</b><br/>Colorectal women:<br/>≤12.5g/day:<br/>RR= 0.95 (0.89; 1.01)<br/>≤50g/day:<br/>RR=1.07 (0.99; 1.16)<br/>&gt;50g/day:<br/>RR=1.24 (0.68; 2.25)</p> <p>Colorectal men:<br/>≤12.5g/day:<br/>RR= 1.05 (0.95; 1.16)<br/>≤50g/day:<br/><b>RR=1.21 (1.11; 1.32)</b><br/>&gt;50g/day:<br/><b>RR=1.53 (1.30; 1.80)</b></p> | <p>I<sup>2</sup>=40<br/>≤50g/day: I<sup>2</sup>=52<br/>&gt;50g/day: I<sup>2</sup>=69</p> <p><b>Publication bias not reported</b></p> |                                                   |
| Wang et al.,<br>2015<br>USA<br>[94] | Up to July 2014                            | <b>Inclusions:</b> 1) case-control or Cohort, 2) alcohol intake and CRC incidence or mortality in general population, 3) reporting the OR or RR estimates with the corresponding 95% CI or sufficient information to calculate them; 4) reporting an association for at least three categories of alcohol consumption | Drinkers             | Non- or occasional drinkers | CRC incidence<br>22 Cohort and 2 case-control       | <b>RR=1.13 (1.09; 1.17)</b>                                                                                                                                                                                                                                                                                                                                                 | <b>Quality:</b><br>authors criteria                                                                                                  |                                                   |
|                                     |                                            |                                                                                                                                                                                                                                                                                                                       |                      |                             | Colon cancer incidence<br>6 Cohort or case-control  | <b>RR=1.18 (1.08; 1.30)</b>                                                                                                                                                                                                                                                                                                                                                 |                                                                                                                                      | <b>Heterogeneity:</b><br>Colorectal heterogeneity |
|                                     |                                            |                                                                                                                                                                                                                                                                                                                       |                      |                             | Rectal cancer incidence<br>3 Cohort or case-control | <b>RR=1.42 (1.03; 1.98)</b>                                                                                                                                                                                                                                                                                                                                                 |                                                                                                                                      |                                                   |
|                                     |                                            |                                                                                                                                                                                                                                                                                                                       | Light alcohol intake | Non- or occasional drinkers | CRC incidence<br>21 Cohort                          | <b>RR=1.07 (1.02; 1.13)</b>                                                                                                                                                                                                                                                                                                                                                 |                                                                                                                                      |                                                   |

| Authors<br>Country<br>(Reference) | Search period<br>and databases<br>searched | Inclusion / exclusions | Intervention                                                                                | Control                           | Outcomes                                                  | Results                                                                                                                                               | Quality score<br>Heterogeneity<br>Publication bias |
|-----------------------------------|--------------------------------------------|------------------------|---------------------------------------------------------------------------------------------|-----------------------------------|-----------------------------------------------------------|-------------------------------------------------------------------------------------------------------------------------------------------------------|----------------------------------------------------|
|                                   |                                            |                        | ( $\leq 1$ drink/<br>day ( $\leq 12.5$<br>g/day of<br>ethanol))                             |                                   | and 2 case-<br>control                                    | Colorectal women:<br>RR=0.98 (0.91; 1.08)<br>Colorectal men:<br>RR=0.97 (0.88; 1.10)                                                                  |                                                    |
|                                   |                                            |                        |                                                                                             |                                   | Colon cancer<br>incidence<br>21 Cohort or<br>case-control | RR=1.02 (0.91; 1.14)                                                                                                                                  |                                                    |
|                                   |                                            |                        |                                                                                             |                                   | Rectal cancer<br>incidence<br>2 Cohort or<br>case-control | RR=1.28 (0.83; 1.98)                                                                                                                                  |                                                    |
|                                   |                                            |                        | Moderate<br>alcohol<br>intake (2–3<br>drinks/day<br>(12.6–49.9<br>g/day<br>of ethanol))     | Non- or<br>occasional<br>drinkers | CRC<br>incidence<br>18 Cohort<br>and 2 case-<br>control   | <b>RR=1.23 (1.15; 1.33)</b><br><b>Subgroup:</b><br>Colorectal women:<br><b>RR=1.14 (1.04; 1.25)</b><br>Colorectal men:<br><b>RR=1.28 (1.15; 1.44)</b> |                                                    |
|                                   |                                            |                        |                                                                                             |                                   | Colon cancer<br>incidence<br>8 Cohort or<br>case-control  | <b>RR=1.35 (1.21; 1.50)</b>                                                                                                                           |                                                    |
|                                   |                                            |                        |                                                                                             |                                   | Rectal cancer<br>incidence<br>3 Cohort or<br>case-control | RR=1.41 (0.95; 2.08)                                                                                                                                  |                                                    |
|                                   |                                            |                        | Heavy<br>alcohol<br>intake<br>( $\geq 4$<br>drinks/day<br>( $\geq 50$ g/day<br>of ethanol)) | Non- or<br>occasional<br>drinkers | CRC<br>incidence<br>7 Cohort and<br>12 case-<br>control   | <b>RR=1.37 (1.28; 1.49)</b><br><b>Subgroup:</b><br>Colorectal women:<br>RR=0.85 (0.84; 1.42)<br>Colorectal men:<br><b>RR=1.38 (1.22; 1.57)</b>        |                                                    |
|                                   |                                            |                        |                                                                                             |                                   | Colon cancer<br>incidence<br>4 Cohort or                  | <b>RR=1.23 (1.03; 1.47)</b>                                                                                                                           |                                                    |

| Authors<br>Country<br>(Reference)      | Search period<br>and databases<br>searched | Inclusion / exclusions                                                                                                                                                                                      | Intervention                                                 | Control                         | Outcomes                                                                  | Results                                                                                                                                 | Quality score<br>Heterogeneity<br>Publication bias                                                                                                        |
|----------------------------------------|--------------------------------------------|-------------------------------------------------------------------------------------------------------------------------------------------------------------------------------------------------------------|--------------------------------------------------------------|---------------------------------|---------------------------------------------------------------------------|-----------------------------------------------------------------------------------------------------------------------------------------|-----------------------------------------------------------------------------------------------------------------------------------------------------------|
|                                        |                                            |                                                                                                                                                                                                             |                                                              |                                 | case-control<br>Rectal cancer<br>incidence<br>2 Cohort or<br>case-control | <b>RR=1.77 (1.09; 2.88)</b>                                                                                                             |                                                                                                                                                           |
| Zhang et al.,<br>2015<br>China<br>[95] |                                            | Inclusions: (1) case-control or Cohort as published as original article; 2) reported RR estimates and corresponding 95 % CI for consumption of beer and CRC incidence at least; adjusted or matched for age | Beer drinker                                                 | non-<br>/occasional<br>drinkers | CRC<br>incidence<br>9 Cohort and<br>12 case-<br>control                   | <b>RR=1.20 (1.06; 1.37)</b><br><b>Subgroup:</b><br>Colorectal women:<br>RR=0.96 (0.69; 1.33)<br>Colorectal men:<br>RR=1.15 (0.66; 2.03) | <b>Quality:</b><br>authors criteria<br><b>Heterogeneity:</b><br>p<0.01; I <sup>2</sup> =73%<br><b>Publication bias</b><br>Begg's p=0.72<br>Egger's p=0.75 |
|                                        |                                            |                                                                                                                                                                                                             | Light beer<br>intake (<1<br>drink or<br>13g/day)             | non-<br>/occasional<br>drinkers | CRC<br>incidence                                                          | RR=1.03 (0.95; 1.11)                                                                                                                    | <b>Quality:</b><br>authors criteria<br><b>Heterogeneity:</b><br>none<br><b>Publication bias</b><br>Not reported                                           |
|                                        |                                            |                                                                                                                                                                                                             | Moderate<br>beer intake<br>(1-2 drinks<br>or 13-<br>26g/day) | non-<br>/occasional<br>drinkers | CRC<br>incidence                                                          | RR= 1.09 (0.91; 1.31)                                                                                                                   |                                                                                                                                                           |
|                                        |                                            |                                                                                                                                                                                                             | Heavy beer<br>intake (>2<br>drinks or ><br>26g /day)         | non-<br>/occasional<br>drinkers | CRC<br>incidence                                                          | <b>RR=1.37 (1.26; 1.49)</b>                                                                                                             |                                                                                                                                                           |

CI: confidence interval, CRC: colorectal cancer, HR: hazard ratio, OR ; odds ratio, RCT: randomized controlled trials, RR : relative risk, SRRE : summary relative risk estimate
